# Supplementary material for: How Effective Are Push–Pull Semiochemicals as Deterrents for Bark Beetles? A Global Meta-Analysis of Thirty Years of Research
Source: MDPI journal article supplement (doi:10.3390/insects14100812), 2023-10-13
Supplement: s1 [file s1]

**Table S3.** Total number of manuscripts describing the effect of push-pull semiochemical treatment on attack and attraction of *Dendroctonus* and *Ips* species

| Number of manuscripts*        |                     |            |
|-------------------------------|---------------------|------------|
| Variable                      | <i>Dendroctonus</i> | <i>Ips</i> |
| Tree killed                   | 4                   | 0          |
| Tree attack                   | 10                  | 2          |
| Attraction to lure-male       | 11                  | 3          |
| Attraction to lure-female     | 12                  | 3          |
| Attraction to lure-both sexes | 25                  | 17         |

\*Total number of manuscripts is 52, but some manuscripts describe more than one type of measure.
