# Supplementary material for: How Effective Are Push–Pull Semiochemicals as Deterrents for Bark Beetles? A Global Meta-Analysis of Thirty Years of Research
Source: Insects. 2023 Oct 13;14(10):812. doi: 10.3390/insects14100812 (PMC10607257; doi:10.3390/insects14100812)
Supplement: Supplementary file 1 [file insects-14-00812-s001.zip › S2_Supplementry_material .xlsx]

## Sheet: Sheet4
study_id	paper_num	authors	Publication_year	Publication country	Title	Country of experiment	Experiment regions	Species	Experimnet Year	Pull/Attractant	PUSH/Repellent	Test Compound/Repellent_ source/relation	Treatment_Effect	Response_variable	m_treatment	SD_treatment	N_treatment	m_control	SD_control	N_control
1	1	Hunt and Borden	1988	Canada	Response of mountain pine beetle, Dendroctonus ponderosae Hopkins, and pine engraver, Ips pini (say), to ipsdienol in southwestern British Columbia.	British Columbia	North-western North America	Dendroctonus ponderosae	1984	β-Myrcene + (+)-exo-Brevicomin + trans-Verbenol	Ipsdienol	Hetro	Tree attack	Tree attack	17	37.95	10	24	56.92	10
2	1	Hunt and Borden	1988	Canada	Response of mountain pine beetle, Dendroctonus ponderosae Hopkins, and pine engraver, Ips pini (say), to ipsdienol in southwestern British Columbia.	British Columbia	North-western North America	Dendroctonus ponderosae	1985	β-Myrcene + (+)-exo-Brevicomin + trans-Verbenol	Ipsdienol	Hetro	Tree attack	Tree attack	40	29.85	11	55	33.17	11
3	1	Hunt and Borden	1988	Canada	Response of mountain pine beetle, Dendroctonus ponderosae Hopkins, and pine engraver, Ips pini (say), to ipsdienol in southwestern British Columbia.	British Columbia	North-western North America	Dendroctonus ponderosae	1985	β-Myrcene + (+)-exo-Brevicomin + trans-Verbenol	Ipsdienol	Hetro	Tree attack	Tree attack	44	26.53	11	55	33.17	11
4	1	Hunt and Borden	1988	Canada	Response of mountain pine beetle, Dendroctonus ponderosae Hopkins, and pine engraver, Ips pini (say), to ipsdienol in southwestern British Columbia.	British Columbia	North-western North America	Dendroctonus ponderosae	1985	β-Myrcene + (+)-exo-Brevicomin + trans-Verbenol	Ipsdienol	Hetro	Tree attack	Tree attack	43	43.12	11	55	33.17	11
5	1	Hunt and Borden	1988	Canada	Response of mountain pine beetle, Dendroctonus ponderosae Hopkins, and pine engraver, Ips pini (say), to ipsdienol in southwestern British Columbia.	British Columbia	North-western North America	Dendroctonus ponderosae	1984	β-Myrcene + (+)-exo-Brevicomin + trans-Verbenol	Ipsdienol	Hetro	Attraction to lure	Attraction to lure	1.83333	3.4	8	6.20139	6.13	8
6	1	Hunt and Borden	1988	Canada	Response of mountain pine beetle, Dendroctonus ponderosae Hopkins, and pine engraver, Ips pini (say), to ipsdienol in southwestern British Columbia.	British Columbia	North-western North America	Dendroctonus ponderosae	1984	β-Myrcene + (+)-exo-Brevicomin + trans-Verbenol	Ipsdienol	Hetro	Attraction to lure	Attraction to lure	0.652778	1.65	8	6.20139	6.13	8
7	1	Hunt and Borden	1988	Canada	Response of mountain pine beetle, Dendroctonus ponderosae Hopkins, and pine engraver, Ips pini (say), to ipsdienol in southwestern British Columbia.	British Columbia	North-western North America	Dendroctonus ponderosae	1985	β-Myrcene + (+)-exo-Brevicomin + trans-Verbenol	Ipsdienol	Hetro	Attraction to lure	Attraction to lure	319.856	217.6	12	685.199	625.29	12
8	1	Hunt and Borden	1988	Canada	Response of mountain pine beetle, Dendroctonus ponderosae Hopkins, and pine engraver, Ips pini (say), to ipsdienol in southwestern British Columbia.	British Columbia	North-western North America	Dendroctonus ponderosae	1985	β-Myrcene + (+)-exo-Brevicomin + trans-Verbenol	Ipsdienol	Hetro	Attraction to lure	Attraction to lure	412.274	145.07	12	685.199	625.29	12
9	1	Hunt and Borden	1988	Canada	Response of mountain pine beetle, Dendroctonus ponderosae Hopkins, and pine engraver, Ips pini (say), to ipsdienol in southwestern British Columbia.	British Columbia	North-western North America	Dendroctonus ponderosae	1985	β-Myrcene + (+)-exo-Brevicomin + trans-Verbenol	Ipsdienol	Hetro	Attraction to lure	Attraction to lure	233.213	147.57	12	685.199	625.29	12
10	1	Hunt and Borden	1988	Canada	Response of mountain pine beetle, Dendroctonus ponderosae Hopkins, and pine engraver, Ips pini (say), to ipsdienol in southwestern British Columbia.	British Columbia	North-western North America	Dendroctonus ponderosae	1985	β-Myrcene + (+)-exo-Brevicomin + trans-Verbenol	Ipsdienol	Hetro	Attraction to lure	Attraction to lure	27.1363	17.2	12	108.083	156.4	12
11	1	Hunt and Borden	1988	Canada	Response of mountain pine beetle, Dendroctonus ponderosae Hopkins, and pine engraver, Ips pini (say), to ipsdienol in southwestern British Columbia.	British Columbia	North-western North America	Dendroctonus ponderosae	1985	β-Myrcene + (+)-exo-Brevicomin + trans-Verbenol	Ipsdienol	Hetro	Attraction to lure	Attraction to lure	63.2794	108.4	12	108.083	156.4	12
12	1	Hunt and Borden	1988	Canada	Response of mountain pine beetle, Dendroctonus ponderosae Hopkins, and pine engraver, Ips pini (say), to ipsdienol in southwestern British Columbia.	British Columbia	North-western North America	Dendroctonus ponderosae	1985	β-Myrcene + (+)-exo-Brevicomin + trans-Verbenol	Ipsdienol	Hetro	Attraction to lure	Attraction to lure	22.4018	21.6	12	108.083	156.4	12
13	1	Hunt and Borden	1988	Canada	Response of mountain pine beetle, Dendroctonus ponderosae Hopkins, and pine engraver, Ips pini (say), to ipsdienol in southwestern British Columbia.	British Columbia	North-western North America	Dendroctonus ponderosae	1985	β-Myrcene + (+)-exo-Brevicomin + trans-Verbenol	Ipsdienol	Hetro	Attraction to lure	Attraction to lure	137.037	97.67	12	131.541	63.32	12
14	1	Hunt and Borden	1988	Canada	Response of mountain pine beetle, Dendroctonus ponderosae Hopkins, and pine engraver, Ips pini (say), to ipsdienol in southwestern British Columbia.	British Columbia	North-western North America	Dendroctonus ponderosae	1985	β-Myrcene + (+)-exo-Brevicomin + trans-Verbenol	Ipsdienol	Hetro	Attraction to lure	Attraction to lure	113.023	110.09	12	131.541	63.32	12
15	1	Hunt and Borden	1988	Canada	Response of mountain pine beetle, Dendroctonus ponderosae Hopkins, and pine engraver, Ips pini (say), to ipsdienol in southwestern British Columbia.	British Columbia	North-western North America	Dendroctonus ponderosae	1985	β-Myrcene + (+)-exo-Brevicomin + trans-Verbenol	Ipsdienol	Hetro	Attraction to lure	Attraction to lure	73.2378	43.04	12	131.541	63.32	12
16	1	Hunt and Borden	1988	Canada	Response of mountain pine beetle, Dendroctonus ponderosae Hopkins, and pine engraver, Ips pini (say), to ipsdienol in southwestern British Columbia.	British Columbia	North-western North America	Ips pini	1984	(±)-Ipsdienol (high)	β-Myrcene + (+)-exo-Brevicomin + trans-Verbenol	Hetro+Host	Attraction to lure	Attraction to lure	2.37126	2.54	8	29.4611	20.53	8
17	1	Hunt and Borden	1988	Canada	Response of mountain pine beetle, Dendroctonus ponderosae Hopkins, and pine engraver, Ips pini (say), to ipsdienol in southwestern British Columbia.	British Columbia	North-western North America	Ips pini	1984	(±)-Ipsdienol (low)	β-Myrcene + (+)-exo-Brevicomin + trans-Verbenol	Hetro+Host	Attraction to lure	Attraction to lure	0.538922	1.32	8	7.47305	4.27	8
18	1	Hunt and Borden	1988	Canada	Response of mountain pine beetle, Dendroctonus ponderosae Hopkins, and pine engraver, Ips pini (say), to ipsdienol in southwestern British Columbia.	British Columbia	North-western North America	Ips pini	1985	(±)-Ipsdienol	β-Myrcene + (+)-exo-Brevicomin + trans-Verbenol	Hetro+Host	Attraction to lure	Attraction to lure	12.6485	31.21	12	17.599	14.23	12
19	1	Hunt and Borden	1988	Canada	Response of mountain pine beetle, Dendroctonus ponderosae Hopkins, and pine engraver, Ips pini (say), to ipsdienol in southwestern British Columbia.	British Columbia	North-western North America	Ips pini	1985	(+)-Ipsdienol	β-Myrcene + (+)-exo-Brevicomin + trans-Verbenol	Hetro+Host	Attraction to lure	Attraction to lure	1.90594	3	12	1.95545	2.74	12
20	1	Hunt and Borden	1988	Canada	Response of mountain pine beetle, Dendroctonus ponderosae Hopkins, and pine engraver, Ips pini (say), to ipsdienol in southwestern British Columbia.	British Columbia	North-western North America	Ips pini	1985	(-)-Ipsdienol	β-Myrcene + (+)-exo-Brevicomin + trans-Verbenol	Hetro+Host	Attraction to lure	Attraction to lure	1.5099	2.32	12	2.64851	3.6	12
21	1	Hunt and Borden	1988	Canada	Response of mountain pine beetle, Dendroctonus ponderosae Hopkins, and pine engraver, Ips pini (say), to ipsdienol in southwestern British Columbia.	British Columbia	North-western North America	Ips pini	1985	(±)-Ipsdienol	β-Myrcene + (+)-exo-Brevicomin + trans-Verbenol	Hetro+Host	Attraction to lure	Attraction to lure	0.743802	0.98	12	9.74026	13.95	12
22	1	Hunt and Borden	1988	Canada	Response of mountain pine beetle, Dendroctonus ponderosae Hopkins, and pine engraver, Ips pini (say), to ipsdienol in southwestern British Columbia.	British Columbia	North-western North America	Ips pini	1985	(+)-Ipsdienol	β-Myrcene + (+)-exo-Brevicomin + trans-Verbenol	Hetro+Host	Attraction to lure	Attraction to lure	1.21606	2.04	12	2.52656	1.72	12
23	1	Hunt and Borden	1988	Canada	Response of mountain pine beetle, Dendroctonus ponderosae Hopkins, and pine engraver, Ips pini (say), to ipsdienol in southwestern British Columbia.	British Columbia	North-western North America	Ips pini	1985	(-)-Ipsdienol	β-Myrcene + (+)-exo-Brevicomin + trans-Verbenol	Hetro+Host	Attraction to lure	Attraction to lure	1.74734	2.37	12	2.84534	4.13	12
24	1	Hunt and Borden	1988	Canada	Response of mountain pine beetle, Dendroctonus ponderosae Hopkins, and pine engraver, Ips pini (say), to ipsdienol in southwestern British Columbia.	British Columbia	North-western North America	Ips pini	1985	(±)-Ipsdienol	β-Myrcene + (+)-exo-Brevicomin + trans-Verbenol	Hetro+Host	Attraction to lure	Attraction to lure	5.83021	5.71	12	10.6367	7.48	12
25	1	Hunt and Borden	1988	Canada	Response of mountain pine beetle, Dendroctonus ponderosae Hopkins, and pine engraver, Ips pini (say), to ipsdienol in southwestern British Columbia.	British Columbia	North-western North America	Ips pini	1985	(+)-Ipsdienol	β-Myrcene + (+)-exo-Brevicomin + trans-Verbenol	Hetro+Host	Attraction to lure	Attraction to lure	4.33208	4.76	12	4.40699	5.15	12
26	1	Hunt and Borden	1988	Canada	Response of mountain pine beetle, Dendroctonus ponderosae Hopkins, and pine engraver, Ips pini (say), to ipsdienol in southwestern British Columbia.	British Columbia	North-western North America	Ips pini	1985	(-)-Ipsdienol	β-Myrcene + (+)-exo-Brevicomin + trans-Verbenol	Hetro+Host	Attraction to lure	Attraction to lure	5.23096	4.8	12	5.00624	4.11	12
27	2	Miller et al	1990	Canada	E-Myrcenol: A new pheromone for the pine engraver, Ips pini (say) (Coleoptera: Scolytidae).	British Columbia	North-western North America	Ips pini	1987	ipsdienol	E-myrcenol	Homo	Attraction to lure	Attraction to lure	151.011	93.09	10	221.573	112.28	10
28	2	Miller et al	1990	Canada	E-Myrcenol: A new pheromone for the pine engraver, Ips pini (say) (Coleoptera: Scolytidae).	British Columbia	North-western North America	Ips pini	1987	ipsdienol	E-myrcenol	Homo	Attraction to lure	Attraction to lure	160.449	126.49	10	221.573	112.28	10
29	2	Miller et al	1990	Canada	E-Myrcenol: A new pheromone for the pine engraver, Ips pini (say) (Coleoptera: Scolytidae).	British Columbia	North-western North America	Ips pini	1987	ipsdienol	E-myrcenol	Homo	Attraction to lure	Attraction to lure	56.4045	34.82	10	221.573	112.28	10
30	2	Miller et al	1990	Canada	E-Myrcenol: A new pheromone for the pine engraver, Ips pini (say) (Coleoptera: Scolytidae).	British Columbia	North-western North America	Ips pini	1987	ipsdienol	E-myrcenol	Homo	Attraction to lure	Attraction to lure	103.778	56.22	10	155.556	149.68	10
31	2	Miller et al	1990	Canada	E-Myrcenol: A new pheromone for the pine engraver, Ips pini (say) (Coleoptera: Scolytidae).	British Columbia	North-western North America	Ips pini	1987	ipsdienol	E-myrcenol	Homo	Attraction to lure	Attraction to lure	50.2222	47.08	10	155.556	149.68	10
32	2	Miller et al	1990	Canada	E-Myrcenol: A new pheromone for the pine engraver, Ips pini (say) (Coleoptera: Scolytidae).	British Columbia	North-western North America	Ips pini	1987	ipsdienol	E-myrcenol	Homo	Attraction to lure	Attraction to lure	22	21.78	10	155.556	149.68	10
33	3	Byers	1993	Sweden	Avoidance of competition by spruce bark beetles, Ips typographus and Pityogenes chalcographus .	Denmark	Scandinavia	Ips typographus	1986	2-methyl-3-buten-2-ol (MB) and (4S)-cis-verbenol (cV)	chalcogran + methyl (E, Z)-2,4- decadienoate	Hetro	Attraction to lure	Attraction to lure	21.13	24.3	18	38.0805	41.05	18
34	3	Byers	1993	Sweden	Avoidance of competition by spruce bark beetles, Ips typographus and Pityogenes chalcographus .	Denmark	Scandinavia	Ips typographus	1986	2-methyl-3-buten-2-ol (MB) and (4S)-cis-verbenol (cV)	methyl (E, Z)-2,4- decadienoate	Hetro	Attraction to lure	Attraction to lure	27.6316	13.93	16	41.8731	23.84	16
35	3	Byers	1993	Sweden	Avoidance of competition by spruce bark beetles, Ips typographus and Pityogenes chalcographus .	Denmark	Scandinavia	Ips typographus	1986	2-methyl-3-buten-2-ol (MB) and (4S)-cis-verbenol (cV)	(CH) chalcogran	Hetro	Attraction to lure	Attraction to lure	14.0093	5.57	16	42.1053	14.55	16
36	4	Kostyk et al	1993	Canada	Photoisomerization of antiaggregation pheromone verbenone: Biological and practical implications with respect to the mountain pine beetle, Dendroctonus ponderosae Hopkins (Coleoptera: Scolytidae).	British Columbia	North-western North America	Dendroctonus ponderosae	1991	myrcene, exo-brevicomin, and trans-verbenol	verbenone	Vb	Attraction to lure	Attraction to lure	1.12994	3.83	10	79.2575	40.58	10
37	4	Kostyk et al	1993	Canada	Photoisomerization of antiaggregation pheromone verbenone: Biological and practical implications with respect to the mountain pine beetle, Dendroctonus ponderosae Hopkins (Coleoptera: Scolytidae).	British Columbia	North-western North America	Dendroctonus ponderosae	1991	myrcene, exo-brevicomin, and trans-verbenol	verbenone	Vb	Attraction to lure	Attraction to lure	39.4673	29.1	10	79.2575	40.58	10
38	5	Hayes et al	1994	USA	Repellent properties of the host compound 4-allylanisole to the southern pine beetle.	Louisiana	South-eastern North America	Dendroctonus frontalis	1992	Frontalure	Verbenone	Vb	Attraction to lure	Attraction to lure	21.19	15.74	7	45.88	29.16	7
39	5	Hayes et al	1994	USA	Repellent properties of the host compound 4-allylanisole to the southern pine beetle.	Louisiana	South-eastern North America	Dendroctonus frontalis	1992	Frontalure	4-allylanisole + Verbenone	-	Attraction to lure	Attraction to lure	19.19	11.56	7	45.88	29.16	7
40	5	Hayes et al	1994	USA	Repellent properties of the host compound 4-allylanisole to the southern pine beetle.	Louisiana	South-eastern North America	Dendroctonus frontalis	1992	Frontalure	4-allylanisole	Host Repellent	Attraction to lure	Attraction to lure	16.75	10.64	7	45.88	29.16	7
41	5	Hayes et al	1994	USA	Repellent properties of the host compound 4-allylanisole to the southern pine beetle.	Louisiana	South-eastern North America	Dendroctonus frontalis	1992	Frontalure	4-allylanisole	Host Repellent	Attraction to lure	Attraction to lure	29.4	1.95	5	79.8	17.84	5
42	5	Hayes et al	1994	USA	Repellent properties of the host compound 4-allylanisole to the southern pine beetle.	Louisiana	South-eastern North America	Dendroctonus frontalis	1992	Frontalure	4-allylanisole	Host Repellent	Attraction to lure	Attraction to lure	21.6	1.68	5	79.8	17.84	5
43	5	Hayes et al	1994	USA	Repellent properties of the host compound 4-allylanisole to the southern pine beetle.	Louisiana	South-eastern North America	Dendroctonus frontalis	1992	Frontalure	4-allylanisole	Host Repellent	Attraction to lure	Attraction to lure	20.8	6.17	5	79.8	17.84	5
44	5	Hayes et al	1994	USA	Repellent properties of the host compound 4-allylanisole to the southern pine beetle.	Louisiana	South-eastern North America	Dendroctonus frontalis	1992	Frontalure	75 % turpentine :25% 4-allylanisole	Host Repellent	Attraction to lure	Attraction to lure	29.5	41.64	24	87.6	102.88	24
45	5	Hayes et al	1994	USA	Repellent properties of the host compound 4-allylanisole to the southern pine beetle.	Louisiana	South-eastern North America	Dendroctonus frontalis	1992	Frontalure	50 % turpentine:50 % 4-allylanisole	Host Repellent	Attraction to lure	Attraction to lure	22.2	24	24	87.6	102.88	24
46	5	Hayes et al	1994	USA	Repellent properties of the host compound 4-allylanisole to the southern pine beetle.	Louisiana	South-eastern North America	Dendroctonus frontalis	1992	Frontalure	25 % turpentine:75 % 4-allylanisole	Host Repellent	Attraction to lure	Attraction to lure	39.4	57.81	24	87.6	102.88	24
47	5	Hayes et al	1994	USA	Repellent properties of the host compound 4-allylanisole to the southern pine beetle.	Louisiana	South-eastern North America	Dendroctonus frontalis	1992	Frontalure	4-allylanisol	Host Repellent	Attraction to lure	Attraction to lure	15	29.39	24	87.6	102.88	24
48	5	Hayes et al	1994	USA	Repellent properties of the host compound 4-allylanisole to the southern pine beetle.	Louisiana	South-eastern North America	Dendroctonus frontalis	1992	Frontalure	Verbenone	Vb	Attraction to lure	Attraction to lure	112.221	45.29	6	150.053	61.95	6
49	5	Hayes et al	1994	USA	Repellent properties of the host compound 4-allylanisole to the southern pine beetle.	Louisiana	South-eastern North America	Dendroctonus frontalis	1992	Frontalure	4-allylanisole	Host Repellent	Attraction to lure	Attraction to lure	94.3677	49.98	6	150.053	61.95	6
50	5	Hayes et al	1994	USA	Repellent properties of the host compound 4-allylanisole to the southern pine beetle.	Louisiana	South-eastern North America	Dendroctonus frontalis	1992	Frontalure	Verbenone	Vb	Attraction to lure	Attraction to lure	100.847	40.36	7	245.339	110.99	7
51	5	Hayes et al	1994	USA	Repellent properties of the host compound 4-allylanisole to the southern pine beetle.	Louisiana	South-eastern North America	Dendroctonus frontalis	1992	Frontalure	4-allylanisole	Host Repellent	Attraction to lure	Attraction to lure	108.898	47.09	7	245.339	110.99	7
52	6	Miller et al	1995	Canada	Verbenone: dose-dependent interruption of pheromone-based attraction of three sympatric species of pine bark beetles (coleoptera: scolytidae).	British Columbia	North-western North America	Dendroctonus ponderosae	1988	ipsdienol and ipsenol	verbenone	Vb	Attraction to lure	Attraction to lure	0.48	0.11	11	0.4	0.23	11
53	6	Miller et al	1995	Canada	Verbenone: dose-dependent interruption of pheromone-based attraction of three sympatric species of pine bark beetles (coleoptera: scolytidae).	British Columbia	North-western North America	Dendroctonus ponderosae	1988	ipsdienol and ipsenol	verbenone	Vb	Attraction to lure	Attraction to lure	0.47	0.13	11	0.4	0.23	11
54	6	Miller et al	1995	Canada	Verbenone: dose-dependent interruption of pheromone-based attraction of three sympatric species of pine bark beetles (coleoptera: scolytidae).	British Columbia	North-western North America	Dendroctonus ponderosae	1988	ipsdienol and ipsenol	verbenone	Vb	Attraction to lure	Attraction to lure	0.54	0.1	11	0.4	0.23	11
55	7	Wilson et al	1996	Canada	Green leaf volatiles as antiaggregants for the mountain pine beetle, Dendroctonus ponderosae Hopkins (Coleoptera: Scolytidae).	British Columbia	North-western North America	Dendroctonus ponderosae	1995	trans-verbenol and exo-brevicomin	(E)-2-hexen-l-ol + (Z)3-hexen-l-ol	NHV	Tree attack	Tree attack	13.1	24.98	10	68.1	4.2	9
56	7	Wilson et al	1996	Canada	Green leaf volatiles as antiaggregants for the mountain pine beetle, Dendroctonus ponderosae Hopkins (Coleoptera: Scolytidae).	British Columbia	North-western North America	Dendroctonus ponderosae	1995	trans-verbenol and exo-brevicomin	(E)-2-hexen-l-ol + (Z)3-hexen-l-ol	NHV	Tree attack	Tree attack	22.5	28.14	10	84.7	40.8	9
57	7	Wilson et al	1996	Canada	Green leaf volatiles as antiaggregants for the mountain pine beetle, Dendroctonus ponderosae Hopkins (Coleoptera: Scolytidae).	British Columbia	North-western North America	Dendroctonus ponderosae	1993	trans-verbenol and exo-brevicomin+ myrcene	hexanal	NHV	Female attraction to lure	Female attraction to lure	20.4918	35.42	10	24.7723	74.02	10
58	7	Wilson et al	1996	Canada	Green leaf volatiles as antiaggregants for the mountain pine beetle, Dendroctonus ponderosae Hopkins (Coleoptera: Scolytidae).	British Columbia	North-western North America	Dendroctonus ponderosae	1993	trans-verbenol and exo-brevicomin+ myrcene	(E)-2-hexen-l-ol+(Z)3-hexen-l-ol+hexanal+(E-2-hexanal)+1 -hexanol	NHV	Female attraction to lure	Female attraction to lure	2.27687	9.5	10	24.7723	74.02	10
59	7	Wilson et al	1996	Canada	Green leaf volatiles as antiaggregants for the mountain pine beetle, Dendroctonus ponderosae Hopkins (Coleoptera: Scolytidae).	British Columbia	North-western North America	Dendroctonus ponderosae	1993	trans-verbenol and exo-brevicomin+ myrcene	hexanal	NHV	Male attraction to lure	Male attraction to lure	14.6769	35.32	10	16.8	46.12	10
60	7	Wilson et al	1996	Canada	Green leaf volatiles as antiaggregants for the mountain pine beetle, Dendroctonus ponderosae Hopkins (Coleoptera: Scolytidae).	British Columbia	North-western North America	Dendroctonus ponderosae	1993	trans-verbenol and exo-brevicomin+ myrcene	(E)-2-hexen-l-ol+(Z)3-hexen-l-ol+hexanal+(E-2-hexanal)+1 -hexanol	NHV	Male attraction to lure	Male attraction to lure	4.98462	18.1	10	16.8	46.12	10
61	7	Wilson et al	1996	Canada	Green leaf volatiles as antiaggregants for the mountain pine beetle, Dendroctonus ponderosae Hopkins (Coleoptera: Scolytidae).	British Columbia	North-western North America	Dendroctonus ponderosae	1994	trans-verbenol and exo-brevicomin+hexanal+(E-2-hexanal)	(E)-2-hexen-l-ol+(Z)3-hexen-l-ol+1-hexanol+(Z)2-hexen-l-ol	NHV	Female attraction to lure	Female attraction to lure	6.88073	8.21	20	60.3211	76.93	20
62	7	Wilson et al	1996	Canada	Green leaf volatiles as antiaggregants for the mountain pine beetle, Dendroctonus ponderosae Hopkins (Coleoptera: Scolytidae).	British Columbia	North-western North America	Dendroctonus ponderosae	1994	trans-verbenol and exo-brevicomin+hexanal+(E-2-hexanal)	(E)-2-hexen-l-ol+(Z)3-hexen-l-ol+1-hexanol+(Z)2-hexen-l-ol	NHV	Male attraction to lure	Male attraction to lure	16.0019	16.59	20	93.2282	95.42	20
63	7	Wilson et al	1996	Canada	Green leaf volatiles as antiaggregants for the mountain pine beetle, Dendroctonus ponderosae Hopkins (Coleoptera: Scolytidae).	British Columbia	North-western North America	Dendroctonus ponderosae	1994	trans-verbenol and exo-brevicomin+(E)-2-hexen-l-ol+(Z)3-hexen-l-ol+1-hexanol+(Z)2-hexen-l-ol	hexanal+(E-2-hexanal)	NHV	Female attraction to lure	Female attraction to lure	5.27859	7.87	20	6.88073	8.21	20
64	7	Wilson et al	1996	Canada	Green leaf volatiles as antiaggregants for the mountain pine beetle, Dendroctonus ponderosae Hopkins (Coleoptera: Scolytidae).	British Columbia	North-western North America	Dendroctonus ponderosae	1994	trans-verbenol and exo-brevicomin+(E)-2-hexen-l-ol+(Z)3-hexen-l-ol+1-hexanol+(Z)2-hexen-l-ol	hexanal+(E-2-hexanal)	NHV	Male attraction to lure	Male attraction to lure	11.6998	14.81	20	16.0019	16.59	20
65	7	Wilson et al	1996	Canada	Green leaf volatiles as antiaggregants for the mountain pine beetle, Dendroctonus ponderosae Hopkins (Coleoptera: Scolytidae).	British Columbia	North-western North America	Dendroctonus ponderosae	1994	trans-verbenol and exo-brevicomin+hexanol	(E)-2-hexen-l-ol+(Z)3-hexen-l-ol+(Z)2-hexen-l-ol+1-hexanol	NHV	Female attraction to lure	Female attraction to lure	1.10947	1.95	16	5.90237	4.26	16
66	7	Wilson et al	1996	Canada	Green leaf volatiles as antiaggregants for the mountain pine beetle, Dendroctonus ponderosae Hopkins (Coleoptera: Scolytidae).	British Columbia	North-western North America	Dendroctonus ponderosae	1994	trans-verbenol and exo-brevicomin+hexanol	(E)-2-hexen-l-ol+(Z)3-hexen-l-ol+(Z)2-hexen-l-ol+1-hexanol	NHV	Male attraction to lure	Male attraction to lure	2.15247	2.33	16	11.7489	10.58	16
67	7	Wilson et al	1996	Canada	Green leaf volatiles as antiaggregants for the mountain pine beetle, Dendroctonus ponderosae Hopkins (Coleoptera: Scolytidae).	British Columbia	North-western North America	Dendroctonus ponderosae	1994	trans-verbenol and exo-brevicomin+ myrcene	Verbenone	Vb	Female attraction to lure	Female attraction to lure	0.389294	1.54	10	15.8637	20.93	10
68	7	Wilson et al	1996	Canada	Green leaf volatiles as antiaggregants for the mountain pine beetle, Dendroctonus ponderosae Hopkins (Coleoptera: Scolytidae).	British Columbia	North-western North America	Dendroctonus ponderosae	1994	trans-verbenol and exo-brevicomin+ myrcene	(E)-2-hexen-l-ol+(Z)3-hexen-l-ol	NHV	Female attraction to lure	Female attraction to lure	0.583942	2.31	10	15.8637	20.93	10
69	7	Wilson et al	1996	Canada	Green leaf volatiles as antiaggregants for the mountain pine beetle, Dendroctonus ponderosae Hopkins (Coleoptera: Scolytidae).	British Columbia	North-western North America	Dendroctonus ponderosae	1994	trans-verbenol and exo-brevicomin+ myrcene	Verbenone	Vb	Male attraction to lure	Male attraction to lure	1.7734	3.27	10	21.133	24.3	10
70	7	Wilson et al	1996	Canada	Green leaf volatiles as antiaggregants for the mountain pine beetle, Dendroctonus ponderosae Hopkins (Coleoptera: Scolytidae).	British Columbia	North-western North America	Dendroctonus ponderosae	1994	trans-verbenol and exo-brevicomin+ myrcene	(E)-2-hexen-l-ol+(Z)3-hexen-l-ol	NHV	Male attraction to lure	Male attraction to lure	1.42857	2.03	10	21.133	24.3	10
71	7	Wilson et al	1996	Canada	Green leaf volatiles as antiaggregants for the mountain pine beetle, Dendroctonus ponderosae Hopkins (Coleoptera: Scolytidae).	British Columbia	North-western North America	Dendroctonus ponderosae	1994	trans-verbenol and exo-brevicomin+ myrcene	Verbenone+(E)-2-hexen-l-ol+(Z)3-hexen-l-ol	Vb+NHV	Male attraction to lure	Male attraction to lure	0.640394	1.25	10	21.133	24.3	10
72	8	Savoie et al	1998	Canada	Aggregation pheromone of Pityogenes knechteli and semiochemical-based interactions with three other bark beetles.	British Columbia	North-western North America	Ips pini	1994	(±)-ipsdienol + hexanol	ipsenol	Hetro	Male attraction to lure	Male attraction to lure	0.1	0.32	10	0.3	0.63	10
73	8	Savoie et al	1998	Canada	Aggregation pheromone of Pityogenes knechteli and semiochemical-based interactions with three other bark beetles.	British Columbia	North-western North America	Ips pini	1994	(±)-ipsdienol + hexanol	ipsenol	Hetro	Female attraction to lure	Female attraction to lure	0.7	1.26	10	4	4.43	10
74	8	Savoie et al	1998	Canada	Aggregation pheromone of Pityogenes knechteli and semiochemical-based interactions with three other bark beetles.	British Columbia	North-western North America	Ips pini	1994	(±)-ipsdienol + hexanol	ipsdienol	Homo	Male attraction to lure	Male attraction to lure	0.2	0.63	10	2.5	1.58	10
75	8	Savoie et al	1998	Canada	Aggregation pheromone of Pityogenes knechteli and semiochemical-based interactions with three other bark beetles.	British Columbia	North-western North America	Ips pini	1994	(±)-ipsdienol + hexanol	ipsdienol	Homo	Male attraction to lure	Male attraction to lure	0.4	0.63	10	2.5	1.58	10
76	8	Savoie et al	1998	Canada	Aggregation pheromone of Pityogenes knechteli and semiochemical-based interactions with three other bark beetles.	British Columbia	North-western North America	Ips pini	1994	(±)-ipsdienol + hexanol	ipsdienol	Homo	Female attraction to lure	Female attraction to lure	0.9	0.95	10	7.5	5.69	10
77	8	Savoie et al	1998	Canada	Aggregation pheromone of Pityogenes knechteli and semiochemical-based interactions with three other bark beetles.	British Columbia	North-western North America	Ips pini	1994	(±)-ipsdienol + hexanol	ipsdienol	Homo	Female attraction to lure	Female attraction to lure	0.1	0.32	10	7.5	5.69	10
78	8	Savoie et al	1998	Canada	Aggregation pheromone of Pityogenes knechteli and semiochemical-based interactions with three other bark beetles.	British Columbia	North-western North America	Ips pini	1995	(±)-ipsdienol	ipsenol	Hetro	Male attraction to lure	Male attraction to lure	0.2	0.63	10	13.1	10.75	10
79	8	Savoie et al	1998	Canada	Aggregation pheromone of Pityogenes knechteli and semiochemical-based interactions with three other bark beetles.	British Columbia	North-western North America	Ips pini	1995	(±)-ipsdienol	ipsenol	Hetro	Female attraction to lure	Female attraction to lure	1.7	2.53	10	45	34.47	10
80	8	Savoie et al	1998	Canada	Aggregation pheromone of Pityogenes knechteli and semiochemical-based interactions with three other bark beetles.	British Columbia	North-western North America	Ips latidens	1995	(S)-(-)-ipsenol	ipsdienol	Hetro	Male attraction to lure	Male attraction to lure	1	1.26	10	9.2	8.54	10
81	8	Savoie et al	1998	Canada	Aggregation pheromone of Pityogenes knechteli and semiochemical-based interactions with three other bark beetles.	British Columbia	North-western North America	Ips latidens	1995	(S)-(-)-ipsenol	ipsdienol	Hetro	Female attraction to lure	Female attraction to lure	0.3	0.63	10	14.2	15.81	10
82	8	Savoie et al	1998	Canada	Aggregation pheromone of Pityogenes knechteli and semiochemical-based interactions with three other bark beetles.	British Columbia	North-western North America	Ips mexicanus	1995	(S)-(-)-ipsenol	ipsdienol	Hetro	Male attraction to lure	Male attraction to lure	10.9	6.32	10	7.4	3.79	10
83	8	Savoie et al	1998	Canada	Aggregation pheromone of Pityogenes knechteli and semiochemical-based interactions with three other bark beetles.	British Columbia	North-western North America	Ips mexicanus	1995	(S)-(-)-ipsenol	ipsdienol	Hetro	Female attraction to lure	Female attraction to lure	26.6	11.7	10	10	5.38	10
84	8	Savoie et al	1998	Canada	Aggregation pheromone of Pityogenes knechteli and semiochemical-based interactions with three other bark beetles.	British Columbia	North-western North America	Ips pini	1994	(±)-ipsdienol	hexanol	Hetro	Male attraction to lure	Male attraction to lure	3.3	4.43	10	3.3	1.9	10
85	8	Savoie et al	1998	Canada	Aggregation pheromone of Pityogenes knechteli and semiochemical-based interactions with three other bark beetles.	British Columbia	North-western North America	Ips pini	1994	(±)-ipsdienol	hexanol	Hetro	Male attraction to lure	Male attraction to lure	2.3	1.9	10	3.3	1.9	10
86	8	Savoie et al	1998	Canada	Aggregation pheromone of Pityogenes knechteli and semiochemical-based interactions with three other bark beetles.	British Columbia	North-western North America	Ips pini	1994	(±)-ipsdienol	hexanol	Hetro	Male attraction to lure	Male attraction to lure	2	1.58	10	3.3	1.9	10
87	8	Savoie et al	1998	Canada	Aggregation pheromone of Pityogenes knechteli and semiochemical-based interactions with three other bark beetles.	British Columbia	North-western North America	Ips pini	1994	(±)-ipsdienol	hexanol	Hetro	Female attraction to lure	Female attraction to lure	12.8	12.65	10	10.7	6.96	10
88	8	Savoie et al	1998	Canada	Aggregation pheromone of Pityogenes knechteli and semiochemical-based interactions with three other bark beetles.	British Columbia	North-western North America	Ips pini	1994	(±)-ipsdienol	hexanol	Hetro	Female attraction to lure	Female attraction to lure	6.2	5.06	10	10.7	6.96	10
89	8	Savoie et al	1998	Canada	Aggregation pheromone of Pityogenes knechteli and semiochemical-based interactions with three other bark beetles.	British Columbia	North-western North America	Ips pini	1994	(±)-ipsdienol	hexanol	Hetro	Female attraction to lure	Female attraction to lure	5.8	3.48	10	10.7	6.96	10
90	8	Savoie et al	1998	Canada	Aggregation pheromone of Pityogenes knechteli and semiochemical-based interactions with three other bark beetles.	British Columbia	North-western North America	Ips mexicanus	1995	(S)-(-)-ipsenol + (±)-ipsdienol	hexanol	Hetro	Male attraction to lure	Male attraction to lure	11.3	8.22	10	10.1	8.22	10
91	8	Savoie et al	1998	Canada	Aggregation pheromone of Pityogenes knechteli and semiochemical-based interactions with three other bark beetles.	British Columbia	North-western North America	Ips mexicanus	1995	(S)-(-)-ipsenol + (±)-ipsdienol	hexanol	Hetro	Male attraction to lure	Male attraction to lure	4.9	3.16	10	10.1	8.22	10
92	8	Savoie et al	1998	Canada	Aggregation pheromone of Pityogenes knechteli and semiochemical-based interactions with three other bark beetles.	British Columbia	North-western North America	Ips mexicanus	1995	(S)-(-)-ipsenol + (±)-ipsdienol	hexanol	Hetro	Female attraction to lure	Female attraction to lure	28.3	18.02	10	31.9	20.87	10
93	8	Savoie et al	1998	Canada	Aggregation pheromone of Pityogenes knechteli and semiochemical-based interactions with three other bark beetles.	British Columbia	North-western North America	Ips mexicanus	1995	(S)-(-)-ipsenol + (±)-ipsdienol	hexanol	Hetro	Female attraction to lure	Female attraction to lure	14.7	12.33	10	31.9	20.87	10
94	9	Strom et al	1999	USA	Visual and semiochemical disruption of host finding in the southern pine beetle.	Floridia	South-eastern North America	Dendroctonus frontalis	1996	Frontalure	Verbenone	Vb	Attraction to lure	Attraction to lure	89.5445	71.69	12	87.9826	67.18	12
95	9	Strom et al	1999	USA	Visual and semiochemical disruption of host finding in the southern pine beetle.	Floridia	South-eastern North America	Dendroctonus frontalis	1996	Frontalure	4-allylanisole	Host Repellent	Attraction to lure	Attraction to lure	38.9154	36.52	12	87.9826	67.18	12
96	9	Strom et al	1999	USA	Visual and semiochemical disruption of host finding in the southern pine beetle.	Louisiana	South-eastern North America	Dendroctonus frontalis	1996	Frontalure	Verbenone	Vb	Attraction to lure	Attraction to lure	30.655	26.32	12	33.9301	19.67	12
97	9	Strom et al	1999	USA	Visual and semiochemical disruption of host finding in the southern pine beetle.	Louisiana	South-eastern North America	Dendroctonus frontalis	1996	Frontalure	4-allylanisole	Host Repellent	Attraction to lure	Attraction to lure	18.69	14.07	12	33.9301	19.67	12
98	10	Paine et al	1999	California	Identification of semiochemicals associated with Jeffrey Pine Beetle, Dendroctonus jeffreyi.	California	South-western North America	Dendroctonus jeffreyi	1993	1-HEPTANOL IN HEPTANE	exo-Brevicomin	Homo	Attraction to lure	Attraction to lure	3.21	3.35	40	4.98	4.62	39
99	10	Paine et al	1999	California	Identification of semiochemicals associated with Jeffrey Pine Beetle, Dendroctonus jeffreyi.	California	South-western North America	Dendroctonus jeffreyi	1993	1-HEPTANOL IN HEPTANE	exo-brevicomin + frontalin	Homo	Attraction to lure	Attraction to lure	0.34	0.57	40	4.98	4.62	39
100	10	Paine et al	1999	California	Identification of semiochemicals associated with Jeffrey Pine Beetle, Dendroctonus jeffreyi.	California	South-western North America	Dendroctonus jeffreyi	1993	1-HEPTANOL IN HEPTANE	frontalin	Homo	Attraction to lure	Attraction to lure	0.3	0.57	40	4.98	4.62	39
101	10	Paine et al	1999	California	Identification of semiochemicals associated with Jeffrey Pine Beetle, Dendroctonus jeffreyi.	California	South-western North America	Dendroctonus jeffreyi	1993	1-HEPTANOL IN HEPTANE	frontalin	Homo	Female attraction to lure	Female attraction to lure	0.75	1.04	12	1.42	2.08	12
102	10	Paine et al	1999	California	Identification of semiochemicals associated with Jeffrey Pine Beetle, Dendroctonus jeffreyi.	California	South-western North America	Dendroctonus jeffreyi	1993	1-HEPTANOL IN HEPTANE	frontalin	Homo	Female attraction to lure	Female attraction to lure	1.58	1.56	12	1.42	2.08	12
103	10	Paine et al	1999	California	Identification of semiochemicals associated with Jeffrey Pine Beetle, Dendroctonus jeffreyi.	California	South-western North America	Dendroctonus jeffreyi	1993	1-HEPTANOL IN HEPTANE	frontalin	Homo	Female attraction to lure	Female attraction to lure	1.25	1.49	12	1.42	2.08	12
104	10	Paine et al	1999	California	Identification of semiochemicals associated with Jeffrey Pine Beetle, Dendroctonus jeffreyi.	California	South-western North America	Dendroctonus jeffreyi	1993	1-HEPTANOL IN HEPTANE	frontalin	Homo	Female attraction to lure	Female attraction to lure	0.5	0.66	12	1.42	2.08	12
105	10	Paine et al	1999	California	Identification of semiochemicals associated with Jeffrey Pine Beetle, Dendroctonus jeffreyi.	California	South-western North America	Dendroctonus jeffreyi	1993	1-HEPTANOL IN HEPTANE	frontalin	Homo	Male attraction to lure	Male attraction to lure	1.08	1.18	12	1.42	1.73	12
106	10	Paine et al	1999	California	Identification of semiochemicals associated with Jeffrey Pine Beetle, Dendroctonus jeffreyi.	California	South-western North America	Dendroctonus jeffreyi	1993	1-HEPTANOL IN HEPTANE	frontalin	Homo	Male attraction to lure	Male attraction to lure	1.58	1.66	12	1.42	1.73	12
107	10	Paine et al	1999	California	Identification of semiochemicals associated with Jeffrey Pine Beetle, Dendroctonus jeffreyi.	California	South-western North America	Dendroctonus jeffreyi	1993	1-HEPTANOL IN HEPTANE	frontalin	Homo	Male attraction to lure	Male attraction to lure	1	1.28	12	1.42	1.73	12
108	10	Paine et al	1999	California	Identification of semiochemicals associated with Jeffrey Pine Beetle, Dendroctonus jeffreyi.	California	South-western North America	Dendroctonus jeffreyi	1993	1-HEPTANOL IN HEPTANE	frontalin	Homo	Male attraction to lure	Male attraction to lure	0.83	1.11	12	1.42	1.73	12
109	10	Paine et al	1999	California	Identification of semiochemicals associated with Jeffrey Pine Beetle, Dendroctonus jeffreyi.	California	South-western North America	Dendroctonus jeffreyi	1993	1-HEPTANOL IN HEPTANE	frontalin	Homo	Male attraction to lure	Male attraction to lure	0.09	0.3	11	1.42	1.73	12
110	10	Paine et al	1999	California	Identification of semiochemicals associated with Jeffrey Pine Beetle, Dendroctonus jeffreyi.	California	South-western North America	Dendroctonus jeffreyi	1993	1-HEPTANOL IN HEPTANE	frontalin	Homo	Attraction to lure	Attraction to lure	1.83	1.59	12	2.83	3.01	12
111	10	Paine et al	1999	California	Identification of semiochemicals associated with Jeffrey Pine Beetle, Dendroctonus jeffreyi.	California	South-western North America	Dendroctonus jeffreyi	1993	1-HEPTANOL IN HEPTANE	frontalin	Homo	Attraction to lure	Attraction to lure	3.17	2.81	12	2.83	3.01	12
112	10	Paine et al	1999	California	Identification of semiochemicals associated with Jeffrey Pine Beetle, Dendroctonus jeffreyi.	California	South-western North America	Dendroctonus jeffreyi	1993	1-HEPTANOL IN HEPTANE	frontalin	Homo	Attraction to lure	Attraction to lure	2.25	2.22	12	2.83	3.01	12
113	10	Paine et al	1999	California	Identification of semiochemicals associated with Jeffrey Pine Beetle, Dendroctonus jeffreyi.	California	South-western North America	Dendroctonus jeffreyi	1993	1-HEPTANOL IN HEPTANE	frontalin	Homo	Attraction to lure	Attraction to lure	1.33	1.32	12	2.83	3.01	12
114	10	Paine et al	1999	California	Identification of semiochemicals associated with Jeffrey Pine Beetle, Dendroctonus jeffreyi.	California	South-western North America	Dendroctonus jeffreyi	1993	1-HEPTANOL IN HEPTANE	frontalin	Homo	Attraction to lure	Attraction to lure	0.09	0.3	11	2.83	3.01	12
115	10	Paine et al	1999	California	Identification of semiochemicals associated with Jeffrey Pine Beetle, Dendroctonus jeffreyi.	California	South-western North America	Dendroctonus jeffreyi	1993	1-HEPTANOL IN HEPTANE	exo-brevicomin + frontalin	Homo	Female attraction to lure	Female attraction to lure	1.67	2.04	12	0.63	0.66	11
116	10	Paine et al	1999	California	Identification of semiochemicals associated with Jeffrey Pine Beetle, Dendroctonus jeffreyi.	California	South-western North America	Dendroctonus jeffreyi	1993	1-HEPTANOL IN HEPTANE	exo-brevicomin + frontalin	Homo	Female attraction to lure	Female attraction to lure	1.72	3.58	11	0.63	0.66	11
117	10	Paine et al	1999	California	Identification of semiochemicals associated with Jeffrey Pine Beetle, Dendroctonus jeffreyi.	California	South-western North America	Dendroctonus jeffreyi	1993	1-HEPTANOL IN HEPTANE	exo-brevicomin + frontalin	Homo	Female attraction to lure	Female attraction to lure	2	1.19	11	0.63	0.66	11
118	10	Paine et al	1999	California	Identification of semiochemicals associated with Jeffrey Pine Beetle, Dendroctonus jeffreyi.	California	South-western North America	Dendroctonus jeffreyi	1993	1-HEPTANOL IN HEPTANE	exo-brevicomin + frontalin	Homo	Female attraction to lure	Female attraction to lure	0.17	0.38	12	0.63	0.66	11
119	10	Paine et al	1999	California	Identification of semiochemicals associated with Jeffrey Pine Beetle, Dendroctonus jeffreyi.	California	South-western North America	Dendroctonus jeffreyi	1993	1-HEPTANOL IN HEPTANE	exo-brevicomin + frontalin	Homo	Male attraction to lure	Male attraction to lure	1.33	1.32	12	1.27	1.09	11
120	10	Paine et al	1999	California	Identification of semiochemicals associated with Jeffrey Pine Beetle, Dendroctonus jeffreyi.	California	South-western North America	Dendroctonus jeffreyi	1993	1-HEPTANOL IN HEPTANE	exo-brevicomin + frontalin	Homo	Male attraction to lure	Male attraction to lure	1.18	1.99	11	1.27	1.09	11
121	10	Paine et al	1999	California	Identification of semiochemicals associated with Jeffrey Pine Beetle, Dendroctonus jeffreyi.	California	South-western North America	Dendroctonus jeffreyi	1993	1-HEPTANOL IN HEPTANE	exo-brevicomin + frontalin	Homo	Male attraction to lure	Male attraction to lure	1.09	1.92	11	1.27	1.09	11
122	10	Paine et al	1999	California	Identification of semiochemicals associated with Jeffrey Pine Beetle, Dendroctonus jeffreyi.	California	South-western North America	Dendroctonus jeffreyi	1993	1-HEPTANOL IN HEPTANE	exo-brevicomin + frontalin	Homo	Male attraction to lure	Male attraction to lure	0.83	1.32	12	1.27	1.09	11
123	10	Paine et al	1999	California	Identification of semiochemicals associated with Jeffrey Pine Beetle, Dendroctonus jeffreyi.	California	South-western North America	Dendroctonus jeffreyi	1993	1-HEPTANOL IN HEPTANE	exo-brevicomin + frontalin	Homo	Male attraction to lure	Male attraction to lure	0.08	0.28	12	1.27	1.09	11
124	10	Paine et al	1999	California	Identification of semiochemicals associated with Jeffrey Pine Beetle, Dendroctonus jeffreyi.	California	South-western North America	Dendroctonus jeffreyi	1993	1-HEPTANOL IN HEPTANE	exo-brevicomin + frontalin	Homo	Attraction to lure	Attraction to lure	3	2.49	12	1.91	0.36	11
125	10	Paine et al	1999	California	Identification of semiochemicals associated with Jeffrey Pine Beetle, Dendroctonus jeffreyi.	California	South-western North America	Dendroctonus jeffreyi	1993	1-HEPTANOL IN HEPTANE	exo-brevicomin + frontalin	Homo	Attraction to lure	Attraction to lure	2.91	3.58	11	1.91	0.36	11
126	10	Paine et al	1999	California	Identification of semiochemicals associated with Jeffrey Pine Beetle, Dendroctonus jeffreyi.	California	South-western North America	Dendroctonus jeffreyi	1993	1-HEPTANOL IN HEPTANE	exo-brevicomin + frontalin	Homo	Attraction to lure	Attraction to lure	3.09	2.82	11	1.91	0.36	11
127	10	Paine et al	1999	California	Identification of semiochemicals associated with Jeffrey Pine Beetle, Dendroctonus jeffreyi.	California	South-western North America	Dendroctonus jeffreyi	1993	1-HEPTANOL IN HEPTANE	exo-brevicomin + frontalin	Homo	Attraction to lure	Attraction to lure	1	3.01	12	1.91	0.36	11
128	10	Paine et al	1999	California	Identification of semiochemicals associated with Jeffrey Pine Beetle, Dendroctonus jeffreyi.	California	South-western North America	Dendroctonus jeffreyi	1993	1-HEPTANOL IN HEPTANE	exo-brevicomin + frontalin	Homo	Attraction to lure	Attraction to lure	0.08	0.28	12	1.91	0.36	11
129	11	Pureswaran et al	2000	Canada	Dynamics of pheromone production and communication in the mountain pine beetle, Dendroctonus ponderosae Hopkins, and the pine engraver, Ips pini (Say) (Coleoptera: Scolytidae).	British Columbia	North-western North America	Dendroctonus ponderosae	1998	myrcene+exo-brevicomin+trans-verbenol	2-phenylethanol	Homo	Female attraction to lure	Female attraction to lure	1.43126	1.38	10	6.65913	4.62	10
130	11	Pureswaran et al	2000	Canada	Dynamics of pheromone production and communication in the mountain pine beetle, Dendroctonus ponderosae Hopkins, and the pine engraver, Ips pini (Say) (Coleoptera: Scolytidae).	British Columbia	North-western North America	Dendroctonus ponderosae	1998	myrcene+exo-brevicomin+trans-verbenol	2-phenylethanol	Homo	Male attraction to lure	Male attraction to lure	0.664307	0.87	11	2.5541	1.8	11
131	11	Pureswaran et al	2000	Canada	Dynamics of pheromone production and communication in the mountain pine beetle, Dendroctonus ponderosae Hopkins, and the pine engraver, Ips pini (Say) (Coleoptera: Scolytidae).	British Columbia	North-western North America	Dendroctonus ponderosae	1998	myrcene+exo-brevicomin+trans-verbenol	p-cymene	Homo	Female attraction to lure	Female attraction to lure	26.1615	15.5	10	24.7731	26.43	10
132	11	Pureswaran et al	2000	Canada	Dynamics of pheromone production and communication in the mountain pine beetle, Dendroctonus ponderosae Hopkins, and the pine engraver, Ips pini (Say) (Coleoptera: Scolytidae).	British Columbia	North-western North America	Dendroctonus ponderosae	1998	myrcene+exo-brevicomin+trans-verbenol	p-cymene	Homo	Male attraction to lure	Male attraction to lure	29.1508	19.51	10	30.052	26.96	10
133	11	Pureswaran et al	2000	Canada	Dynamics of pheromone production and communication in the mountain pine beetle, Dendroctonus ponderosae Hopkins, and the pine engraver, Ips pini (Say) (Coleoptera: Scolytidae).	British Columbia	North-western North America	Dendroctonus ponderosae	1998	myrcene+exo-brevicomin+trans-verbenol	acetophenone	Homo	Female attraction to lure	Female attraction to lure	27.2905	17.6	11	22.8492	16.4	11
134	11	Pureswaran et al	2000	Canada	Dynamics of pheromone production and communication in the mountain pine beetle, Dendroctonus ponderosae Hopkins, and the pine engraver, Ips pini (Say) (Coleoptera: Scolytidae).	British Columbia	North-western North America	Dendroctonus ponderosae	1998	myrcene+exo-brevicomin+trans-verbenol	acetophenone	Homo	Male attraction to lure	Male attraction to lure	32.404	16.28	11	40.3673	31.23	11
135	11	Pureswaran et al	2000	Canada	Dynamics of pheromone production and communication in the mountain pine beetle, Dendroctonus ponderosae Hopkins, and the pine engraver, Ips pini (Say) (Coleoptera: Scolytidae).	British Columbia	North-western North America	Dendroctonus ponderosae	1998	myrcene+exo-brevicomin+trans-verbenol	limonene oxide	Homo	Female attraction to lure	Female attraction to lure	43.2719	18.65	11	39.1244	22.47	11
136	11	Pureswaran et al	2000	Canada	Dynamics of pheromone production and communication in the mountain pine beetle, Dendroctonus ponderosae Hopkins, and the pine engraver, Ips pini (Say) (Coleoptera: Scolytidae).	British Columbia	North-western North America	Dendroctonus ponderosae	1998	myrcene+exo-brevicomin+trans-verbenol	limonene oxide	Homo	Male attraction to lure	Male attraction to lure	50.9515	27.87	11	43.6804	17.68	11
137	11	Pureswaran et al	2000	Canada	Dynamics of pheromone production and communication in the mountain pine beetle, Dendroctonus ponderosae Hopkins, and the pine engraver, Ips pini (Say) (Coleoptera: Scolytidae).	British Columbia	North-western North America	Dendroctonus ponderosae	1998	myrcene+exo-brevicomin+trans-verbenol	1-phenylethanol	Hetro	Female attraction to lure	Female attraction to lure	3.66559	4.59	11	2.66881	1.53	11
138	11	Pureswaran et al	2000	Canada	Dynamics of pheromone production and communication in the mountain pine beetle, Dendroctonus ponderosae Hopkins, and the pine engraver, Ips pini (Say) (Coleoptera: Scolytidae).	British Columbia	North-western North America	Dendroctonus ponderosae	1998	myrcene+exo-brevicomin+trans-verbenol	1-phenylethanol	Hetro	Male attraction to lure	Male attraction to lure	1.11942	1.17	10	1.13381	1.07	10
139	11	Pureswaran et al	2000	Canada	Dynamics of pheromone production and communication in the mountain pine beetle, Dendroctonus ponderosae Hopkins, and the pine engraver, Ips pini (Say) (Coleoptera: Scolytidae).	British Columbia	North-western North America	Dendroctonus ponderosae	1998	myrcene+exo-brevicomin+trans-verbenol	borneol	Homo	Female attraction to lure	Female attraction to lure	29.795	21.66	11	24.2065	15.11	11
140	11	Pureswaran et al	2000	Canada	Dynamics of pheromone production and communication in the mountain pine beetle, Dendroctonus ponderosae Hopkins, and the pine engraver, Ips pini (Say) (Coleoptera: Scolytidae).	British Columbia	North-western North America	Dendroctonus ponderosae	1998	myrcene+exo-brevicomin+trans-verbenol	borneol	Homo	Male attraction to lure	Male attraction to lure	27.9332	20.36	11	30.2505	19.42	11
141	11	Pureswaran et al	2000	Canada	Dynamics of pheromone production and communication in the mountain pine beetle, Dendroctonus ponderosae Hopkins, and the pine engraver, Ips pini (Say) (Coleoptera: Scolytidae).	British Columbia	North-western North America	Dendroctonus ponderosae	1998	myrcene+exo-brevicomin+trans-verbenol	myrtenol	Hetro	Female attraction to lure	Female attraction to lure	4.29715	2.45	10	4.6121	4.02	10
142	11	Pureswaran et al	2000	Canada	Dynamics of pheromone production and communication in the mountain pine beetle, Dendroctonus ponderosae Hopkins, and the pine engraver, Ips pini (Say) (Coleoptera: Scolytidae).	British Columbia	North-western North America	Dendroctonus ponderosae	1998	myrcene+exo-brevicomin+trans-verbenol	myrtenol	Hetro	Male attraction to lure	Male attraction to lure	2.41395	1.88	10	1.43442	1.39	10
143	11	Pureswaran et al	2000	Canada	Dynamics of pheromone production and communication in the mountain pine beetle, Dendroctonus ponderosae Hopkins, and the pine engraver, Ips pini (Say) (Coleoptera: Scolytidae).	British Columbia	North-western North America	Ips pini	1998	ipsdienol	nonanal	Homo	Female attraction to lure	Female attraction to lure	2.66667	2.88	11	5.69317	3.15	11
144	11	Pureswaran et al	2000	Canada	Dynamics of pheromone production and communication in the mountain pine beetle, Dendroctonus ponderosae Hopkins, and the pine engraver, Ips pini (Say) (Coleoptera: Scolytidae).	British Columbia	North-western North America	Ips pini	1998	ipsdienol	nonanal	Homo	Male attraction to lure	Male attraction to lure	1.05882	2.01	10	4.03982	2.56	10
145	11	Pureswaran et al	2000	Canada	Dynamics of pheromone production and communication in the mountain pine beetle, Dendroctonus ponderosae Hopkins, and the pine engraver, Ips pini (Say) (Coleoptera: Scolytidae).	British Columbia	North-western North America	Ips pini	1998	ipsdienol	exo-brevicomin	Hetro	Female attraction to lure	Female attraction to lure	93.0451	46.76	11	240.226	196.38	11
146	11	Pureswaran et al	2000	Canada	Dynamics of pheromone production and communication in the mountain pine beetle, Dendroctonus ponderosae Hopkins, and the pine engraver, Ips pini (Say) (Coleoptera: Scolytidae).	British Columbia	North-western North America	Ips pini	1998	ipsdienol	exo-brevicomin	Hetro	Male attraction to lure	Male attraction to lure	44	14.29	11	115.231	130.11	11
147	11	Pureswaran et al	2000	Canada	Dynamics of pheromone production and communication in the mountain pine beetle, Dendroctonus ponderosae Hopkins, and the pine engraver, Ips pini (Say) (Coleoptera: Scolytidae).	British Columbia	North-western North America	Ips pini	1998	ipsdienol	endo-brevicomin	Hetro	Female attraction to lure	Female attraction to lure	7.88489	4.96	11	13.3957	8.45	11
148	11	Pureswaran et al	2000	Canada	Dynamics of pheromone production and communication in the mountain pine beetle, Dendroctonus ponderosae Hopkins, and the pine engraver, Ips pini (Say) (Coleoptera: Scolytidae).	British Columbia	North-western North America	Ips pini	1998	ipsdienol	endo-brevicomin	Hetro	Male attraction to lure	Male attraction to lure	3.36911	3.36	11	9.8	7.13	11
149	11	Pureswaran et al	2000	Canada	Dynamics of pheromone production and communication in the mountain pine beetle, Dendroctonus ponderosae Hopkins, and the pine engraver, Ips pini (Say) (Coleoptera: Scolytidae).	British Columbia	North-western North America	Ips pini	1998	ipsdienol	limonene oxide	Hetro	Female attraction to lure	Female attraction to lure	5.05263	5.23	8	3.77567	4.94	8
150	11	Pureswaran et al	2000	Canada	Dynamics of pheromone production and communication in the mountain pine beetle, Dendroctonus ponderosae Hopkins, and the pine engraver, Ips pini (Say) (Coleoptera: Scolytidae).	British Columbia	North-western North America	Ips pini	1998	ipsdienol	limonene oxide	Hetro	Male attraction to lure	Male attraction to lure	4.03975	3.51	8	2.56121	3.41	8
151	11	Pureswaran et al	2000	Canada	Dynamics of pheromone production and communication in the mountain pine beetle, Dendroctonus ponderosae Hopkins, and the pine engraver, Ips pini (Say) (Coleoptera: Scolytidae).	British Columbia	North-western North America	Ips pini	1998	ipsdienol	acetophenone	Homo	Female attraction to lure	Female attraction to lure	43.4296	30.71	11	52.9603	35.02	11
152	11	Pureswaran et al	2000	Canada	Dynamics of pheromone production and communication in the mountain pine beetle, Dendroctonus ponderosae Hopkins, and the pine engraver, Ips pini (Say) (Coleoptera: Scolytidae).	British Columbia	North-western North America	Ips pini	1998	ipsdienol	acetophenone	Homo	Male attraction to lure	Male attraction to lure	21.7871	16.39	11	28.4071	20.93	11
153	11	Pureswaran et al	2000	Canada	Dynamics of pheromone production and communication in the mountain pine beetle, Dendroctonus ponderosae Hopkins, and the pine engraver, Ips pini (Say) (Coleoptera: Scolytidae).	British Columbia	North-western North America	Ips pini	1998	ipsdienol	1-phenylethanol	Homo	Female attraction to lure	Female attraction to lure	5.42748	6.66	11	4.66002	3.28	11
154	11	Pureswaran et al	2000	Canada	Dynamics of pheromone production and communication in the mountain pine beetle, Dendroctonus ponderosae Hopkins, and the pine engraver, Ips pini (Say) (Coleoptera: Scolytidae).	British Columbia	North-western North America	Ips pini	1998	ipsdienol	1-phenylethanol	Homo	Male attraction to lure	Male attraction to lure	3.36915	3.03	9	3.58404	3.47	9
155	11	Pureswaran et al	2000	Canada	Dynamics of pheromone production and communication in the mountain pine beetle, Dendroctonus ponderosae Hopkins, and the pine engraver, Ips pini (Say) (Coleoptera: Scolytidae).	British Columbia	North-western North America	Ips pini	1998	ipsdienol	2-phenylethanol	Homo	Female attraction to lure	Female attraction to lure	1.01204	0.9	9	1.44522	1.63	9
156	11	Pureswaran et al	2000	Canada	Dynamics of pheromone production and communication in the mountain pine beetle, Dendroctonus ponderosae Hopkins, and the pine engraver, Ips pini (Say) (Coleoptera: Scolytidae).	British Columbia	North-western North America	Ips pini	1998	ipsdienol	2-phenylethanol	Homo	Male attraction to lure	Male attraction to lure	0.687591	0.47	6	0.686496	1.2	6
157	11	Pureswaran et al	2000	Canada	Dynamics of pheromone production and communication in the mountain pine beetle, Dendroctonus ponderosae Hopkins, and the pine engraver, Ips pini (Say) (Coleoptera: Scolytidae).	British Columbia	North-western North America	Ips pini	1998	ipsdienol	borneol	Homo	Female attraction to lure	Female attraction to lure	105.973	54.88	11	96.6575	58.52	11
158	11	Pureswaran et al	2000	Canada	Dynamics of pheromone production and communication in the mountain pine beetle, Dendroctonus ponderosae Hopkins, and the pine engraver, Ips pini (Say) (Coleoptera: Scolytidae).	British Columbia	North-western North America	Ips pini	1998	ipsdienol	borneol	Homo	Male attraction to lure	Male attraction to lure	80.4619	57.6	11	60.0462	48.1	11
159	11	Pureswaran et al	2000	Canada	Dynamics of pheromone production and communication in the mountain pine beetle, Dendroctonus ponderosae Hopkins, and the pine engraver, Ips pini (Say) (Coleoptera: Scolytidae).	British Columbia	North-western North America	Ips pini	1998	ipsdienol	myrtenol	Homo	Female attraction to lure	Female attraction to lure	8.96118	11	11	10.6802	5.33	11
160	11	Pureswaran et al	2000	Canada	Dynamics of pheromone production and communication in the mountain pine beetle, Dendroctonus ponderosae Hopkins, and the pine engraver, Ips pini (Say) (Coleoptera: Scolytidae).	British Columbia	North-western North America	Ips pini	1998	ipsdienol	myrtenol	Homo	Male attraction to lure	Male attraction to lure	5.06386	2.25	11	6.02102	3.24	11
161	12	Miller	2000	Canada	Vertical displacement of Ips latidens and Ips pini (Coleoptera: Scolytidae) by semiochemical interruption.	British Columbia	North-western North America	Ips latidens	1986	(±)-ipsenol	ipsdienol	Hetro	Attraction to lure	Attraction to lure	1.00791	2.13	4	42.2021	38.24	4
162	12	Miller	2000	Canada	Vertical displacement of Ips latidens and Ips pini (Coleoptera: Scolytidae) by semiochemical interruption.	British Columbia	North-western North America	Ips latidens	1986	(±)-ipsenol	ipsdienol	Hetro	Attraction to lure	Attraction to lure	1.95652	2.25	4	51.2953	39.75	4
163	12	Miller	2000	Canada	Vertical displacement of Ips latidens and Ips pini (Coleoptera: Scolytidae) by semiochemical interruption.	British Columbia	North-western North America	Ips latidens	1986	(±)-ipsenol	ipsdienol	Hetro	Attraction to lure	Attraction to lure	1.00791	2.13	4	18.0237	8.3	4
164	12	Miller	2000	Canada	Vertical displacement of Ips latidens and Ips pini (Coleoptera: Scolytidae) by semiochemical interruption.	British Columbia	North-western North America	Ips latidens	1986	(±)-ipsenol	ipsdienol	Hetro	Attraction to lure	Attraction to lure	1.00791	2.13	4	16.9565	12.21	4
165	12	Miller	2000	Canada	Vertical displacement of Ips latidens and Ips pini (Coleoptera: Scolytidae) by semiochemical interruption.	British Columbia	North-western North America	Ips latidens	1986	(±)-ipsenol	ipsdienol	Hetro	Attraction to lure	Attraction to lure	1.95652	2.25	4	16.9565	12.21	4
166	12	Miller	2000	Canada	Vertical displacement of Ips latidens and Ips pini (Coleoptera: Scolytidae) by semiochemical interruption.	British Columbia	North-western North America	Ips latidens	1986	(±)-ipsenol	ipsdienol	Hetro	Attraction to lure	Attraction to lure	1.95652	2.25	4	18.0237	8.3	4
167	12	Miller	2000	Canada	Vertical displacement of Ips latidens and Ips pini (Coleoptera: Scolytidae) by semiochemical interruption.	British Columbia	North-western North America	Ips pini	1986	(±)-ipsdienol	(±)-exo-brevicomin+ cis-and trans-verhenol	Hetro	Attraction to lure	Attraction to lure	8.56531	10.71	4	107.518	100.93	4
168	12	Miller	2000	Canada	Vertical displacement of Ips latidens and Ips pini (Coleoptera: Scolytidae) by semiochemical interruption.	British Columbia	North-western North America	Ips pini	1986	(±)-ipsdienol	(±)-exo-brevicomin+ cis-and trans-verhenol	Hetro	Attraction to lure	Attraction to lure	8.56531	10.71	4	69.379	60.81	4
169	12	Miller	2000	Canada	Vertical displacement of Ips latidens and Ips pini (Coleoptera: Scolytidae) by semiochemical interruption.	British Columbia	North-western North America	Ips pini	1986	(±)-ipsdienol	(±)-exo-brevicomin+ cis-and trans-verhenol	Hetro	Attraction to lure	Attraction to lure	8.56531	10.71	4	99.1435	131.48	4
170	12	Miller	2000	Canada	Vertical displacement of Ips latidens and Ips pini (Coleoptera: Scolytidae) by semiochemical interruption.	British Columbia	North-western North America	Ips pini	1986	(±)-ipsdienol	(±)-exo-brevicomin+ cis-and trans-verhenol	Hetro	Attraction to lure	Attraction to lure	8.56531	10.71	4	76.0171	75.8	4
171	12	Miller	2000	Canada	Vertical displacement of Ips latidens and Ips pini (Coleoptera: Scolytidae) by semiochemical interruption.	British Columbia	North-western North America	Ips pini	1986	(±)-ipsdienol	(±)-exo-brevicomin+ cis-and trans-verhenol	Hetro	Attraction to lure	Attraction to lure	8.56531	10.71	4	58.03	45.4	4
172	12	Miller	2000	Canada	Vertical displacement of Ips latidens and Ips pini (Coleoptera: Scolytidae) by semiochemical interruption.	British Columbia	North-western North America	Ips pini	1986	(±)-ipsdienol	(±)-exo-brevicomin+ cis-and trans-verhenol	Hetro	Attraction to lure	Attraction to lure	8.56531	10.71	4	32.7623	22.27	4
173	12	Miller	2000	Canada	Vertical displacement of Ips latidens and Ips pini (Coleoptera: Scolytidae) by semiochemical interruption.	British Columbia	North-western North America	Ips pini	1986	(±)-ipsdienol	(±)-exo-brevicomin+ cis-and trans-verhenol	Hetro	Attraction to lure	Attraction to lure	8.56531	10.71	4	21.6274	18.84	4
174	13	Zhang et al	2001	Sweden	Olfactory responses of Ips duplicatus from inner Mongolia, China to nonhost leaf and bark volatiles.	China	East Asia	Ips duplicatus	1998	(±)-Ipsdienol + (E)-Myrcenol	1-Hexanol	NHV	Attraction to lure	Attraction to lure	13	5.01	31	11.8	7.79	31
175	13	Zhang et al	2001	Sweden	Olfactory responses of Ips duplicatus from inner Mongolia, China to nonhost leaf and bark volatiles.	China	East Asia	Ips duplicatus	1998	(±)-Ipsdienol + (E)-Myrcenol	(Z)-3-hexen-1-ol	NHV	Attraction to lure	Attraction to lure	14.4	7.79	31	11.8	7.79	31
176	13	Zhang et al	2001	Sweden	Olfactory responses of Ips duplicatus from inner Mongolia, China to nonhost leaf and bark volatiles.	China	East Asia	Ips duplicatus	1998	(±)-Ipsdienol + (E)-Myrcenol	(E)-2-hexen-1-ol	NHV	Attraction to lure	Attraction to lure	12.3	4.45	31	11.8	7.79	31
177	13	Zhang et al	2001	Sweden	Olfactory responses of Ips duplicatus from inner Mongolia, China to nonhost leaf and bark volatiles.	China	East Asia	Ips duplicatus	1998	(±)-Ipsdienol + (E)-Myrcenol	1-Hexanal+(E)-2-Hexenal+(Z)-3-Hexenyl acetate	NHV	Attraction to lure	Attraction to lure	25.2	7.79	31	11.8	7.79	31
178	13	Zhang et al	2001	Sweden	Olfactory responses of Ips duplicatus from inner Mongolia, China to nonhost leaf and bark volatiles.	China	East Asia	Ips duplicatus	1998	(±)-Ipsdienol + (E)-Myrcenol	[(±)-Linalool+ (Z)-2-Hexen-1 ol+ (E)-3-Hexen-1-ol]	NHV	Attraction to lure	Attraction to lure	15.2	6.68	31	11.8	7.79	31
179	13	Zhang et al	2001	Sweden	Olfactory responses of Ips duplicatus from inner Mongolia, China to nonhost leaf and bark volatiles.	China	East Asia	Ips duplicatus	1998	(±)-Ipsdienol + (E)-Myrcenol	verbenone	Vb	Attraction to lure	Attraction to lure	7.3	4.45	31	11.8	7.79	31
180	13	Zhang et al	2001	Sweden	Olfactory responses of Ips duplicatus from inner Mongolia, China to nonhost leaf and bark volatiles.	China	East Asia	Ips duplicatus	1999	(±)-Ipsdienol + (E)-Myrcenol	1-Hexanol+(Z)-3 Hexen-1-ol+(E)-2-Hexen-1-ol	NHV	Attraction to lure	Attraction to lure	14.2	6.36	18	21.1	10.61	18
181	13	Zhang et al	2001	Sweden	Olfactory responses of Ips duplicatus from inner Mongolia, China to nonhost leaf and bark volatiles.	China	East Asia	Ips duplicatus	1999	(±)-Ipsdienol + (E)-Myrcenol	1-Hexanal+(E)-2-Hexenal+(Z)-3-Hexenyl acetate	NHV	Attraction to lure	Attraction to lure	21.1	11.88	18	21.1	10.61	18
182	13	Zhang et al	2001	Sweden	Olfactory responses of Ips duplicatus from inner Mongolia, China to nonhost leaf and bark volatiles.	China	East Asia	Ips duplicatus	1999	(±)-Ipsdienol + (E)-Myrcenol	[(±)-3-Octanol+(±)1-Octen-3-ol]	NHV	Attraction to lure	Attraction to lure	8.5	5.09	18	21.1	10.61	18
183	13	Zhang et al	2001	Sweden	Olfactory responses of Ips duplicatus from inner Mongolia, China to nonhost leaf and bark volatiles.	China	East Asia	Ips duplicatus	1999	(±)-Ipsdienol + (E)-Myrcenol	verbenone	Vb	Attraction to lure	Attraction to lure	7.7	4.67	18	21.1	10.61	18
184	13	Zhang et al	2001	Sweden	Olfactory responses of Ips duplicatus from inner Mongolia, China to nonhost leaf and bark volatiles.	China	East Asia	Ips duplicatus	1999	(±)-Ipsdienol + (E)-Myrcenol	Conophthorin	NHV	Attraction to lure	Attraction to lure	15.5	8.91	18	21.1	10.61	18
185	13	Zhang et al	2001	Sweden	Olfactory responses of Ips duplicatus from inner Mongolia, China to nonhost leaf and bark volatiles.	China	East Asia	Ips duplicatus	1999	(±)-Ipsdienol + (E)-Myrcenol	Conophthorin + verbenone	Vb+NHV	Attraction to lure	Attraction to lure	5.7	5.09	18	21.1	10.61	18
186	13	Zhang et al	2001	Sweden	Olfactory responses of Ips duplicatus from inner Mongolia, China to nonhost leaf and bark volatiles.	China	East Asia	Ips duplicatus	1999	(±)-Ipsdienol + (E)-Myrcenol	[1-Hexanol+(Z)-3 Hexen-1-ol+(E)-2-Hexen-1-ol]+ [(±)-3-Octanol+(±)1-Octen-3-ol]+(−)-verbenone	Vb+NHV	Attraction to lure	Attraction to lure	2.7	2.55	18	21.1	10.61	18
187	13	Zhang et al	2001	Sweden	Olfactory responses of Ips duplicatus from inner Mongolia, China to nonhost leaf and bark volatiles.	China	East Asia	Ips duplicatus	1999	(±)-Ipsdienol + (E)-Myrcenol	[1-Hexanol+(Z)-3 Hexen-1-ol+(E)-2-Hexen-1-ol]+ [(±)-3-Octanol+(±)1-Octen-3-ol]+(−)-verbenone+ (±)-trans-Conophthorin	Vb+NHV	Attraction to lure	Attraction to lure	3.2	2.97	18	21.1	10.61	18
188	14	Rappaport et al	2001	USA	Interruption of semiochemical-mediated attraction of Dendroctonus valens (coleoptera: scolytidae) and selected nontarget insects by verbenone.	California	South-western North America	Dendroctonus valens	2000	(-)-α-pinene, ( +)- β-pinene, and (+ )-3-carene	verbenone	Vb	Attraction to lure	Attraction to lure	0.1	2.09743	10	3.8	1.04871	10
189	14	Rappaport et al	2001	USA	Interruption of semiochemical-mediated attraction of Dendroctonus valens (coleoptera: scolytidae) and selected nontarget insects by verbenone.	California	South-western North America	Dendroctonus valens	2000	(-)-α-pinene, ( +)- β-pinene, and (+ )-3-carene	verbenone	Vb	Attraction to lure	Attraction to lure	0.4	0.677631	10	2.8	1.61341	10
190	14	Rappaport et al	2001	USA	Interruption of semiochemical-mediated attraction of Dendroctonus valens (coleoptera: scolytidae) and selected nontarget insects by verbenone.	California	South-western North America	Dendroctonus valens	2000	(-)-α-pinene, ( +)- β-pinene, and (+ )-3-carene	verbenone	Vb	Attraction to lure	Attraction to lure	0.3	0.645363	10	2.8	1.61341	10
191	15	Lindgren and Miller	2002	Canada	Effect of verbenone on five species of bark beetles (Coleoptera : Scolytidae) in lodgepole pine forests.	British Columbia	North-western North America	Dendroctonus ponderosae	1990	myrcene, exo-brevicomin, and trans-verbenol	verbenone	Vb	Attraction to lure	Attraction to lure	54.5148	58.18	10	73.2489	66.18	10
192	15	Lindgren and Miller	2002	Canada	Effect of verbenone on five species of bark beetles (Coleoptera : Scolytidae) in lodgepole pine forests.	British Columbia	North-western North America	Dendroctonus ponderosae	1990	myrcene, exo-brevicomin, and trans-verbenol	verbenone	Vb	Attraction to lure	Attraction to lure	157.975	180.93	10	73.2489	66.18	10
193	15	Lindgren and Miller	2002	Canada	Effect of verbenone on five species of bark beetles (Coleoptera : Scolytidae) in lodgepole pine forests.	British Columbia	North-western North America	Dendroctonus ponderosae	1990	myrcene, exo-brevicomin, and trans-verbenol	verbenone	Vb	Attraction to lure	Attraction to lure	4.72574	3.2	10	73.2489	66.18	10
194	15	Lindgren and Miller	2002	Canada	Effect of verbenone on five species of bark beetles (Coleoptera : Scolytidae) in lodgepole pine forests.	British Columbia	North-western North America	Dendroctonus ponderosae	1990	myrcene, exo-brevicomin, and trans-verbenol	verbenone	Vb	Attraction to lure	Attraction to lure	5.7384	6.4	10	73.2489	66.18	10
195	15	Lindgren and Miller	2002	Canada	Effect of verbenone on five species of bark beetles (Coleoptera : Scolytidae) in lodgepole pine forests.	British Columbia	North-western North America	Dendroctonus ponderosae	1990	myrcene, exo-brevicomin, and trans-verbenol	verbenone	Vb	Attraction to lure	Attraction to lure	8.10127	12.28	10	73.2489	66.18	10
196	16	Werner and Holsten	2002	USA	Use of semiochemicals of second bark beetles to disrupt spruce beetle attraction and survival in Alaska.	Alaska	North-western North America	Dendroctonus rufipennis	1991	(±)-frontalin + α-pinene	exo/endo-brevicomin	Hetro	Attraction to lure	Attraction to lure	55.8	68.6	5	141.8	223.8	5
197	16	Werner and Holsten	2002	USA	Use of semiochemicals of second bark beetles to disrupt spruce beetle attraction and survival in Alaska.	Alaska	North-western North America	Dendroctonus rufipennis	1991	(±)-frontalin + α-pinene	methyl butenol	Hetro	Attraction to lure	Attraction to lure	28.5	44.5	5	141.8	223.8	5
198	16	Werner and Holsten	2002	USA	Use of semiochemicals of second bark beetles to disrupt spruce beetle attraction and survival in Alaska.	Alaska	North-western North America	Dendroctonus rufipennis	1991	(±)-frontalin + α-pinene	ipsdienol	Hetro	Attraction to lure	Attraction to lure	94.2	150.6	5	141.8	223.8	5
199	16	Werner and Holsten	2002	USA	Use of semiochemicals of second bark beetles to disrupt spruce beetle attraction and survival in Alaska.	Alaska	North-western North America	Dendroctonus rufipennis	1991	(±)-frontalin + α-pinene	exo/endo-brevicomin + methyl butenol	Hetro	Attraction to lure	Attraction to lure	19.2	25	5	141.8	223.8	5
200	16	Werner and Holsten	2002	USA	Use of semiochemicals of second bark beetles to disrupt spruce beetle attraction and survival in Alaska.	Alaska	North-western North America	Dendroctonus rufipennis	1991	(±)-frontalin + α-pinene	exo/endo-brevicomin+ ipsdienol	Hetro	Attraction to lure	Attraction to lure	30.8	60.8	5	141.8	223.8	5
201	16	Werner and Holsten	2002	USA	Use of semiochemicals of second bark beetles to disrupt spruce beetle attraction and survival in Alaska.	Alaska	North-western North America	Dendroctonus rufipennis	1991	(±)-frontalin + α-pinene	methyl butenol+ipsdienol	Hetro	Attraction to lure	Attraction to lure	17.9	42.6	5	141.8	223.8	5
202	16	Werner and Holsten	2002	USA	Use of semiochemicals of second bark beetles to disrupt spruce beetle attraction and survival in Alaska.	Alaska	North-western North America	Dendroctonus rufipennis	1991	(±)-frontalin + α-pinene	exo/endo-brevicomin + methyl butenol+ ipsdienol	Hetro	Attraction to lure	Attraction to lure	47.3	75.2	5	141.8	223.8	5
203	16	Werner and Holsten	2002	USA	Use of semiochemicals of second bark beetles to disrupt spruce beetle attraction and survival in Alaska.	Alaska	North-western North America	Ips perturbatus	1991	(±)-frontalin + α-pinene + (±)-ipsdienol	exo/endo-brevicomin	Hetro	Attraction to lure	Attraction to lure	0.41	0.9	5	17.97	70.4	5
204	16	Werner and Holsten	2002	USA	Use of semiochemicals of second bark beetles to disrupt spruce beetle attraction and survival in Alaska.	Alaska	North-western North America	Ips perturbatus	1991	(±)-frontalin + α-pinene + (±)-ipsdienol	methyl butenol	Hetro	Attraction to lure	Attraction to lure	0.06	0.3	5	17.97	70.4	5
205	16	Werner and Holsten	2002	USA	Use of semiochemicals of second bark beetles to disrupt spruce beetle attraction and survival in Alaska.	Alaska	North-western North America	Ips perturbatus	1991	(±)-frontalin + α-pinene + (±)-ipsdienol	exo/endo-brevicomin + methyl butenol	Hetro	Attraction to lure	Attraction to lure	0.16	0.6	5	17.97	70.4	5
206	16	Werner and Holsten	2002	USA	Use of semiochemicals of second bark beetles to disrupt spruce beetle attraction and survival in Alaska.	Alaska	North-western North America	Ips perturbatus	1992	(±)-ipsdienol	exo/endo-brevicomin+frontalin + α-pinene	Hetro	Attraction to lure	Attraction to lure	0.41	0.9	5	0.25	0.5	5
207	16	Werner and Holsten	2002	USA	Use of semiochemicals of second bark beetles to disrupt spruce beetle attraction and survival in Alaska.	Alaska	North-western North America	Ips perturbatus	1993	(±)-ipsdienol	methyl butenol+frontalin + α-pinene	Hetro	Attraction to lure	Attraction to lure	0.06	0.3	5	0.25	0.5	5
208	16	Werner and Holsten	2002	USA	Use of semiochemicals of second bark beetles to disrupt spruce beetle attraction and survival in Alaska.	Alaska	North-western North America	Ips perturbatus	1994	(±)-ipsdienol	exo/endo-brevicomin+methyl butenol+frontalin + α-pinene+ frontalin + α-pinene	Hetro	Attraction to lure	Attraction to lure	0.16	0.6	5	0.25	0.5	5
209	16	Werner and Holsten	2002	USA	Use of semiochemicals of second bark beetles to disrupt spruce beetle attraction and survival in Alaska.	Alaska	North-western North America	Dendroctonus rufipennis	1992	(±)-frontalin + α-pinene	exo/endo-brevicomin	Hetro	Tree attack	Tree attack	0.36	0.1	5	0.47	0.2	5
210	16	Werner and Holsten	2002	USA	Use of semiochemicals of second bark beetles to disrupt spruce beetle attraction and survival in Alaska.	Alaska	North-western North America	Dendroctonus rufipennis	1992	(±)-frontalin + α-pinene	ipsdienol	Hetro	Tree attack	Tree attack	0.38	0.2	5	0.47	0.2	5
211	16	Werner and Holsten	2002	USA	Use of semiochemicals of second bark beetles to disrupt spruce beetle attraction and survival in Alaska.	Alaska	North-western North America	Dendroctonus rufipennis	1992	(±)-frontalin + α-pinene	exo/endo-brevicomin+ ipsdienol	Hetro	Tree attack	Tree attack	0.51	0.2	5	0.47	0.2	5
212	16	Werner and Holsten	2002	USA	Use of semiochemicals of second bark beetles to disrupt spruce beetle attraction and survival in Alaska.	Alaska	North-western North America	Dendroctonus rufipennis	1992	(±)-frontalin + α-pinene	MCH	Homo	Tree attack	Tree attack	0.38	0.3	5	0.47	0.2	5
213	16	Werner and Holsten	2002	USA	Use of semiochemicals of second bark beetles to disrupt spruce beetle attraction and survival in Alaska.	Alaska	North-western North America	Dendroctonus rufipennis	1992	(±)-frontalin + α-pinene	exo/endo-brevicomin + MCH	Homo+Hetro	Tree attack	Tree attack	0.06	0.1	5	0.47	0.2	5
214	16	Werner and Holsten	2002	USA	Use of semiochemicals of second bark beetles to disrupt spruce beetle attraction and survival in Alaska.	Alaska	North-western North America	Dendroctonus rufipennis	1992	(±)-frontalin + α-pinene	ipsdienol + MCH	Homo+Hetro	Tree attack	Tree attack	0.18	0.2	5	0.47	0.2	5
215	16	Werner and Holsten	2002	USA	Use of semiochemicals of second bark beetles to disrupt spruce beetle attraction and survival in Alaska.	Alaska	North-western North America	Dendroctonus rufipennis	1992	(±)-frontalin + α-pinene	exo/endo-brevicomin+ ipsdienol+MCH	Homo+Hetro	Tree attack	Tree attack	0.27	0.2	5	0.47	0.2	5
216	16	Werner and Holsten	2002	USA	Use of semiochemicals of second bark beetles to disrupt spruce beetle attraction and survival in Alaska.	Alaska	North-western North America	Dendroctonus rufipennis	1992	(±)-frontalin + α-pinene	exo/endo-brevicomin	Hetro	Tree colonization	Tree attack	1.73	0.6	5	1.71	0.6	5
217	16	Werner and Holsten	2002	USA	Use of semiochemicals of second bark beetles to disrupt spruce beetle attraction and survival in Alaska.	Alaska	North-western North America	Dendroctonus rufipennis	1992	(±)-frontalin + α-pinene	ipsdienol	Hetro	Tree colonization	Tree attack	1.42	0.4	5	1.71	0.6	5
218	16	Werner and Holsten	2002	USA	Use of semiochemicals of second bark beetles to disrupt spruce beetle attraction and survival in Alaska.	Alaska	North-western North America	Dendroctonus rufipennis	1992	(±)-frontalin + α-pinene	exo/endo-brevicomin+ ipsdienol	Hetro	Tree colonization	Tree attack	1.87	0.8	5	1.71	0.6	5
219	16	Werner and Holsten	2002	USA	Use of semiochemicals of second bark beetles to disrupt spruce beetle attraction and survival in Alaska.	Alaska	North-western North America	Dendroctonus rufipennis	1992	(±)-frontalin + α-pinene	MCH	Homo	Tree colonization	Tree attack	1.64	0.9	5	1.71	0.6	5
220	16	Werner and Holsten	2002	USA	Use of semiochemicals of second bark beetles to disrupt spruce beetle attraction and survival in Alaska.	Alaska	North-western North America	Dendroctonus rufipennis	1992	(±)-frontalin + α-pinene	exo/endo-brevicomin + MCH	Homo+Hetro	Tree colonization	Tree attack	1.06	0.4	5	1.71	0.6	5
221	16	Werner and Holsten	2002	USA	Use of semiochemicals of second bark beetles to disrupt spruce beetle attraction and survival in Alaska.	Alaska	North-western North America	Dendroctonus rufipennis	1992	(±)-frontalin + α-pinene	ipsdienol + MCH	Homo+Hetro	Tree colonization	Tree attack	1.02	0.3	5	1.71	0.6	5
222	16	Werner and Holsten	2002	USA	Use of semiochemicals of second bark beetles to disrupt spruce beetle attraction and survival in Alaska.	Alaska	North-western North America	Dendroctonus rufipennis	1992	(±)-frontalin + α-pinene	exo/endo-brevicomin+ ipsdienol+MCH	Homo+Hetro	Tree colonization	Tree attack	1.24	0.7	5	1.71	0.6	5
223	16	Werner and Holsten	2002	USA	Use of semiochemicals of second bark beetles to disrupt spruce beetle attraction and survival in Alaska.	Alaska	North-western North America	Dendroctonus rufipennis	1992	(±)-frontalin + α-pinene	exo/endo-brevicomin	Hetro	Tree colonization	Tree attack	12.62	6.1	5	10.49	3.9	5
224	16	Werner and Holsten	2002	USA	Use of semiochemicals of second bark beetles to disrupt spruce beetle attraction and survival in Alaska.	Alaska	North-western North America	Dendroctonus rufipennis	1992	(±)-frontalin + α-pinene	ipsdienol	Hetro	Tree colonization	Tree attack	9.66	5.4	5	10.49	3.9	5
225	16	Werner and Holsten	2002	USA	Use of semiochemicals of second bark beetles to disrupt spruce beetle attraction and survival in Alaska.	Alaska	North-western North America	Dendroctonus rufipennis	1992	(±)-frontalin + α-pinene	exo/endo-brevicomin+ ipsdienol	Hetro	Tree colonization	Tree attack	13.42	9.5	5	10.49	3.9	5
226	16	Werner and Holsten	2002	USA	Use of semiochemicals of second bark beetles to disrupt spruce beetle attraction and survival in Alaska.	Alaska	North-western North America	Dendroctonus rufipennis	1992	(±)-frontalin + α-pinene	MCH	Homo	Tree colonization	Tree attack	5.47	1.8	5	10.49	3.9	5
227	16	Werner and Holsten	2002	USA	Use of semiochemicals of second bark beetles to disrupt spruce beetle attraction and survival in Alaska.	Alaska	North-western North America	Dendroctonus rufipennis	1992	(±)-frontalin + α-pinene	exo/endo-brevicomin + MCH	Homo+Hetro	Tree colonization	Tree attack	10.03	13.5	5	10.49	3.9	5
228	16	Werner and Holsten	2002	USA	Use of semiochemicals of second bark beetles to disrupt spruce beetle attraction and survival in Alaska.	Alaska	North-western North America	Dendroctonus rufipennis	1992	(±)-frontalin + α-pinene	ipsdienol + MCH	Homo+Hetro	Tree colonization	Tree attack	5.27	2.4	5	10.49	3.9	5
229	16	Werner and Holsten	2002	USA	Use of semiochemicals of second bark beetles to disrupt spruce beetle attraction and survival in Alaska.	Alaska	North-western North America	Dendroctonus rufipennis	1992	(±)-frontalin + α-pinene	exo/endo-brevicomin+ ipsdienol+MCH	Homo+Hetro	Tree colonization	Tree attack	8.33	6.6	5	10.49	3.9	5
230	16	Werner and Holsten	2002	USA	Use of semiochemicals of second bark beetles to disrupt spruce beetle attraction and survival in Alaska.	Alaska	North-western North America	Dendroctonus rufipennis	1992	(±)-frontalin + α-pinene	exo/endo-brevicomin	Hetro	Tree attack	Tree attack	0.16	0.2	5	0.24	0.2	5
231	16	Werner and Holsten	2002	USA	Use of semiochemicals of second bark beetles to disrupt spruce beetle attraction and survival in Alaska.	Alaska	North-western North America	Dendroctonus rufipennis	1992	(±)-frontalin + α-pinene	ipsdienol	Hetro	Tree attack	Tree attack	0.26	0.2	5	0.24	0.2	5
232	16	Werner and Holsten	2002	USA	Use of semiochemicals of second bark beetles to disrupt spruce beetle attraction and survival in Alaska.	Alaska	North-western North America	Dendroctonus rufipennis	1992	(±)-frontalin + α-pinene	exo/endo-brevicomin+ ipsdienol	Hetro	Tree attack	Tree attack	0.18	0.3	5	0.24	0.2	5
233	16	Werner and Holsten	2002	USA	Use of semiochemicals of second bark beetles to disrupt spruce beetle attraction and survival in Alaska.	Alaska	North-western North America	Dendroctonus rufipennis	1992	(±)-frontalin + α-pinene	MCH	Homo	Tree attack	Tree attack	0.13	0.1	5	0.24	0.2	5
234	16	Werner and Holsten	2002	USA	Use of semiochemicals of second bark beetles to disrupt spruce beetle attraction and survival in Alaska.	Alaska	North-western North America	Dendroctonus rufipennis	1992	(±)-frontalin + α-pinene	exo/endo-brevicomin plus MCH	Homo+Hetro	Tree attack	Tree attack	0.24	0.2	5	0.24	0.2	5
235	16	Werner and Holsten	2002	USA	Use of semiochemicals of second bark beetles to disrupt spruce beetle attraction and survival in Alaska.	Alaska	North-western North America	Dendroctonus rufipennis	1992	(±)-frontalin + α-pinene	ipsdienol + MCH	Homo+Hetro	Tree attack	Tree attack	0.18	0.2	5	0.24	0.2	5
236	16	Werner and Holsten	2002	USA	Use of semiochemicals of second bark beetles to disrupt spruce beetle attraction and survival in Alaska.	Alaska	North-western North America	Dendroctonus rufipennis	1992	(±)-frontalin + α-pinene	exo/endo-brevicomin+ ipsdienol+MCH	Homo+Hetro	Tree attack	Tree attack	0.11	0.1	5	0.24	0.2	5
237	16	Werner and Holsten	2002	USA	Use of semiochemicals of second bark beetles to disrupt spruce beetle attraction and survival in Alaska.	Alaska	North-western North America	Dendroctonus rufipennis	1992	(±)-frontalin + α-pinene	exo/endo-brevicomin	Hetro	Tree colonization	Tree attack	2.16	0.9	5	1.53	0.5	5
238	16	Werner and Holsten	2002	USA	Use of semiochemicals of second bark beetles to disrupt spruce beetle attraction and survival in Alaska.	Alaska	North-western North America	Dendroctonus rufipennis	1992	(±)-frontalin + α-pinene	ipsdienol	Hetro	Tree colonization	Tree attack	1.69	1.2	5	1.53	0.5	5
239	16	Werner and Holsten	2002	USA	Use of semiochemicals of second bark beetles to disrupt spruce beetle attraction and survival in Alaska.	Alaska	North-western North America	Dendroctonus rufipennis	1992	(±)-frontalin + α-pinene	exo/endo-brevicomin+ ipsdienol	Hetro	Tree colonization	Tree attack	1.16	0.7	5	1.53	0.5	5
240	16	Werner and Holsten	2002	USA	Use of semiochemicals of second bark beetles to disrupt spruce beetle attraction and survival in Alaska.	Alaska	North-western North America	Dendroctonus rufipennis	1992	(±)-frontalin + α-pinene	MCH	Homo	Tree colonization	Tree attack	0.69	0.5	5	1.53	0.5	5
241	16	Werner and Holsten	2002	USA	Use of semiochemicals of second bark beetles to disrupt spruce beetle attraction and survival in Alaska.	Alaska	North-western North America	Dendroctonus rufipennis	1992	(±)-frontalin + α-pinene	exo/endo-brevicomin plus MCH	Homo+Hetro	Tree colonization	Tree attack	0.11	0.9	5	1.53	0.5	5
242	16	Werner and Holsten	2002	USA	Use of semiochemicals of second bark beetles to disrupt spruce beetle attraction and survival in Alaska.	Alaska	North-western North America	Dendroctonus rufipennis	1992	(±)-frontalin + α-pinene	ipsdienol + MCH	Homo+Hetro	Tree colonization	Tree attack	1.24	0.8	5	1.53	0.5	5
243	16	Werner and Holsten	2002	USA	Use of semiochemicals of second bark beetles to disrupt spruce beetle attraction and survival in Alaska.	Alaska	North-western North America	Dendroctonus rufipennis	1992	(±)-frontalin + α-pinene	exo/endo-brevicomin+ ipsdienol+MCH	Homo+Hetro	Tree colonization	Tree attack	0.56	0.5	5	1.53	0.5	5
244	16	Werner and Holsten	2002	USA	Use of semiochemicals of second bark beetles to disrupt spruce beetle attraction and survival in Alaska.	Alaska	North-western North America	Dendroctonus rufipennis	1992	(±)-frontalin + α-pinene	exo/endo-brevicomin	Hetro	Tree colonization	Tree attack	17.37	4.3	5	14.42	4.5	5
245	16	Werner and Holsten	2002	USA	Use of semiochemicals of second bark beetles to disrupt spruce beetle attraction and survival in Alaska.	Alaska	North-western North America	Dendroctonus rufipennis	1992	(±)-frontalin + α-pinene	ipsdienol	Hetro	Tree colonization	Tree attack	13.2	9.2	5	14.42	4.5	5
246	16	Werner and Holsten	2002	USA	Use of semiochemicals of second bark beetles to disrupt spruce beetle attraction and survival in Alaska.	Alaska	North-western North America	Dendroctonus rufipennis	1992	(±)-frontalin + α-pinene	exo/endo-brevicomin+ ipsdienol	Hetro	Tree colonization	Tree attack	9.45	9.4	5	14.42	4.5	5
247	16	Werner and Holsten	2002	USA	Use of semiochemicals of second bark beetles to disrupt spruce beetle attraction and survival in Alaska.	Alaska	North-western North America	Dendroctonus rufipennis	1992	(±)-frontalin + α-pinene	MCH	Homo	Tree colonization	Tree attack	4.49	3.3	5	14.42	4.5	5
248	16	Werner and Holsten	2002	USA	Use of semiochemicals of second bark beetles to disrupt spruce beetle attraction and survival in Alaska.	Alaska	North-western North America	Dendroctonus rufipennis	1992	(±)-frontalin + α-pinene	exo/endo-brevicomin plus MCH	Homo+Hetro	Tree colonization	Tree attack	5.96	4.2	5	14.42	4.5	5
249	16	Werner and Holsten	2002	USA	Use of semiochemicals of second bark beetles to disrupt spruce beetle attraction and survival in Alaska.	Alaska	North-western North America	Dendroctonus rufipennis	1992	(±)-frontalin + α-pinene	ipsdienol + MCH	Homo+Hetro	Tree colonization	Tree attack	11.22	8.8	5	14.42	4.5	5
250	16	Werner and Holsten	2002	USA	Use of semiochemicals of second bark beetles to disrupt spruce beetle attraction and survival in Alaska.	Alaska	North-western North America	Dendroctonus rufipennis	1992	(±)-frontalin + α-pinene	exo/endo-brevicomin+ ipsdienol+MCH	Homo+Hetro	Tree colonization	Tree attack	2.49	2.6	5	14.42	4.5	5
251	16	Werner and Holsten	2002	USA	Use of semiochemicals of second bark beetles to disrupt spruce beetle attraction and survival in Alaska.	Alaska	North-western North America	Dendroctonus rufipennis	1993	(±)-frontalin + α-pinene	exo/endo-brevicomin	Hetro	Tree attack	Tree attack	0.95	0.7	5	0.47	0.4	5
252	16	Werner and Holsten	2002	USA	Use of semiochemicals of second bark beetles to disrupt spruce beetle attraction and survival in Alaska.	Alaska	North-western North America	Dendroctonus rufipennis	1993	(±)-frontalin + α-pinene	ipsdienol	Hetro	Tree attack	Tree attack	0.09	0.2	5	0.47	0.4	5
253	16	Werner and Holsten	2002	USA	Use of semiochemicals of second bark beetles to disrupt spruce beetle attraction and survival in Alaska.	Alaska	North-western North America	Dendroctonus rufipennis	1993	(±)-frontalin + α-pinene	exo/endo-brevicomin+ ipsdienol	Hetro	Tree attack	Tree attack	0.44	0.5	5	0.47	0.4	5
254	16	Werner and Holsten	2002	USA	Use of semiochemicals of second bark beetles to disrupt spruce beetle attraction and survival in Alaska.	Alaska	North-western North America	Dendroctonus rufipennis	1993	(±)-frontalin + α-pinene	MCH	Homo	Tree attack	Tree attack	0.22	0.4	5	0.47	0.4	5
255	16	Werner and Holsten	2002	USA	Use of semiochemicals of second bark beetles to disrupt spruce beetle attraction and survival in Alaska.	Alaska	North-western North America	Dendroctonus rufipennis	1993	(±)-frontalin + α-pinene	exo/endo-brevicomin plus MCH	Homo+Hetro	Tree attack	Tree attack	0.07	0.2	5	0.47	0.4	5
256	16	Werner and Holsten	2002	USA	Use of semiochemicals of second bark beetles to disrupt spruce beetle attraction and survival in Alaska.	Alaska	North-western North America	Dendroctonus rufipennis	1993	(±)-frontalin + α-pinene	ipsdienol + MCH	Homo+Hetro	Tree attack	Tree attack	0.11	0.2	5	0.47	0.4	5
257	16	Werner and Holsten	2002	USA	Use of semiochemicals of second bark beetles to disrupt spruce beetle attraction and survival in Alaska.	Alaska	North-western North America	Dendroctonus rufipennis	1993	(±)-frontalin + α-pinene	exo/endo-brevicomin+ ipsdienol+MCH	Homo+Hetro	Tree attack	Tree attack	0.13	0.3	5	0.47	0.4	5
258	16	Werner and Holsten	2002	USA	Use of semiochemicals of second bark beetles to disrupt spruce beetle attraction and survival in Alaska.	Alaska	North-western North America	Dendroctonus rufipennis	1993	(±)-frontalin + α-pinene	exo/endo-brevicomin	Hetro	Tree colonization	Tree attack	1.82	0.7	5	0.95	0.5	5
259	16	Werner and Holsten	2002	USA	Use of semiochemicals of second bark beetles to disrupt spruce beetle attraction and survival in Alaska.	Alaska	North-western North America	Dendroctonus rufipennis	1993	(±)-frontalin + α-pinene	ipsdienol	Hetro	Tree colonization	Tree attack	0.36	0.4	5	0.95	0.5	5
260	16	Werner and Holsten	2002	USA	Use of semiochemicals of second bark beetles to disrupt spruce beetle attraction and survival in Alaska.	Alaska	North-western North America	Dendroctonus rufipennis	1993	(±)-frontalin + α-pinene	exo/endo-brevicomin+ ipsdienol	Hetro	Tree colonization	Tree attack	1.05	0.6	5	0.95	0.5	5
261	16	Werner and Holsten	2002	USA	Use of semiochemicals of second bark beetles to disrupt spruce beetle attraction and survival in Alaska.	Alaska	North-western North America	Dendroctonus rufipennis	1993	(±)-frontalin + α-pinene	MCH	Homo	Tree colonization	Tree attack	0.6	0.7	5	0.95	0.5	5
262	16	Werner and Holsten	2002	USA	Use of semiochemicals of second bark beetles to disrupt spruce beetle attraction and survival in Alaska.	Alaska	North-western North America	Dendroctonus rufipennis	1993	(±)-frontalin + α-pinene	exo/endo-brevicomin plus MCH	Homo+Hetro	Tree colonization	Tree attack	0.35	0.4	5	0.95	0.5	5
263	16	Werner and Holsten	2002	USA	Use of semiochemicals of second bark beetles to disrupt spruce beetle attraction and survival in Alaska.	Alaska	North-western North America	Dendroctonus rufipennis	1993	(±)-frontalin + α-pinene	ipsdienol + MCH	Homo+Hetro	Tree colonization	Tree attack	0.35	0.5	5	0.95	0.5	5
264	16	Werner and Holsten	2002	USA	Use of semiochemicals of second bark beetles to disrupt spruce beetle attraction and survival in Alaska.	Alaska	North-western North America	Dendroctonus rufipennis	1993	(±)-frontalin + α-pinene	exo/endo-brevicomin+ ipsdienol+MCH	Homo+Hetro	Tree colonization	Tree attack	0.22	0.3	5	0.95	0.5	5
265	16	Werner and Holsten	2002	USA	Use of semiochemicals of second bark beetles to disrupt spruce beetle attraction and survival in Alaska.	Alaska	North-western North America	Dendroctonus rufipennis	1993	(±)-frontalin + α-pinene	exo/endo-brevicomin	Hetro	Tree colonization	Tree attack	25.9	14.1	5	15.67	4.7	5
266	16	Werner and Holsten	2002	USA	Use of semiochemicals of second bark beetles to disrupt spruce beetle attraction and survival in Alaska.	Alaska	North-western North America	Dendroctonus rufipennis	1993	(±)-frontalin + α-pinene	ipsdienol	Hetro	Tree colonization	Tree attack	13.27	7.9	5	15.67	4.7	5
267	16	Werner and Holsten	2002	USA	Use of semiochemicals of second bark beetles to disrupt spruce beetle attraction and survival in Alaska.	Alaska	North-western North America	Dendroctonus rufipennis	1993	(±)-frontalin + α-pinene	exo/endo-brevicomin+ ipsdienol	Hetro	Tree colonization	Tree attack	16.84	8.4	5	15.67	4.7	5
268	16	Werner and Holsten	2002	USA	Use of semiochemicals of second bark beetles to disrupt spruce beetle attraction and survival in Alaska.	Alaska	North-western North America	Dendroctonus rufipennis	1993	(±)-frontalin + α-pinene	MCH	Homo	Tree colonization	Tree attack	6.29	5.8	5	15.67	4.7	5
269	16	Werner and Holsten	2002	USA	Use of semiochemicals of second bark beetles to disrupt spruce beetle attraction and survival in Alaska.	Alaska	North-western North America	Dendroctonus rufipennis	1993	(±)-frontalin + α-pinene	exo/endo-brevicomin plus MCH	Homo+Hetro	Tree colonization	Tree attack	7.4	7.6	5	15.67	4.7	5
270	16	Werner and Holsten	2002	USA	Use of semiochemicals of second bark beetles to disrupt spruce beetle attraction and survival in Alaska.	Alaska	North-western North America	Dendroctonus rufipennis	1993	(±)-frontalin + α-pinene	ipsdienol + MCH	Homo+Hetro	Tree colonization	Tree attack	6.67	7.7	5	15.67	4.7	5
271	16	Werner and Holsten	2002	USA	Use of semiochemicals of second bark beetles to disrupt spruce beetle attraction and survival in Alaska.	Alaska	North-western North America	Dendroctonus rufipennis	1993	(±)-frontalin + α-pinene	exo/endo-brevicomin+ ipsdienol+MCH	Homo+Hetro	Tree colonization	Tree attack	2.98	4.4	5	15.67	4.7	5
272	17	Zhang and Schlyter	2003	USA	Redundancy, synergism, and active inhibitory range of non-host volatiles in reducing pheromone attraction in European spruce bark beetle Ips typographus.	Sweden	Scandinavia	Ips typographus	1999	cis-verbenol + 2-methyl-3-buten-2-ol	trans-conophthorin	NHV	Attraction to lure	Attraction to lure	13.1304	5.12	13	29.1451	7.92	13
273	17	Zhang and Schlyter	2003	USA	Redundancy, synergism, and active inhibitory range of non-host volatiles in reducing pheromone attraction in European spruce bark beetle Ips typographus.	Sweden	Scandinavia	Ips typographus	1999	cis-verbenol + 2-methyl-3-buten-2-ol	verbenone	Vb	Attraction to lure	Attraction to lure	9.7294	4.81	13	29.1451	7.92	13
274	17	Zhang and Schlyter	2003	USA	Redundancy, synergism, and active inhibitory range of non-host volatiles in reducing pheromone attraction in European spruce bark beetle Ips typographus.	Sweden	Scandinavia	Ips typographus	1999	cis-verbenol + 2-methyl-3-buten-2-ol	verbenone+trans-conophthorin	Vb+NHV	Attraction to lure	Attraction to lure	5.33825	2.95	13	29.1451	7.92	13
275	17	Zhang and Schlyter	2003	USA	Redundancy, synergism, and active inhibitory range of non-host volatiles in reducing pheromone attraction in European spruce bark beetle Ips typographus.	Sweden	Scandinavia	Ips typographus	1999	cis-verbenol + 2-methyl-3-buten-2-ol	verbenone+trans-conophthorin	Vb+NHV	Attraction to lure	Attraction to lure	5.68266	3.26	13	29.1451	7.92	13
276	17	Zhang and Schlyter	2003	USA	Redundancy, synergism, and active inhibitory range of non-host volatiles in reducing pheromone attraction in European spruce bark beetle Ips typographus.	Sweden	Scandinavia	Ips typographus	1999	cis-verbenol + 2-methyl-3-buten-2-ol	verbenone+trans-conophthorin	Vb+NHV	Attraction to lure	Attraction to lure	4.13284	2.64	13	29.1451	7.92	13
277	17	Zhang and Schlyter	2003	USA	Redundancy, synergism, and active inhibitory range of non-host volatiles in reducing pheromone attraction in European spruce bark beetle Ips typographus.	Sweden	Scandinavia	Ips typographus	1999	cis-verbenol + 2-methyl-3-buten-2-ol	verbenone+trans-conophthorin	Vb+NHV	Attraction to lure	Attraction to lure	2.79828	1.71	13	29.1451	7.92	13
278	17	Zhang and Schlyter	2003	USA	Redundancy, synergism, and active inhibitory range of non-host volatiles in reducing pheromone attraction in European spruce bark beetle Ips typographus.	Sweden	Scandinavia	Ips typographus	1999	cis-verbenol + 2-methyl-3-buten-2-ol	verbenone+trans-conophthorin	Vb+NHV	Attraction to lure	Attraction to lure	3.18573	2.64	13	29.1451	7.92	13
279	17	Zhang and Schlyter	2003	USA	Redundancy, synergism, and active inhibitory range of non-host volatiles in reducing pheromone attraction in European spruce bark beetle Ips typographus.	Sweden	Scandinavia	Ips typographus	1999	cis-verbenol + 2-methyl-3-buten-2-ol	verbenone+trans-conophthorin	Vb+NHV	Attraction to lure	Attraction to lure	4.5203	3.26	13	29.1451	7.92	13
280	17	Zhang and Schlyter	2003	USA	Redundancy, synergism, and active inhibitory range of non-host volatiles in reducing pheromone attraction in European spruce bark beetle Ips typographus.	Sweden	Scandinavia	Ips typographus	1999	cis-verbenol + 2-methyl-3-buten-2-ol	verbenone+trans-conophthorin	Vb+NHV	Attraction to lure	Attraction to lure	14.7663	8.54	13	29.1451	7.92	13
281	17	Zhang and Schlyter	2003	USA	Redundancy, synergism, and active inhibitory range of non-host volatiles in reducing pheromone attraction in European spruce bark beetle Ips typographus.	Sweden	Scandinavia	Ips typographus	1999	cis-verbenol + 2-methyl-3-buten-2-ol	verbenone+trans-conophthorin	Vb+NHV	Attraction to lure	Attraction to lure	7.10332	4.04	13	29.1451	7.92	13
282	17	Zhang and Schlyter	2003	USA	Redundancy, synergism, and active inhibitory range of non-host volatiles in reducing pheromone attraction in European spruce bark beetle Ips typographus.	Sweden	Scandinavia	Ips typographus	2000	cis-verbenol + 2-methyl-3-buten-2-ol	1-hexanol	NHV	Attraction to lure	Attraction to lure	6.08032	3.07	14	21.4084	6.24	14
283	17	Zhang and Schlyter	2003	USA	Redundancy, synergism, and active inhibitory range of non-host volatiles in reducing pheromone attraction in European spruce bark beetle Ips typographus.	Sweden	Scandinavia	Ips typographus	2000	cis-verbenol + 2-methyl-3-buten-2-ol	(Z)-3-hexen-1-ol	NHV	Attraction to lure	Attraction to lure	6.67421	4.02	14	21.4084	6.24	14
284	17	Zhang and Schlyter	2003	USA	Redundancy, synergism, and active inhibitory range of non-host volatiles in reducing pheromone attraction in European spruce bark beetle Ips typographus.	Sweden	Scandinavia	Ips typographus	2000	cis-verbenol + 2-methyl-3-buten-2-ol	(E)-2-hexen-1-ol	NHV	Attraction to lure	Attraction to lure	6.50452	3.6	14	21.4084	6.24	14
285	17	Zhang and Schlyter	2003	USA	Redundancy, synergism, and active inhibitory range of non-host volatiles in reducing pheromone attraction in European spruce bark beetle Ips typographus.	Sweden	Scandinavia	Ips typographus	2000	cis-verbenol + 2-methyl-3-buten-2-ol	1-hexanol+(Z)-3-hexen-1-ol	NHV	Attraction to lure	Attraction to lure	5.57127	4.55	14	21.4084	6.24	14
286	17	Zhang and Schlyter	2003	USA	Redundancy, synergism, and active inhibitory range of non-host volatiles in reducing pheromone attraction in European spruce bark beetle Ips typographus.	Sweden	Scandinavia	Ips typographus	2000	cis-verbenol + 2-methyl-3-buten-2-ol	1-hexanol+ (E)-2-hexen-1-ol	NHV	Attraction to lure	Attraction to lure	7.18326	3.39	14	21.4084	6.24	14
287	17	Zhang and Schlyter	2003	USA	Redundancy, synergism, and active inhibitory range of non-host volatiles in reducing pheromone attraction in European spruce bark beetle Ips typographus.	Sweden	Scandinavia	Ips typographus	2000	cis-verbenol + 2-methyl-3-buten-2-ol	(Z)-3-hexen-1-ol + (E)-2-hexen-1-ol	NHV	Attraction to lure	Attraction to lure	6.92873	2.86	14	21.4084	6.24	14
288	17	Zhang and Schlyter	2003	USA	Redundancy, synergism, and active inhibitory range of non-host volatiles in reducing pheromone attraction in European spruce bark beetle Ips typographus.	Sweden	Scandinavia	Ips typographus	2000	cis-verbenol + 2-methyl-3-buten-2-ol	1-hexanol+(Z)-3-hexen-1-ol + (E)-2-hexen-1-ol	NHV	Attraction to lure	Attraction to lure	7.38122	3.49	14	21.4084	6.24	14
289	17	Zhang and Schlyter	2003	USA	Redundancy, synergism, and active inhibitory range of non-host volatiles in reducing pheromone attraction in European spruce bark beetle Ips typographus.	Sweden	Scandinavia	Ips typographus	2000	cis-verbenol + 2-methyl-3-buten-2-ol	3-octanol	NHV	Attraction to lure	Attraction to lure	9.55882	3.7	14	21.4084	6.24	14
290	17	Zhang and Schlyter	2003	USA	Redundancy, synergism, and active inhibitory range of non-host volatiles in reducing pheromone attraction in European spruce bark beetle Ips typographus.	Sweden	Scandinavia	Ips typographus	2000	cis-verbenol + 2-methyl-3-buten-2-ol	1-octen-3-ol	NHV	Attraction to lure	Attraction to lure	7.77715	4.02	14	21.4084	6.24	14
291	17	Zhang and Schlyter	2003	USA	Redundancy, synergism, and active inhibitory range of non-host volatiles in reducing pheromone attraction in European spruce bark beetle Ips typographus.	Sweden	Scandinavia	Ips typographus	2000	cis-verbenol + 2-methyl-3-buten-2-ol	3-octanol + 1-octen-3-ol	NHV	Attraction to lure	Attraction to lure	6.78733	4.34	14	21.4084	6.24	14
292	17	Zhang and Schlyter	2003	USA	Redundancy, synergism, and active inhibitory range of non-host volatiles in reducing pheromone attraction in European spruce bark beetle Ips typographus.	Sweden	Scandinavia	Ips typographus	2000	cis-verbenol + 2-methyl-3-buten-2-ol	1-hexanol+(Z)-3-hexen-1-ol + (E)-2-hexen-1-ol +3-octanol + 1-octen-3-ol	NHV	Attraction to lure	Attraction to lure	6.08032	4.55	14	21.4084	6.24	14
293	17	Zhang and Schlyter	2003	USA	Redundancy, synergism, and active inhibitory range of non-host volatiles in reducing pheromone attraction in European spruce bark beetle Ips typographus.	Sweden	Scandinavia	Ips typographus	2000	cis-verbenol + 2-methyl-3-buten-2-ol	verbenone+1-hexanol+(Z)-3-hexen-1-ol + (E)-2-hexen-1-ol +3-octanol + 1-octen-3-ol	Vb+NHV	Attraction to lure	Attraction to lure	2.00792	1.27	14	21.4084	6.24	14
294	17	Zhang and Schlyter	2003	USA	Redundancy, synergism, and active inhibitory range of non-host volatiles in reducing pheromone attraction in European spruce bark beetle Ips typographus.	Sweden	Scandinavia	Ips typographus	2000	cis-verbenol + 2-methyl-3-buten-2-ol	1-hexanol+(Z)-3-hexen-1-ol + (E)-2-hexen-1-ol	NHV	Attraction to lure	Attraction to lure	19.5092	10.4	13	40.2454	13.05	13
295	17	Zhang and Schlyter	2003	USA	Redundancy, synergism, and active inhibitory range of non-host volatiles in reducing pheromone attraction in European spruce bark beetle Ips typographus.	Sweden	Scandinavia	Ips typographus	2000	cis-verbenol + 2-methyl-3-buten-2-ol	3-octanol + 1-octen-3-ol	NHV	Attraction to lure	Attraction to lure	14.5399	5.75	13	40.2454	13.05	13
296	17	Zhang and Schlyter	2003	USA	Redundancy, synergism, and active inhibitory range of non-host volatiles in reducing pheromone attraction in European spruce bark beetle Ips typographus.	Sweden	Scandinavia	Ips typographus	2000	cis-verbenol + 2-methyl-3-buten-2-ol	trans-conophthorin	NHV	Attraction to lure	Attraction to lure	12.0245	4.65	13	40.2454	13.05	13
297	17	Zhang and Schlyter	2003	USA	Redundancy, synergism, and active inhibitory range of non-host volatiles in reducing pheromone attraction in European spruce bark beetle Ips typographus.	Sweden	Scandinavia	Ips typographus	2000	cis-verbenol + 2-methyl-3-buten-2-ol	trans-conophthorin+1-hexanol+(Z)-3-hexen-1-ol + (E)-2-hexen-1-ol	NHV	Attraction to lure	Attraction to lure	5.88957	3.32	13	40.2454	13.05	13
298	17	Zhang and Schlyter	2003	USA	Redundancy, synergism, and active inhibitory range of non-host volatiles in reducing pheromone attraction in European spruce bark beetle Ips typographus.	Sweden	Scandinavia	Ips typographus	2000	cis-verbenol + 2-methyl-3-buten-2-ol	trans-conophthorin+3-octanol + 1-octen-3-ol	NHV	Attraction to lure	Attraction to lure	4.84663	2.43	13	40.2454	13.05	13
299	17	Zhang and Schlyter	2003	USA	Redundancy, synergism, and active inhibitory range of non-host volatiles in reducing pheromone attraction in European spruce bark beetle Ips typographus.	Sweden	Scandinavia	Ips typographus	2000	cis-verbenol + 2-methyl-3-buten-2-ol	trans-conophthorin+1-hexanol+(Z)-3-hexen-1-ol + (E)-2-hexen-1-ol+3-octanol + 1-octen-3-ol	NHV	Attraction to lure	Attraction to lure	4.47853	2.65	13	40.2454	13.05	13
300	17	Zhang and Schlyter	2003	USA	Redundancy, synergism, and active inhibitory range of non-host volatiles in reducing pheromone attraction in European spruce bark beetle Ips typographus.	Sweden	Scandinavia	Ips typographus	2000	cis-verbenol + 2-methyl-3-buten-2-ol	trans-conophthorin+1-hexanol+(Z)-3-hexen-1-ol + (E)-2-hexen-1-ol+3-octanol + 1-octen-3-ol	NHV	Attraction to lure	Attraction to lure	1.43791	1.81	6	7.45098	5.34	6
301	17	Zhang and Schlyter	2003	USA	Redundancy, synergism, and active inhibitory range of non-host volatiles in reducing pheromone attraction in European spruce bark beetle Ips typographus.	Sweden	Scandinavia	Ips typographus	2000	cis-verbenol + 2-methyl-3-buten-2-ol	trans-conophthorin+1-hexanol+(Z)-3-hexen-1-ol + (E)-2-hexen-1-ol+3-octanol + 1-octen-3-ol	NHV	Attraction to lure	Attraction to lure	1.56863	1.92	6	3.66013	2.35	6
302	17	Zhang and Schlyter	2003	USA	Redundancy, synergism, and active inhibitory range of non-host volatiles in reducing pheromone attraction in European spruce bark beetle Ips typographus.	Sweden	Scandinavia	Ips typographus	2000	cis-verbenol + 2-methyl-3-buten-2-ol	trans-conophthorin+1-hexanol+(Z)-3-hexen-1-ol + (E)-2-hexen-1-ol+3-octanol + 1-octen-3-ol	NHV	Attraction to lure	Attraction to lure	0.566449	1.07	6	1.30719	1.07	6
303	18	Miller and Borden	2003	Canada	Responses of Ips pini (Say), Pityogenes knechteli Swaine and associated beetles (Coleoptera) to host monoterpenes in stands of lodgepole Pine.	British Columbia	North-western North America	Ips pini	1989	Ipsdienol	3-carene	Host Repellent	Attraction to lure	Attraction to lure	160.954	108.83	4	113.074	108.83	4
304	18	Miller and Borden	2003	Canada	Responses of Ips pini (Say), Pityogenes knechteli Swaine and associated beetles (Coleoptera) to host monoterpenes in stands of lodgepole Pine.	British Columbia	North-western North America	Ips pini	1989	Ipsdienol	β-pienen	Host Repellent	Attraction to lure	Attraction to lure	90.4704	48.67	4	76.3571	51.75	4
305	18	Miller and Borden	2003	Canada	Responses of Ips pini (Say), Pityogenes knechteli Swaine and associated beetles (Coleoptera) to host monoterpenes in stands of lodgepole Pine.	British Columbia	North-western North America	Ips pini	1989	Ipsdienol	γ-terpinene	Host Repellent	Attraction to lure	Attraction to lure	59.5593	18.46	4	59.4997	32.04	4
306	18	Miller and Borden	2003	Canada	Responses of Ips pini (Say), Pityogenes knechteli Swaine and associated beetles (Coleoptera) to host monoterpenes in stands of lodgepole Pine.	British Columbia	North-western North America	Ips pini	1989	Ipsdienol	a-pinene	Host Repellent	Attraction to lure	Attraction to lure	62.7666	33.88	4	74.7177	52.89	4
307	18	Miller and Borden	2003	Canada	Responses of Ips pini (Say), Pityogenes knechteli Swaine and associated beetles (Coleoptera) to host monoterpenes in stands of lodgepole Pine.	British Columbia	North-western North America	Ips pini	1989	Ipsdienol	Terpinolene	Host Repellent	Attraction to lure	Attraction to lure	19.3431	7.12	4	50.4562	20.07	4
308	18	Miller and Borden	2003	Canada	Responses of Ips pini (Say), Pityogenes knechteli Swaine and associated beetles (Coleoptera) to host monoterpenes in stands of lodgepole Pine.	British Columbia	North-western North America	Dendroctonus ponderosae	1989	Ipsdienol	γ-terpinene + ipsdienol	Host Repellent	Attraction to lure	Attraction to lure	8.98012	7.83	4	5.97819	5.08	4
309	19	Pureswaran and Borden	2004	Canada	New repellent semiochemicals for three species of Dendroctonus (Coleoptera : Scolytidae).	British Columbia	North-western North America	Dendroctonus pseudotsugae	2001	ethanol+ (±)-frontalin + (±)-MCOL	1-octen-3-ol	Homo	Female attraction to lure	Female attraction to lure	7.83069	10.11	13	24.5503	33	13
310	19	Pureswaran and Borden	2004	Canada	New repellent semiochemicals for three species of Dendroctonus (Coleoptera : Scolytidae).	British Columbia	North-western North America	Dendroctonus pseudotsugae	2001	ethanol+ (±)-frontalin + (±)-MCOL	1-octen-3-ol	Homo	Male attraction to lure	Male attraction to lure	9.68254	12.21	13	31.4286	45.78	13
311	19	Pureswaran and Borden	2004	Canada	New repellent semiochemicals for three species of Dendroctonus (Coleoptera : Scolytidae).	British Columbia	North-western North America	Dendroctonus pseudotsugae	2001	ethanol+ (±)-frontalin + (±)-MCOL	1-octen-3-ol	Homo	Female attraction to lure	Female attraction to lure	7.61	13.83	15	28.55	39.6	15
312	19	Pureswaran and Borden	2004	Canada	New repellent semiochemicals for three species of Dendroctonus (Coleoptera : Scolytidae).	British Columbia	North-western North America	Dendroctonus pseudotsugae	2001	ethanol+ (±)-frontalin + (±)-MCOL	1-octen-3-ol	Homo	Male attraction to lure	Male attraction to lure	7.54155	14	15	28.5769	42.48	15
313	19	Pureswaran and Borden	2004	Canada	New repellent semiochemicals for three species of Dendroctonus (Coleoptera : Scolytidae).	British Columbia	North-western North America	Dendroctonus pseudotsugae	2001	ethanol+ (±)-frontalin + (±)-MCOL	verbenone	Vb	Female attraction to lure	Female attraction to lure	71.2963	46.62	15	79.0123	65.75	15
314	19	Pureswaran and Borden	2004	Canada	New repellent semiochemicals for three species of Dendroctonus (Coleoptera : Scolytidae).	British Columbia	North-western North America	Dendroctonus pseudotsugae	2001	ethanol+ (±)-frontalin + (±)-MCOL	endo-brevicomin	Hetro	Female attraction to lure	Female attraction to lure	50.9259	23.91	15	79.0123	65.75	15
315	19	Pureswaran and Borden	2004	Canada	New repellent semiochemicals for three species of Dendroctonus (Coleoptera : Scolytidae).	British Columbia	North-western North America	Dendroctonus pseudotsugae	2001	ethanol+ (±)-frontalin + (±)-MCOL	exo-brevicomin	Hetro	Female attraction to lure	Female attraction to lure	44.7531	29.88	15	79.0123	65.75	15
316	19	Pureswaran and Borden	2004	Canada	New repellent semiochemicals for three species of Dendroctonus (Coleoptera : Scolytidae).	British Columbia	North-western North America	Dendroctonus pseudotsugae	2001	ethanol+ (±)-frontalin + (±)-MCOL	acetophenone	Homo	Female attraction to lure	Female attraction to lure	31.7901	23.91	15	79.0123	65.75	15
317	19	Pureswaran and Borden	2004	Canada	New repellent semiochemicals for three species of Dendroctonus (Coleoptera : Scolytidae).	British Columbia	North-western North America	Dendroctonus pseudotsugae	2001	ethanol+ (±)-frontalin + (±)-MCOL	trans-verbenol	Hetro	Female attraction to lure	Female attraction to lure	19.7531	15.54	15	79.0123	65.75	15
318	19	Pureswaran and Borden	2004	Canada	New repellent semiochemicals for three species of Dendroctonus (Coleoptera : Scolytidae).	British Columbia	North-western North America	Dendroctonus pseudotsugae	2001	ethanol+ (±)-frontalin + (±)-MCOL	verbenone	Hetro	Male attraction to lure	Male attraction to lure	173.231	109.64	15	176.615	143	15
319	19	Pureswaran and Borden	2004	Canada	New repellent semiochemicals for three species of Dendroctonus (Coleoptera : Scolytidae).	British Columbia	North-western North America	Dendroctonus pseudotsugae	2001	ethanol+ (±)-frontalin + (±)-MCOL	endo-brevicomin	Hetro	Male attraction to lure	Male attraction to lure	174.154	119.17	15	176.615	143	15
320	19	Pureswaran and Borden	2004	Canada	New repellent semiochemicals for three species of Dendroctonus (Coleoptera : Scolytidae).	British Columbia	North-western North America	Dendroctonus pseudotsugae	2001	ethanol+ (±)-frontalin + (±)-MCOL	exo-brevicomin	Hetro	Male attraction to lure	Male attraction to lure	128	94.14	15	176.615	143	15
321	19	Pureswaran and Borden	2004	Canada	New repellent semiochemicals for three species of Dendroctonus (Coleoptera : Scolytidae).	British Columbia	North-western North America	Dendroctonus pseudotsugae	2001	ethanol+ (±)-frontalin + (±)-MCOL	acetophenone	Homo	Male attraction to lure	Male attraction to lure	98.1538	100.1	15	176.615	143	15
322	19	Pureswaran and Borden	2004	Canada	New repellent semiochemicals for three species of Dendroctonus (Coleoptera : Scolytidae).	British Columbia	North-western North America	Dendroctonus pseudotsugae	2001	ethanol+ (±)-frontalin + (±)-MCOL	trans-verbenol	Hetro	Male attraction to lure	Male attraction to lure	74.7692	65.54	15	176.615	143	15
323	19	Pureswaran and Borden	2004	Canada	New repellent semiochemicals for three species of Dendroctonus (Coleoptera : Scolytidae).	British Columbia	North-western North America	Dendroctonus ponderosae	2001	myrcene+(±)-exo-brevicomin+ (−)-trans-verbenol	1-octen-3-ol	Homo	Female attraction to lure	Female attraction to lure	20.6845	27.09	15	86.6071	88.76	15
324	19	Pureswaran and Borden	2004	Canada	New repellent semiochemicals for three species of Dendroctonus (Coleoptera : Scolytidae).	British Columbia	North-western North America	Dendroctonus ponderosae	2001	myrcene+(±)-exo-brevicomin+ (−)-trans-verbenol	1-octen-3-ol	Homo	Male attraction to lure	Male attraction to lure	37.0904	34.04	15	98.4608	79.61	15
325	19	Pureswaran and Borden	2004	Canada	New repellent semiochemicals for three species of Dendroctonus (Coleoptera : Scolytidae).	British Columbia	North-western North America	Dendroctonus ponderosae	2001	myrcene+(±)-exo-brevicomin+ (−)-trans-verbenol	MCOL	Hetro	Female attraction to lure	Female attraction to lure	53.5714	113.95	15	72.9592	154.13	15
326	19	Pureswaran and Borden	2004	Canada	New repellent semiochemicals for three species of Dendroctonus (Coleoptera : Scolytidae).	British Columbia	North-western North America	Dendroctonus ponderosae	2001	myrcene+(±)-exo-brevicomin+ (−)-trans-verbenol	MCOL	Hetro	Male attraction to lure	Male attraction to lure	33.4655	69.74	15	66.2514	142.77	15
327	19	Pureswaran and Borden	2004	Canada	New repellent semiochemicals for three species of Dendroctonus (Coleoptera : Scolytidae).	British Columbia	North-western North America	Dendroctonus ponderosae	2001	myrcene+(±)-exo-brevicomin+ (−)-trans-verbenol	MCH	Hetro	Female attraction to lure	Female attraction to lure	7.22603	10.74	15	18.0137	22.28	15
328	19	Pureswaran and Borden	2004	Canada	New repellent semiochemicals for three species of Dendroctonus (Coleoptera : Scolytidae).	British Columbia	North-western North America	Dendroctonus ponderosae	2001	myrcene+(±)-exo-brevicomin+ (−)-trans-verbenol	MCH	Hetro	Male attraction to lure	Male attraction to lure	9.23341	11.3	15	16.0641	16.09	15
329	19	Pureswaran and Borden	2004	Canada	New repellent semiochemicals for three species of Dendroctonus (Coleoptera : Scolytidae).	British Columbia	North-western North America	Dendroctonus rufipennis	2002	(−)-α-pinene+ (±)-frontalin + (±)-MCOL	verbenone	Vb	Female attraction to lure	Female attraction to lure	33.2784	39.9	10	24	20.34	10
330	19	Pureswaran and Borden	2004	Canada	New repellent semiochemicals for three species of Dendroctonus (Coleoptera : Scolytidae).	British Columbia	North-western North America	Dendroctonus rufipennis	2002	(−)-α-pinene+ (±)-frontalin + (±)-MCOL	trans-verbenol	Hetro	Female attraction to lure	Female attraction to lure	20.5979	9.39	10	24	20.34	10
331	19	Pureswaran and Borden	2004	Canada	New repellent semiochemicals for three species of Dendroctonus (Coleoptera : Scolytidae).	British Columbia	North-western North America	Dendroctonus rufipennis	2002	(−)-α-pinene+ (±)-frontalin + (±)-MCOL	acetophenone	Homo	Female attraction to lure	Female attraction to lure	18.0619	13.89	10	24	20.34	10
332	19	Pureswaran and Borden	2004	Canada	New repellent semiochemicals for three species of Dendroctonus (Coleoptera : Scolytidae).	British Columbia	North-western North America	Dendroctonus rufipennis	2002	(−)-α-pinene+ (±)-frontalin + (±)-MCOL	1-octen-3-ol	Homo	Female attraction to lure	Female attraction to lure	9.64948	9.58	10	24	20.34	10
333	19	Pureswaran and Borden	2004	Canada	New repellent semiochemicals for three species of Dendroctonus (Coleoptera : Scolytidae).	British Columbia	North-western North America	Dendroctonus rufipennis	2002	(−)-α-pinene+ (±)-frontalin + (±)-MCOL	verbenone	Vb	Male attraction to lure	Male attraction to lure	15.8642	15.42	10	12.1605	9.56	10
334	19	Pureswaran and Borden	2004	Canada	New repellent semiochemicals for three species of Dendroctonus (Coleoptera : Scolytidae).	British Columbia	North-western North America	Dendroctonus rufipennis	2002	(−)-α-pinene+ (±)-frontalin + (±)-MCOL	trans-verbenol	Hetro	Male attraction to lure	Male attraction to lure	10.9259	7.61	10	12.1605	9.56	10
335	19	Pureswaran and Borden	2004	Canada	New repellent semiochemicals for three species of Dendroctonus (Coleoptera : Scolytidae).	British Columbia	North-western North America	Dendroctonus rufipennis	2002	(−)-α-pinene+ (±)-frontalin + (±)-MCOL	acetophenone	Homo	Male attraction to lure	Male attraction to lure	10.6173	7.22	10	12.1605	9.56	10
336	19	Pureswaran and Borden	2004	Canada	New repellent semiochemicals for three species of Dendroctonus (Coleoptera : Scolytidae).	British Columbia	North-western North America	Dendroctonus rufipennis	2002	(−)-α-pinene+ (±)-frontalin + (±)-MCOL	1-octen-3-ol	Homo	Male attraction to lure	Male attraction to lure	4.93827	4.68	10	12.1605	9.56	10
337	19	Pureswaran and Borden	2004	Canada	New repellent semiochemicals for three species of Dendroctonus (Coleoptera : Scolytidae).	British Columbia	North-western North America	Dendroctonus rufipennis	2002	(−)-α-pinene+ (±)-frontalin + (±)-MCOL	nonanal	NHV	Female attraction to lure	Female attraction to lure	2.14594	4.89	9	0.461028	0.72	9
338	19	Pureswaran and Borden	2004	Canada	New repellent semiochemicals for three species of Dendroctonus (Coleoptera : Scolytidae).	British Columbia	North-western North America	Dendroctonus rufipennis	2002	(−)-α-pinene+ (±)-frontalin + (±)-MCOL	exo-brevicomin	Hetro	Female attraction to lure	Female attraction to lure	1.81095	3.02	9	0.461028	0.72	9
339	19	Pureswaran and Borden	2004	Canada	New repellent semiochemicals for three species of Dendroctonus (Coleoptera : Scolytidae).	British Columbia	North-western North America	Dendroctonus rufipennis	2002	(−)-α-pinene+ (±)-frontalin + (±)-MCOL	endo-brevicomin	Hetro	Female attraction to lure	Female attraction to lure	0.52073	1.12	9	0.461028	0.72	9
340	19	Pureswaran and Borden	2004	Canada	New repellent semiochemicals for three species of Dendroctonus (Coleoptera : Scolytidae).	British Columbia	North-western North America	Dendroctonus rufipennis	2002	(−)-α-pinene+ (±)-frontalin + (±)-MCOL	nonanal	NHV	Male attraction to lure	Male attraction to lure	0.686384	0.86	9	0.348214	0.52	9
341	19	Pureswaran and Borden	2004	Canada	New repellent semiochemicals for three species of Dendroctonus (Coleoptera : Scolytidae).	British Columbia	North-western North America	Dendroctonus rufipennis	2002	(−)-α-pinene+ (±)-frontalin + (±)-MCOL	exo-brevicomin	Hetro	Male attraction to lure	Male attraction to lure	0.689732	1.34	9	0.348214	0.52	9
342	20	Bentz et al	2005	United States	A test of high-dose verbenone for stand-level protection of lodgepole and whitebark pine from mountain pine beetle (Coleoptera: Curculionidae: scolytinae) attacks.	Montana	Central western North America	Dendroctonus ponderosae	2001	trans-verbenol and exo_x0002_brevicomin	verbenone	Vb	Tree attack	Tree attack	3	2.45	6	41	7.35	6
343	20	Bentz et al	2005	United States	A test of high-dose verbenone for stand-level protection of lodgepole and whitebark pine from mountain pine beetle (Coleoptera: Curculionidae: scolytinae) attacks.	Idaho	Central western North America	Dendroctonus ponderosae	2001	trans-verbenol and exo_x0002_brevicomin	verbenone	Vb	Tree attack	Tree attack	3	2	4	6	4	4
344	20	Bentz et al	2005	United States	A test of high-dose verbenone for stand-level protection of lodgepole and whitebark pine from mountain pine beetle (Coleoptera: Curculionidae: scolytinae) attacks.	Idaho	Central western North America	Dendroctonus ponderosae	2001	trans-verbenol and exo_x0002_brevicomin	verbenone	Vb	Tree attack	Tree attack	0.75	1	4	12	22	4
345	20	Bentz et al	2005	United States	A test of high-dose verbenone for stand-level protection of lodgepole and whitebark pine from mountain pine beetle (Coleoptera: Curculionidae: scolytinae) attacks.	Montana	Central western North America	Dendroctonus ponderosae	2001	trans-verbenol and exo_x0002_brevicomin	verbenone	Vb	Tree attack	Tree attack	2	2.45	6	4	4.9	6
346	20	Bentz et al	2005	United States	A test of high-dose verbenone for stand-level protection of lodgepole and whitebark pine from mountain pine beetle (Coleoptera: Curculionidae: scolytinae) attacks.	Idaho	Central western North America	Dendroctonus ponderosae	2001	trans-verbenol and exo_x0002_brevicomin	verbenone	Vb	Tree attack	Tree attack	0.25	1	4	1	2	4
347	20	Bentz et al	2005	United States	A test of high-dose verbenone for stand-level protection of lodgepole and whitebark pine from mountain pine beetle (Coleoptera: Curculionidae: scolytinae) attacks.	Montana	Central western North America	Dendroctonus ponderosae	2002	trans-verbenol and exo_x0002_brevicomin	verbenone	Vb	Tree attack	Tree attack	14	14.94	6	26	17.15	6
348	20	Bentz et al	2005	United States	A test of high-dose verbenone for stand-level protection of lodgepole and whitebark pine from mountain pine beetle (Coleoptera: Curculionidae: scolytinae) attacks.	Montana	Central western North America	Dendroctonus ponderosae	2002	trans-verbenol and exo_x0002_brevicomin	verbenone	Vb	Tree attack	Tree attack	3	3.43	6	6	4.41	6
349	20	Bentz et al	2005	United States	A test of high-dose verbenone for stand-level protection of lodgepole and whitebark pine from mountain pine beetle (Coleoptera: Curculionidae: scolytinae) attacks.	Montana	Central western North America	Dendroctonus ponderosae	2002	trans-verbenol and exo_x0002_brevicomin	verbenone	Vb	Tree attack	Tree attack	10	9.31	6	26	17.15	6
350	20	Bentz et al	2005	United States	A test of high-dose verbenone for stand-level protection of lodgepole and whitebark pine from mountain pine beetle (Coleoptera: Curculionidae: scolytinae) attacks.	Montana	Central western North America	Dendroctonus ponderosae	2002	trans-verbenol and exo_x0002_brevicomin	verbenone	Vb	Tree attack	Tree attack	2	1.22	6	6	4.41	6
351	21	Fettig et al	2005	California	Nonhost angiosperm volatiles and verbenone disrupt response of western pine beetle, Dendroctonus brevicomis (Coleoptera: Scolytidae), to attractant-baited traps	California	South-western North America	Dendroctonus brevicomis	2004	(±)-frontalin, (±)-exo-brevicomin, myrcene	[(E)-2-hexenal+ (E)-2-hexen-1-ol + (Z)-2-hexen_x0002_1-ol]	NHV	Male attraction to lure	Male attraction to lure	43.3486	36.18	30	60.5505	55.78	30
352	21	Fettig et al	2005	California	Nonhost angiosperm volatiles and verbenone disrupt response of western pine beetle, Dendroctonus brevicomis (Coleoptera: Scolytidae), to attractant-baited traps	California	South-western North America	Dendroctonus brevicomis	2004	(±)-frontalin, (±)-exo-brevicomin, myrcene	[(E)-2-hexenal, (E)-2-hexen-1-ol, (Z)-2-hexen_x0002_1-ol]	NHV	Female attraction to lure	Female attraction to lure	84.4685	79.25	30	117.126	106.42	30
353	21	Fettig et al	2005	California	Nonhost angiosperm volatiles and verbenone disrupt response of western pine beetle, Dendroctonus brevicomis (Coleoptera: Scolytidae), to attractant-baited traps	California	South-western North America	Dendroctonus brevicomis	2004	(±)-frontalin, (±)-exo-brevicomin, myrcene	(benzyl alcohol, benzaldehyde, conopthorin, guaiacol, nonanal, salicylaldehyde)	NHV	Male attraction to lure	Male attraction to lure	42.7982	35.43	30	60.5505	55.78	30
354	21	Fettig et al	2005	California	Nonhost angiosperm volatiles and verbenone disrupt response of western pine beetle, Dendroctonus brevicomis (Coleoptera: Scolytidae), to attractant-baited traps	California	South-western North America	Dendroctonus brevicomis	2004	(±)-frontalin, (±)-exo-brevicomin, myrcene	(benzyl alcohol, benzaldehyde, conopthorin, guaiacol, nonanal, salicylaldehyde)	NHV	Female attraction to lure	Female attraction to lure	83.3661	70.95	30	117.126	106.42	30
355	21	Fettig et al	2005	California	Nonhost angiosperm volatiles and verbenone disrupt response of western pine beetle, Dendroctonus brevicomis (Coleoptera: Scolytidae), to attractant-baited traps	California	South-western North America	Dendroctonus brevicomis	2004	(±)-frontalin, (±)-exo-brevicomin, myrcene	(E)-2-hexenal, (E)-2-hexen-1-ol, (Z)-2-hexen_x0002_1-ol] (benzyl alcohol, benzaldehyde, conopthorin, guaiacol, nonanal, salicylaldehyde)	NHV	Male attraction to lure	Male attraction to lure	38.3945	37.69	30	60.5505	55.78	30
356	21	Fettig et al	2005	California	Nonhost angiosperm volatiles and verbenone disrupt response of western pine beetle, Dendroctonus brevicomis (Coleoptera: Scolytidae), to attractant-baited traps	California	South-western North America	Dendroctonus brevicomis	2004	(±)-frontalin, (±)-exo-brevicomin, myrcene	(E)-2-hexenal, (E)-2-hexen-1-ol, (Z)-2-hexen-1-ol] (benzyl alcohol, benzaldehyde, conopthorin, guaiacol, nonanal, salicylaldehyde)	NHV	Female attraction to lure	Female attraction to lure	74.5472	62.64	30	117.126	106.42	30
357	21	Fettig et al	2005	California	Nonhost angiosperm volatiles and verbenone disrupt response of western pine beetle, Dendroctonus brevicomis (Coleoptera: Scolytidae), to attractant-baited traps	California	South-western North America	Dendroctonus brevicomis	2004	(±)-frontalin, (±)-exo-brevicomin, myrcene	verbenone	Vb	Male attraction to lure	Male attraction to lure	33.8532	26.38	30	60.5505	55.78	30
358	21	Fettig et al	2005	California	Nonhost angiosperm volatiles and verbenone disrupt response of western pine beetle, Dendroctonus brevicomis (Coleoptera: Scolytidae), to attractant-baited traps	California	South-western North America	Dendroctonus brevicomis	2004	(±)-frontalin, (±)-exo-brevicomin, myrcene	verbenone	Vb	Female attraction to lure	Female attraction to lure	60.4921	50.57	30	117.126	106.42	30
359	21	Fettig et al	2005	California	Nonhost angiosperm volatiles and verbenone disrupt response of western pine beetle, Dendroctonus brevicomis (Coleoptera: Scolytidae), to attractant-baited traps	California	South-western North America	Dendroctonus brevicomis	2004	(±)-frontalin, (±)-exo-brevicomin, myrcene	(benzyl alcohol, benzaldehyde, conopthorin, guaiacol, nonanal, salicylaldehyde)+verbenone	Vb+NHV	Male attraction to lure	Male attraction to lure	23.8073	20.35	30	60.5505	55.78	30
360	21	Fettig et al	2005	California	Nonhost angiosperm volatiles and verbenone disrupt response of western pine beetle, Dendroctonus brevicomis (Coleoptera: Scolytidae), to attractant-baited traps	California	South-western North America	Dendroctonus brevicomis	2004	(±)-frontalin, (±)-exo-brevicomin, myrcene	(benzyl alcohol, benzaldehyde, conopthorin, guaiacol, nonanal, salicylaldehyde)+verbenone	Vb+NHV	Female attraction to lure	Female attraction to lure	44.3701	43.02	30	117.126	106.42	30
361	21	Fettig et al	2005	California	Nonhost angiosperm volatiles and verbenone disrupt response of western pine beetle, Dendroctonus brevicomis (Coleoptera: Scolytidae), to attractant-baited traps	California	South-western North America	Dendroctonus brevicomis	2004	(±)-frontalin, (±)-exo-brevicomin, myrcene	[(E)-2-hexenal, (E)-2-hexen-1-ol, (Z)-2-hexen-1-ol] verbenone	Vb+NHV	Male attraction to lure	Male attraction to lure	21.7431	15.83	30	60.5505	55.78	30
362	21	Fettig et al	2005	California	Nonhost angiosperm volatiles and verbenone disrupt response of western pine beetle, Dendroctonus brevicomis (Coleoptera: Scolytidae), to attractant-baited traps	California	South-western North America	Dendroctonus brevicomis	2004	(±)-frontalin, (±)-exo-brevicomin, myrcene	[(E)-2-hexenal, (E)-2-hexen-1-ol, (Z)-2-hexen-1-ol] verbenone	Vb+NHV	Female attraction to lure	Female attraction to lure	44.0945	37.74	30	117.126	106.42	30
363	21	Fettig et al	2005	California	Nonhost angiosperm volatiles and verbenone disrupt response of western pine beetle, Dendroctonus brevicomis (Coleoptera: Scolytidae), to attractant-baited traps	California	South-western North America	Dendroctonus brevicomis	2004	(±)-frontalin, (±)-exo-brevicomin, myrcene	(E)-2-hexenal, (E)-2-hexen-1-ol, (Z)-2-hexen-1-ol] (benzyl alcohol, benzaldehyde, conopthorin, guaiacol, nonanal, salicylaldehyde)+verbenone	Vb+NHV	Male attraction to lure	Male attraction to lure	10.0459	12.06	30	60.5505	55.78	30
364	21	Fettig et al	2005	California	Nonhost angiosperm volatiles and verbenone disrupt response of western pine beetle, Dendroctonus brevicomis (Coleoptera: Scolytidae), to attractant-baited traps	California	South-western North America	Dendroctonus brevicomis	2004	(±)-frontalin, (±)-exo-brevicomin, myrcene	(E)-2-hexenal, (E)-2-hexen-1-ol, (Z)-2-hexen-1-ol] (benzyl alcohol, benzaldehyde, conopthorin, guaiacol, nonanal, salicylaldehyde)+verbenone	Vb+NHV	Female attraction to lure	Female attraction to lure	18.6024	19.62	30	117.126	106.42	30
365	21	Fettig et al	2005	California	Nonhost angiosperm volatiles and verbenone disrupt response of western pine beetle, Dendroctonus brevicomis (Coleoptera: Scolytidae), to attractant-baited traps	California	South-western North America	Dendroctonus brevicomis	2004	(±)-frontalin, (±)-exo-brevicomin, myrcene	verbenone	Vb	Male attraction to lure	Male attraction to lure	34.3701	30.41	30	54.5669	29.76	30
366	21	Fettig et al	2005	California	Nonhost angiosperm volatiles and verbenone disrupt response of western pine beetle, Dendroctonus brevicomis (Coleoptera: Scolytidae), to attractant-baited traps	California	South-western North America	Dendroctonus brevicomis	2004	(±)-frontalin, (±)-exo-brevicomin, myrcene	verbenone	Vb	Female attraction to lure	Female attraction to lure	70.1283	55.8	30	107.917	53.2	30
367	21	Fettig et al	2005	California	Nonhost angiosperm volatiles and verbenone disrupt response of western pine beetle, Dendroctonus brevicomis (Coleoptera: Scolytidae), to attractant-baited traps	California	South-western North America	Dendroctonus brevicomis	2004	(±)-frontalin, (±)-exo-brevicomin, myrcene	verbenone	Vb	Male attraction to lure	Male attraction to lure	26.3386	27.17	30	54.5669	29.76	30
368	21	Fettig et al	2005	California	Nonhost angiosperm volatiles and verbenone disrupt response of western pine beetle, Dendroctonus brevicomis (Coleoptera: Scolytidae), to attractant-baited traps	California	South-western North America	Dendroctonus brevicomis	2004	(±)-frontalin, (±)-exo-brevicomin, myrcene	verbenone	Vb	Female attraction to lure	Female attraction to lure	57.9269	51.91	30	107.917	53.2	30
369	21	Fettig et al	2005	California	Nonhost angiosperm volatiles and verbenone disrupt response of western pine beetle, Dendroctonus brevicomis (Coleoptera: Scolytidae), to attractant-baited traps	California	South-western North America	Dendroctonus brevicomis	2004	(±)-frontalin, (±)-exo-brevicomin, myrcene	[(E)-2-hexenal, benzaldehyde, nonanal, salicylaldehyde] +verbenone	Vb+NHV	Male attraction to lure	Male attraction to lure	20.0787	20.05	30	54.5669	29.76	30
370	21	Fettig et al	2005	California	Nonhost angiosperm volatiles and verbenone disrupt response of western pine beetle, Dendroctonus brevicomis (Coleoptera: Scolytidae), to attractant-baited traps	California	South-western North America	Dendroctonus brevicomis	2004	(±)-frontalin, (±)-exo-brevicomin, myrcene	[(E)-2-hexenal, benzaldehyde, nonanal, salicylaldehyde] +verbenone	Vb+NHV	Female attraction to lure	Female attraction to lure	50.9378	42.17	30	107.917	53.2	30
371	21	Fettig et al	2005	California	Nonhost angiosperm volatiles and verbenone disrupt response of western pine beetle, Dendroctonus brevicomis (Coleoptera: Scolytidae), to attractant-baited traps	California	South-western North America	Dendroctonus brevicomis	2004	(±)-frontalin, (±)-exo-brevicomin, myrcene	[(E)-2-hexenal, benzaldehyde, nonanal, salicylaldehyde] +verbenone	Vb+NHV	Male attraction to lure	Male attraction to lure	19.3701	18.11	30	54.5669	29.76	30
372	21	Fettig et al	2005	California	Nonhost angiosperm volatiles and verbenone disrupt response of western pine beetle, Dendroctonus brevicomis (Coleoptera: Scolytidae), to attractant-baited traps	California	South-western North America	Dendroctonus brevicomis	2004	(±)-frontalin, (±)-exo-brevicomin, myrcene	[(E)-2-hexenal, benzaldehyde, nonanal, salicylaldehyde] +verbenone	Vb+NHV	Female attraction to lure	Female attraction to lure	50.464	37.63	30	107.917	53.2	30
373	21	Fettig et al	2005	California	Nonhost angiosperm volatiles and verbenone disrupt response of western pine beetle, Dendroctonus brevicomis (Coleoptera: Scolytidae), to attractant-baited traps	California	South-western North America	Dendroctonus brevicomis	2004	(±)-frontalin, (±)-exo-brevicomin, myrcene	[(E)-2- hexen-1-ol, (Z)-2-hexen-1-ol, benzyl alcohol, guaiacol]+verbenone	Vb+NHV	Male attraction to lure	Male attraction to lure	13.4646	12.94	30	54.5669	29.76	30
374	21	Fettig et al	2005	California	Nonhost angiosperm volatiles and verbenone disrupt response of western pine beetle, Dendroctonus brevicomis (Coleoptera: Scolytidae), to attractant-baited traps	California	South-western North America	Dendroctonus brevicomis	2004	(±)-frontalin, (±)-exo-brevicomin, myrcene	[(E)-2- hexen-1-ol, (Z)-2-hexen-1-ol, benzyl alcohol, guaiacol]+verbenone	Vb+NHV	Female attraction to lure	Female attraction to lure	35.8934	36.98	30	107.917	53.2	30
375	21	Fettig et al	2005	California	Nonhost angiosperm volatiles and verbenone disrupt response of western pine beetle, Dendroctonus brevicomis (Coleoptera: Scolytidae), to attractant-baited traps	California	South-western North America	Dendroctonus brevicomis	2004	(±)-frontalin, (±)-exo-brevicomin, myrcene	[(E)-2- hexen-1-ol, (Z)-2-hexen-1-ol, benzyl alcohol, guaiacol]+verbenone	Vb+NHV	Male attraction to lure	Male attraction to lure	10.748	11	30	54.5669	29.76	30
376	21	Fettig et al	2005	California	Nonhost angiosperm volatiles and verbenone disrupt response of western pine beetle, Dendroctonus brevicomis (Coleoptera: Scolytidae), to attractant-baited traps	California	South-western North America	Dendroctonus brevicomis	2004	(±)-frontalin, (±)-exo-brevicomin, myrcene	[(E)-2- hexen-1-ol, (Z)-2-hexen-1-ol, benzyl alcohol, guaiacol]+verbenone	Vb+NHV	Female attraction to lure	Female attraction to lure	31.7473	33.09	30	107.917	53.2	30
377	21	Fettig et al	2005	California	Nonhost angiosperm volatiles and verbenone disrupt response of western pine beetle, Dendroctonus brevicomis (Coleoptera: Scolytidae), to attractant-baited traps	California	South-western North America	Dendroctonus brevicomis	2004	(±)-frontalin, (±)-exo-brevicomin, myrcene	[(E)-2- hexen-1-ol, (Z)-2-hexen-1-ol, benzyl alcohol, guaiacol]+[(E)-2-hexenal, benzaldehyde, nonanal, salicylaldehyde] +verbenone	Vb+NHV	Male attraction to lure	Male attraction to lure	9.92126	12.29	30	54.5669	29.76	30
378	21	Fettig et al	2005	California	Nonhost angiosperm volatiles and verbenone disrupt response of western pine beetle, Dendroctonus brevicomis (Coleoptera: Scolytidae), to attractant-baited traps	California	South-western North America	Dendroctonus brevicomis	2004	(±)-frontalin, (±)-exo-brevicomin, myrcene	[(E)-2- hexen-1-ol, (Z)-2-hexen-1-ol, benzyl alcohol, guaiacol]+[(E)-2-hexenal, benzaldehyde, nonanal, salicylaldehyde] +verbenone	Vb+NHV	Female attraction to lure	Female attraction to lure	26.535	26.6	30	107.917	53.2	30
379	21	Fettig et al	2005	California	Nonhost angiosperm volatiles and verbenone disrupt response of western pine beetle, Dendroctonus brevicomis (Coleoptera: Scolytidae), to attractant-baited traps	California	South-western North America	Dendroctonus brevicomis	2004	(±)-frontalin, (±)-exo-brevicomin, myrcene	trans-Conophthorin+[(E)-2- hexen-1-ol, (Z)-2-hexen-1-ol, benzyl alcohol, guaiacol]+[(E)-2-hexenal, benzaldehyde, nonanal, salicylaldehyde] +verbenone	Vb+NHV	Male attraction to lure	Male attraction to lure	7.91339	11	30	54.5669	29.76	30
380	21	Fettig et al	2005	California	Nonhost angiosperm volatiles and verbenone disrupt response of western pine beetle, Dendroctonus brevicomis (Coleoptera: Scolytidae), to attractant-baited traps	California	South-western North America	Dendroctonus brevicomis	2004	(±)-frontalin, (±)-exo-brevicomin, myrcene	trans-Conophthorin+[(E)-2- hexen-1-ol, (Z)-2-hexen-1-ol, benzyl alcohol, guaiacol]+[(E)-2-hexenal, benzaldehyde, nonanal, salicylaldehyde] +verbenone	Vb+NHV	Female attraction to lure	Female attraction to lure	20.4936	25.95	30	107.917	53.2	30
381	21	Fettig et al	2005	California	Nonhost angiosperm volatiles and verbenone disrupt response of western pine beetle, Dendroctonus brevicomis (Coleoptera: Scolytidae), to attractant-baited traps	California	South-western North America	Dendroctonus brevicomis	2004	(±)-frontalin, (±)-exo-brevicomin, myrcene	trans-Conophthorin+[(E)-2- hexen-1-ol, (Z)-2-hexen-1-ol, benzyl alcohol, guaiacol]+[(E)-2-hexenal, benzaldehyde, nonanal, salicylaldehyde] +verbenone	Vb+NHV	Male attraction to lure	Male attraction to lure	6.14173	6.47	30	54.5669	29.76	30
382	21	Fettig et al	2005	California	Nonhost angiosperm volatiles and verbenone disrupt response of western pine beetle, Dendroctonus brevicomis (Coleoptera: Scolytidae), to attractant-baited traps	California	South-western North America	Dendroctonus brevicomis	2004	(±)-frontalin, (±)-exo-brevicomin, myrcene	trans-Conophthorin+[(E)-2- hexen-1-ol, (Z)-2-hexen-1-ol, benzyl alcohol, guaiacol]+[(E)-2-hexenal, benzaldehyde, nonanal, salicylaldehyde] +verbenone	Vb+NHV	Female attraction to lure	Female attraction to lure	17.8875	16.22	30	107.917	53.2	30
383	21	Fettig et al	2005	California	Nonhost angiosperm volatiles and verbenone disrupt response of western pine beetle, Dendroctonus brevicomis (Coleoptera: Scolytidae), to attractant-baited traps	California	South-western North America	Dendroctonus brevicomis	2004	(±)-frontalin, (±)-exo-brevicomin, myrcene	[(E)-2- hexen-1-ol, (Z)-2-hexen-1-ol, benzyl alcohol, guaiacol]+[(E)-2-hexenal, benzaldehyde, nonanal, salicylaldehyde] +verbenone	Vb+NHV	Male attraction to lure	Male attraction to lure	5.66929	9.06	30	54.5669	29.76	30
384	21	Fettig et al	2005	California	Nonhost angiosperm volatiles and verbenone disrupt response of western pine beetle, Dendroctonus brevicomis (Coleoptera: Scolytidae), to attractant-baited traps	California	South-western North America	Dendroctonus brevicomis	2004	(±)-frontalin, (±)-exo-brevicomin, myrcene	[(E)-2- hexen-1-ol, (Z)-2-hexen-1-ol, benzyl alcohol, guaiacol]+[(E)-2-hexenal, benzaldehyde, nonanal, salicylaldehyde] +verbenone	Vb+NHV	Female attraction to lure	Female attraction to lure	15.8736	22.06	30	107.917	53.2	30
385	22	Fettig et al	2005	California	Disruption of red turpentine beetle attraction to baited traps by the addition of California fivespined ips pheromone components.	California	South-western North America	Dendroctonus valens	2004	(α)-Pinene,(β)-Pinene, 3-carene	IPS ((±)Ipsenol, (+)-ipsdienol, and (–)-cis-verbenol	Homo+Hetro	Attraction to lure	Attraction to lure	9.4	9.39	45	15.7	15.43	45
386	22	Fettig et al	2005	California	Disruption of red turpentine beetle attraction to baited traps by the addition of California fivespined ips pheromone components.	California	South-western North America	Dendroctonus valens	2004	(α)-Pinene,(β)-Pinene, 3-carene	(2X) IPS ((±)Ipsenol, (+)-ipsdienol, and (–)-cis-verbenol	Homo+Hetro	Attraction to lure	Attraction to lure	10.3	9.39	45	15.7	15.43	45
387	22	Fettig et al	2005	California	Disruption of red turpentine beetle attraction to baited traps by the addition of California fivespined ips pheromone components.	California	South-western North America	Dendroctonus valens	2004	(α)-Pinene,(β)-Pinene, 3-carene	RIPS ((±)Ipsenol, (±)-ipsdienol, and (–)-cis-verbenol	Homo+Hetro	Attraction to lure	Attraction to lure	8.5	6.71	45	15.7	15.43	45
388	22	Fettig et al	2005	California	Disruption of red turpentine beetle attraction to baited traps by the addition of California fivespined ips pheromone components.	California	South-western North America	Dendroctonus valens	2004	(α)-Pinene,(β)-Pinene, 3-carene	(2X) RIPS ((±)Ipsenol, (±)-ipsdienol, and (–)-cis-verbenol	Homo+Hetro	Attraction to lure	Attraction to lure	8.6	6.71	45	15.7	15.43	45
389	22	Fettig et al	2005	California	Disruption of red turpentine beetle attraction to baited traps by the addition of California fivespined ips pheromone components.	California	South-western North America	Ips paraconfusus	2004	(α)-Pinene,(β)-Pinene, 3-carene+ (2X) IPS ((±)Ipsenol, (+)-ipsdienol, and (–)-cis-verbenol	IPS ((±)Ipsenol, (+)-ipsdienol, and (–)-cis-verbenol+(α)-Pinene,(β)-Pinene, 3-carene	Homo+Hetro	Attraction to lure	Attraction to lure	20.8	26.16	45	63.7	81.17	45
390	22	Fettig et al	2005	California	Disruption of red turpentine beetle attraction to baited traps by the addition of California fivespined ips pheromone components.	California	South-western North America	Ips paraconfusus	2004	(α)-Pinene,(β)-Pinene, 3-carene+ (2X) IPS ((±)Ipsenol, (+)-ipsdienol, and (–)-cis-verbenol	RIPS ((±)Ipsenol, (±)-ipsdienol, and (–)-cis-verbenol	Homo+Hetro	Attraction to lure	Attraction to lure	1.2	2.01	45	63.7	81.17	45
391	22	Fettig et al	2005	California	Disruption of red turpentine beetle attraction to baited traps by the addition of California fivespined ips pheromone components.	California	South-western North America	Ips paraconfusus	2004	(2X) RIPS ((±)Ipsenol, (±)-ipsdienol, and (–)-cis-verbenol+(α)-Pinene,(β)-Pinene, 3-carene	RIPS ((±)Ipsenol, (±)-ipsdienol, and (–)-cis-verbenol+(α)-Pinene,(β)-Pinene, 3-carene	Homo+Hetro	Attraction to lure	Attraction to lure	1.2	2.01	45	1.9	3.35	45
392	23	Sullivan	2005	USA	Electrophysiological and behavioral responses of Dendroctonus frontalis (Coleoptera: Curculionidae) to volatiles isolated from conspecifics.	Mississippi	South-eastern North America	Dendroctonus frontalis	2004	Frontalin+ α-Pinene	Fenchyl_alcohol	Homo	Male attraction to lure	Male attraction to lure	3.45968	3.1	12	5.87097	6.23	12
393	23	Sullivan	2005	USA	Electrophysiological and behavioral responses of Dendroctonus frontalis (Coleoptera: Curculionidae) to volatiles isolated from conspecifics.	Mississippi	South-eastern North America	Dendroctonus frontalis	2004	Frontalin+ α-Pinene	Fenchyl_alcohol	Homo	Male attraction to lure	Male attraction to lure	1.1129	0.73	12	5.87097	6.23	12
394	23	Sullivan	2005	USA	Electrophysiological and behavioral responses of Dendroctonus frontalis (Coleoptera: Curculionidae) to volatiles isolated from conspecifics.	Mississippi	South-eastern North America	Dendroctonus frontalis	2004	Frontalin+ α-Pinene	Fenchyl_alcohol	Homo	Male attraction to lure	Male attraction to lure	0.580645	0.31	12	5.87097	6.23	12
395	23	Sullivan	2005	USA	Electrophysiological and behavioral responses of Dendroctonus frontalis (Coleoptera: Curculionidae) to volatiles isolated from conspecifics.	Mississippi	South-eastern North America	Dendroctonus frontalis	2004	Frontalin+ α-Pinene	Fenchyl_alcohol	Homo	Female attraction to lure	Female attraction to lure	0.788732	0.95	12	1.37626	1.51	12
396	23	Sullivan	2005	USA	Electrophysiological and behavioral responses of Dendroctonus frontalis (Coleoptera: Curculionidae) to volatiles isolated from conspecifics.	Mississippi	South-eastern North America	Dendroctonus frontalis	2004	Frontalin+ α-Pinene	Fenchyl_alcohol	Homo	Female attraction to lure	Female attraction to lure	0.418511	0.53	12	1.37626	1.51	12
397	23	Sullivan	2005	USA	Electrophysiological and behavioral responses of Dendroctonus frontalis (Coleoptera: Curculionidae) to volatiles isolated from conspecifics.	Mississippi	South-eastern North America	Dendroctonus frontalis	2004	Frontalin+ α-Pinene	Fenchyl_alcohol	Homo	Female attraction to lure	Female attraction to lure	0.112676	0.25	12	1.37626	1.51	12
398	23	Sullivan	2005	USA	Electrophysiological and behavioral responses of Dendroctonus frontalis (Coleoptera: Curculionidae) to volatiles isolated from conspecifics.	Mississippi	South-eastern North America	Dendroctonus frontalis	2004	Frontalin+ α-Pinene	Cis-verbenol	Homo	Male attraction to lure	Male attraction to lure	14.4737	12.58	14	12.4269	12.91	14
399	23	Sullivan	2005	USA	Electrophysiological and behavioral responses of Dendroctonus frontalis (Coleoptera: Curculionidae) to volatiles isolated from conspecifics.	Mississippi	South-eastern North America	Dendroctonus frontalis	2004	Frontalin+ α-Pinene	Cis-verbenol	Homo	Male attraction to lure	Male attraction to lure	12.9532	14.33	14	12.4269	12.91	14
400	23	Sullivan	2005	USA	Electrophysiological and behavioral responses of Dendroctonus frontalis (Coleoptera: Curculionidae) to volatiles isolated from conspecifics.	Mississippi	South-eastern North America	Dendroctonus frontalis	2004	Frontalin+ α-Pinene	Cis-verbenol	Homo	Male attraction to lure	Male attraction to lure	18.7719	18.71	14	12.4269	12.91	14
401	23	Sullivan	2005	USA	Electrophysiological and behavioral responses of Dendroctonus frontalis (Coleoptera: Curculionidae) to volatiles isolated from conspecifics.	Mississippi	South-eastern North America	Dendroctonus frontalis	2004	Frontalin+ α-Pinene	Cis-verbenol	Homo	Female attraction to lure	Female attraction to lure	6.1284	6.33	14	6.62451	8.63	14
402	23	Sullivan	2005	USA	Electrophysiological and behavioral responses of Dendroctonus frontalis (Coleoptera: Curculionidae) to volatiles isolated from conspecifics.	Mississippi	South-eastern North America	Dendroctonus frontalis	2004	Frontalin+ α-Pinene	Cis-verbenol	Homo	Female attraction to lure	Female attraction to lure	6.88716	5.46	14	6.62451	8.63	14
403	23	Sullivan	2005	USA	Electrophysiological and behavioral responses of Dendroctonus frontalis (Coleoptera: Curculionidae) to volatiles isolated from conspecifics.	Mississippi	South-eastern North America	Dendroctonus frontalis	2004	Frontalin+ α-Pinene	Cis-verbenol	Homo	Female attraction to lure	Female attraction to lure	12.6654	11.9	14	6.62451	8.63	14
404	23	Sullivan	2005	USA	Electrophysiological and behavioral responses of Dendroctonus frontalis (Coleoptera: Curculionidae) to volatiles isolated from conspecifics.	Mississippi	South-eastern North America	Dendroctonus frontalis	2004	Frontalin+ α-Pinene	Acetenophone	Homo	Male attraction to lure	Male attraction to lure	1.63276	2.43	14	5.72259	7.62	14
405	23	Sullivan	2005	USA	Electrophysiological and behavioral responses of Dendroctonus frontalis (Coleoptera: Curculionidae) to volatiles isolated from conspecifics.	Mississippi	South-eastern North America	Dendroctonus frontalis	2004	Frontalin+ α-Pinene	Acetenophone	Homo	Male attraction to lure	Male attraction to lure	1.00661	1.28	14	5.72259	7.62	14
406	23	Sullivan	2005	USA	Electrophysiological and behavioral responses of Dendroctonus frontalis (Coleoptera: Curculionidae) to volatiles isolated from conspecifics.	Mississippi	South-eastern North America	Dendroctonus frontalis	2004	Frontalin+ α-Pinene	Acetenophone	Homo	Male attraction to lure	Male attraction to lure	0.77675	0.95	14	5.72259	7.62	14
407	23	Sullivan	2005	USA	Electrophysiological and behavioral responses of Dendroctonus frontalis (Coleoptera: Curculionidae) to volatiles isolated from conspecifics.	Mississippi	South-eastern North America	Dendroctonus frontalis	2004	Frontalin+ α-Pinene	Acetenophone	Homo	Female attraction to lure	Female attraction to lure	0.71076	0.89	14	1.43731	1.54	14
408	23	Sullivan	2005	USA	Electrophysiological and behavioral responses of Dendroctonus frontalis (Coleoptera: Curculionidae) to volatiles isolated from conspecifics.	Mississippi	South-eastern North America	Dendroctonus frontalis	2004	Frontalin+ α-Pinene	Acetenophone	Homo	Female attraction to lure	Female attraction to lure	0.521224	0.71	14	1.43731	1.54	14
409	23	Sullivan	2005	USA	Electrophysiological and behavioral responses of Dendroctonus frontalis (Coleoptera: Curculionidae) to volatiles isolated from conspecifics.	Mississippi	South-eastern North America	Dendroctonus frontalis	2004	Frontalin+ α-Pinene	Acetenophone	Homo	Female attraction to lure	Female attraction to lure	0.47384	0.47	14	1.43731	1.54	14
410	23	Sullivan	2005	USA	Electrophysiological and behavioral responses of Dendroctonus frontalis (Coleoptera: Curculionidae) to volatiles isolated from conspecifics.	Mississippi	South-eastern North America	Dendroctonus frontalis	2004	Frontalin+ α-Pinene	Cis-myrtenol	Homo	Male attraction to lure	Male attraction to lure	4.51398	2.88	12	4.86551	4.62	12
411	23	Sullivan	2005	USA	Electrophysiological and behavioral responses of Dendroctonus frontalis (Coleoptera: Curculionidae) to volatiles isolated from conspecifics.	Mississippi	South-eastern North America	Dendroctonus frontalis	2004	Frontalin+ α-Pinene	Cis-myrtenol	Homo	Male attraction to lure	Male attraction to lure	2.07723	1.99	12	4.86551	4.62	12
412	23	Sullivan	2005	USA	Electrophysiological and behavioral responses of Dendroctonus frontalis (Coleoptera: Curculionidae) to volatiles isolated from conspecifics.	Mississippi	South-eastern North America	Dendroctonus frontalis	2004	Frontalin+ α-Pinene	Cis-myrtenol	Homo	Male attraction to lure	Male attraction to lure	1.03063	0.86	12	4.86551	4.62	12
413	23	Sullivan	2005	USA	Electrophysiological and behavioral responses of Dendroctonus frontalis (Coleoptera: Curculionidae) to volatiles isolated from conspecifics.	Mississippi	South-eastern North America	Dendroctonus frontalis	2004	Frontalin+ α-Pinene	Cis-myrtenol	Homo	Female attraction to lure	Female attraction to lure	1.0993	0.97	12	1.09127	0.97	12
414	23	Sullivan	2005	USA	Electrophysiological and behavioral responses of Dendroctonus frontalis (Coleoptera: Curculionidae) to volatiles isolated from conspecifics.	Mississippi	South-eastern North America	Dendroctonus frontalis	2004	Frontalin+ α-Pinene	Cis-myrtenol	Homo	Female attraction to lure	Female attraction to lure	0.288867	0.53	12	1.09127	0.97	12
415	23	Sullivan	2005	USA	Electrophysiological and behavioral responses of Dendroctonus frontalis (Coleoptera: Curculionidae) to volatiles isolated from conspecifics.	Mississippi	South-eastern North America	Dendroctonus frontalis	2004	Frontalin+ α-Pinene	Cis-myrtenol	Homo	Female attraction to lure	Female attraction to lure	0.104313	0.14	12	1.09127	0.97	12
416	23	Sullivan	2005	USA	Electrophysiological and behavioral responses of Dendroctonus frontalis (Coleoptera: Curculionidae) to volatiles isolated from conspecifics.	Mississippi	South-eastern North America	Dendroctonus frontalis	2004	Frontalin+ α-Pinene	myrtenol	Homo	Male attraction to lure	Male attraction to lure	5.44724	7.9	14	6.11055	7.75	14
417	23	Sullivan	2005	USA	Electrophysiological and behavioral responses of Dendroctonus frontalis (Coleoptera: Curculionidae) to volatiles isolated from conspecifics.	Mississippi	South-eastern North America	Dendroctonus frontalis	2004	Frontalin+ α-Pinene	myrtenol	Homo	Male attraction to lure	Male attraction to lure	4.57286	6.24	14	6.11055	7.75	14
418	23	Sullivan	2005	USA	Electrophysiological and behavioral responses of Dendroctonus frontalis (Coleoptera: Curculionidae) to volatiles isolated from conspecifics.	Mississippi	South-eastern North America	Dendroctonus frontalis	2004	Frontalin+ α-Pinene	myrtenol	Homo	Male attraction to lure	Male attraction to lure	2.1809	4.06	14	6.11055	7.75	14
419	23	Sullivan	2005	USA	Electrophysiological and behavioral responses of Dendroctonus frontalis (Coleoptera: Curculionidae) to volatiles isolated from conspecifics.	Mississippi	South-eastern North America	Dendroctonus frontalis	2004	Frontalin+ α-Pinene	myrtenol	Homo	Female attraction to lure	Female attraction to lure	1.47184	2.21	14	2.28285	3.52	14
420	23	Sullivan	2005	USA	Electrophysiological and behavioral responses of Dendroctonus frontalis (Coleoptera: Curculionidae) to volatiles isolated from conspecifics.	Mississippi	South-eastern North America	Dendroctonus frontalis	2004	Frontalin+ α-Pinene	myrtenol	Homo	Female attraction to lure	Female attraction to lure	1.83229	2.44	14	2.28285	3.52	14
421	23	Sullivan	2005	USA	Electrophysiological and behavioral responses of Dendroctonus frontalis (Coleoptera: Curculionidae) to volatiles isolated from conspecifics.	Mississippi	South-eastern North America	Dendroctonus frontalis	2004	Frontalin+ α-Pinene	myrtenol	Homo	Female attraction to lure	Female attraction to lure	0.720901	1.69	14	2.28285	3.52	14
422	23	Sullivan	2005	USA	Electrophysiological and behavioral responses of Dendroctonus frontalis (Coleoptera: Curculionidae) to volatiles isolated from conspecifics.	Mississippi	South-eastern North America	Dendroctonus frontalis	2004	Frontalin+ α-Pinene	trans_pinocarveol	Homo	Male attraction to lure	Male attraction to lure	0.8	0.6	14	2.796	2.78	14
423	23	Sullivan	2005	USA	Electrophysiological and behavioral responses of Dendroctonus frontalis (Coleoptera: Curculionidae) to volatiles isolated from conspecifics.	Mississippi	South-eastern North America	Dendroctonus frontalis	2004	Frontalin+ α-Pinene	trans_pinocarveol	Homo	Male attraction to lure	Male attraction to lure	0.72	0.79	14	2.796	2.78	14
424	23	Sullivan	2005	USA	Electrophysiological and behavioral responses of Dendroctonus frontalis (Coleoptera: Curculionidae) to volatiles isolated from conspecifics.	Mississippi	South-eastern North America	Dendroctonus frontalis	2004	Frontalin+ α-Pinene	trans_pinocarveol	Homo	Male attraction to lure	Male attraction to lure	0.52	0.55	14	2.796	2.78	14
425	23	Sullivan	2005	USA	Electrophysiological and behavioral responses of Dendroctonus frontalis (Coleoptera: Curculionidae) to volatiles isolated from conspecifics.	Mississippi	South-eastern North America	Dendroctonus frontalis	2004	Frontalin+ α-Pinene	trans_pinocarveol	Homo	Female attraction to lure	Female attraction to lure	0.288	0.24	14	0.6	0.54	14
426	23	Sullivan	2005	USA	Electrophysiological and behavioral responses of Dendroctonus frontalis (Coleoptera: Curculionidae) to volatiles isolated from conspecifics.	Mississippi	South-eastern North America	Dendroctonus frontalis	2004	Frontalin+ α-Pinene	trans_pinocarveol	Homo	Female attraction to lure	Female attraction to lure	0.148	0.21	14	0.6	0.54	14
427	23	Sullivan	2005	USA	Electrophysiological and behavioral responses of Dendroctonus frontalis (Coleoptera: Curculionidae) to volatiles isolated from conspecifics.	Mississippi	South-eastern North America	Dendroctonus frontalis	2004	Frontalin+ α-Pinene	trans_pinocarveol	Homo	Female attraction to lure	Female attraction to lure	0.204	0.4	14	0.6	0.54	14
428	23	Sullivan	2005	USA	Electrophysiological and behavioral responses of Dendroctonus frontalis (Coleoptera: Curculionidae) to volatiles isolated from conspecifics.	Mississippi	South-eastern North America	Dendroctonus frontalis	2004	Frontalin+ α-Pinene	trans_myrtenol	Homo	Male attraction to lure	Male attraction to lure	7.57396	5.98	12	6.69625	6.29	12
429	23	Sullivan	2005	USA	Electrophysiological and behavioral responses of Dendroctonus frontalis (Coleoptera: Curculionidae) to volatiles isolated from conspecifics.	Mississippi	South-eastern North America	Dendroctonus frontalis	2004	Frontalin+ α-Pinene	trans_myrtenol	Homo	Male attraction to lure	Male attraction to lure	4.95069	4.37	12	6.69625	6.29	12
430	23	Sullivan	2005	USA	Electrophysiological and behavioral responses of Dendroctonus frontalis (Coleoptera: Curculionidae) to volatiles isolated from conspecifics.	Mississippi	South-eastern North America	Dendroctonus frontalis	2004	Frontalin+ α-Pinene	trans_myrtenol	Homo	Male attraction to lure	Male attraction to lure	2.81065	3.86	12	6.69625	6.29	12
431	23	Sullivan	2005	USA	Electrophysiological and behavioral responses of Dendroctonus frontalis (Coleoptera: Curculionidae) to volatiles isolated from conspecifics.	Mississippi	South-eastern North America	Dendroctonus frontalis	2004	Frontalin+ α-Pinene	trans_myrtenol	Homo	Female attraction to lure	Female attraction to lure	2.19877	1.73	12	1.55092	1.02	12
432	23	Sullivan	2005	USA	Electrophysiological and behavioral responses of Dendroctonus frontalis (Coleoptera: Curculionidae) to volatiles isolated from conspecifics.	Mississippi	South-eastern North America	Dendroctonus frontalis	2004	Frontalin+ α-Pinene	trans_myrtenol	Homo	Female attraction to lure	Female attraction to lure	1.27607	1.16	12	1.55092	1.02	12
433	23	Sullivan	2005	USA	Electrophysiological and behavioral responses of Dendroctonus frontalis (Coleoptera: Curculionidae) to volatiles isolated from conspecifics.	Mississippi	South-eastern North America	Dendroctonus frontalis	2004	Frontalin+ α-Pinene	trans_myrtenol	Homo	Female attraction to lure	Female attraction to lure	0.844172	1.22	12	1.55092	1.02	12
434	23	Sullivan	2005	USA	Electrophysiological and behavioral responses of Dendroctonus frontalis (Coleoptera: Curculionidae) to volatiles isolated from conspecifics.	Mississippi	South-eastern North America	Dendroctonus frontalis	2004	Frontalin+ α-Pinene	2-phenylethanol	Homo	Male attraction to lure	Male attraction to lure	4.16752	5.69	14	6.92543	6.42	14
435	23	Sullivan	2005	USA	Electrophysiological and behavioral responses of Dendroctonus frontalis (Coleoptera: Curculionidae) to volatiles isolated from conspecifics.	Mississippi	South-eastern North America	Dendroctonus frontalis	2004	Frontalin+ α-Pinene	2-phenylethanol	Homo	Male attraction to lure	Male attraction to lure	2.17569	3.25	14	6.92543	6.42	14
436	23	Sullivan	2005	USA	Electrophysiological and behavioral responses of Dendroctonus frontalis (Coleoptera: Curculionidae) to volatiles isolated from conspecifics.	Mississippi	South-eastern North America	Dendroctonus frontalis	2004	Frontalin+ α-Pinene	2-phenylethanol	Homo	Male attraction to lure	Male attraction to lure	2.8192	4.47	14	6.92543	6.42	14
437	23	Sullivan	2005	USA	Electrophysiological and behavioral responses of Dendroctonus frontalis (Coleoptera: Curculionidae) to volatiles isolated from conspecifics.	Mississippi	South-eastern North America	Dendroctonus frontalis	2004	Frontalin+ α-Pinene	2-phenylethanol	Homo	Female attraction to lure	Female attraction to lure	0.966921	1.07	14	1.45547	1.26	14
438	23	Sullivan	2005	USA	Electrophysiological and behavioral responses of Dendroctonus frontalis (Coleoptera: Curculionidae) to volatiles isolated from conspecifics.	Mississippi	South-eastern North America	Dendroctonus frontalis	2004	Frontalin+ α-Pinene	2-phenylethanol	Homo	Female attraction to lure	Female attraction to lure	0.834606	1.18	14	1.45547	1.26	14
439	23	Sullivan	2005	USA	Electrophysiological and behavioral responses of Dendroctonus frontalis (Coleoptera: Curculionidae) to volatiles isolated from conspecifics.	Mississippi	South-eastern North America	Dendroctonus frontalis	2004	Frontalin+ α-Pinene	2-phenylethanol	Homo	Female attraction to lure	Female attraction to lure	0.661578	0.88	14	1.45547	1.26	14
440	24	Campbell and Borden	2006	Canada	Integration of visual and olfactory cues of hosts and non-hosts by three bark beetles (Coleoptera: Scolytidae)	British Columbia	North-western North America	Dendroctonus pseudotsugae	2001	frontalin, ethanol, MCOL	benzyl alcohol + guaiacol	NHV	Male attraction to lure	Male attraction to lure	5.55387	7.84	14	9.26404	5.02	14
441	24	Campbell and Borden	2006	Canada	Integration of visual and olfactory cues of hosts and non-hosts by three bark beetles (Coleoptera: Scolytidae)	British Columbia	North-western North America	Dendroctonus pseudotsugae	2001	frontalin, ethanol, MCOL	benzyl alcohol + guaiacol	NHV	Female attraction to lure	Female attraction to lure	6.66667	6.24	14	6.05023	4.78	14
442	24	Campbell and Borden	2006	Canada	Integration of visual and olfactory cues of hosts and non-hosts by three bark beetles (Coleoptera: Scolytidae)	British Columbia	North-western North America	Dendroctonus pseudotsugae	2001	frontalin, ethanol, MCOL	MCH	Homo	Female attraction to lure	Female attraction to lure	117.004	16.46	15	216.599	58.8	15
443	24	Campbell and Borden	2006	Canada	Integration of visual and olfactory cues of hosts and non-hosts by three bark beetles (Coleoptera: Scolytidae)	British Columbia	North-western North America	Dendroctonus pseudotsugae	2001	frontalin, ethanol, MCOL	MCH	Homo	Male attraction to lure	Male attraction to lure	133.784	36.64	15	482.432	180.56	15
444	24	Campbell and Borden	2006	Canada	Integration of visual and olfactory cues of hosts and non-hosts by three bark beetles (Coleoptera: Scolytidae)	British Columbia	North-western North America	Dendroctonus pseudotsugae	2001	frontalin, ethanol, MCOL	MCH+benzyl alcohol + guaiacol	Homo+NHV	Male attraction to lure	Male attraction to lure	12.5103	2.32	16	100.952	70.29	16
445	24	Campbell and Borden	2006	Canada	Integration of visual and olfactory cues of hosts and non-hosts by three bark beetles (Coleoptera: Scolytidae)	British Columbia	North-western North America	Dendroctonus pseudotsugae	2001	frontalin, ethanol, MCOL	MCH+benzyl alcohol + guaiacol	Homo+NHV	Female attraction to lure	Female attraction to lure	11.684	0.2	16	39.3763	19.46	16
446	24	Campbell and Borden	2006	Canada	Integration of visual and olfactory cues of hosts and non-hosts by three bark beetles (Coleoptera: Scolytidae)	British Columbia	North-western North America	Dendroctonus pseudotsugae	2002	frontalin, ethanol, MCOL	benzyl alcohol+ hexanol	NHV	Female attraction to lure	Female attraction to lure	208.765	96.35	8	201.594	72.68	8
447	24	Campbell and Borden	2006	Canada	Integration of visual and olfactory cues of hosts and non-hosts by three bark beetles (Coleoptera: Scolytidae)	British Columbia	North-western North America	Dendroctonus pseudotsugae	2002	frontalin, ethanol, MCOL	benzyl alcohol+ hexanol	NHV	Male attraction to lure	Male attraction to lure	392.216	126.87	8	346.042	95.15	8
448	24	Campbell and Borden	2006	Canada	Integration of visual and olfactory cues of hosts and non-hosts by three bark beetles (Coleoptera: Scolytidae)	British Columbia	North-western North America	Dendroctonus pseudotsugae	2002	frontalin, ethanol, MCOL	benzyl alcohol+ hexanol	NHV	Male attraction to lure	Male attraction to lure	21.8365	19.86	15	27.6877	34.81	15
449	24	Campbell and Borden	2006	Canada	Integration of visual and olfactory cues of hosts and non-hosts by three bark beetles (Coleoptera: Scolytidae)	British Columbia	North-western North America	Dendroctonus pseudotsugae	2002	frontalin, ethanol, MCOL	benzyl alcohol+ hexanol	NHV	Female attraction to lure	Female attraction to lure	7.51515	7.04	15	10.9091	11.5	15
450	24	Campbell and Borden	2006	Canada	Integration of visual and olfactory cues of hosts and non-hosts by three bark beetles (Coleoptera: Scolytidae)	British Columbia	North-western North America	Dendroctonus ponderosae	2001	trans-verbenol,exo -brevicomin,myrcene	benzyl alcohol+ hexanol	NHV	Male attraction to lure	Male attraction to lure	59.887	64.83	14	94.162	74.69	14
451	24	Campbell and Borden	2006	Canada	Integration of visual and olfactory cues of hosts and non-hosts by three bark beetles (Coleoptera: Scolytidae)	British Columbia	North-western North America	Dendroctonus ponderosae	2001	trans-verbenol,exo -brevicomin,myrcene	benzyl alcohol+ hexanol	NHV	Female attraction to lure	Female attraction to lure	86.8421	139.26	14	189.85	165.98	14
452	24	Campbell and Borden	2006	Canada	Integration of visual and olfactory cues of hosts and non-hosts by three bark beetles (Coleoptera: Scolytidae)	British Columbia	North-western North America	Dendroctonus ponderosae	2001	trans-verbenol,exo -brevicomin,myrcene	guaiacol	NHV	Male attraction to lure	Male attraction to lure	19.0124	18.66	16	33.3593	26.59	16
453	24	Campbell and Borden	2006	Canada	Integration of visual and olfactory cues of hosts and non-hosts by three bark beetles (Coleoptera: Scolytidae)	British Columbia	North-western North America	Dendroctonus ponderosae	2001	trans-verbenol,exo -brevicomin,myrcene	guaiacol	NHV	Female attraction to lure	Female attraction to lure	27.7224	24.85	16	39.4555	39.57	16
454	24	Campbell and Borden	2006	Canada	Integration of visual and olfactory cues of hosts and non-hosts by three bark beetles (Coleoptera: Scolytidae)	British Columbia	North-western North America	Dendroctonus ponderosae	2001	trans-verbenol,exo -brevicomin,myrcene	verbenone	Vb	Male attraction to lure	Male attraction to lure	13.6468	23.84	15	108.104	143.02	15
455	24	Campbell and Borden	2006	Canada	Integration of visual and olfactory cues of hosts and non-hosts by three bark beetles (Coleoptera: Scolytidae)	British Columbia	North-western North America	Dendroctonus ponderosae	2001	trans-verbenol,exo -brevicomin,myrcene	verbenone	Vb	Female attraction to lure	Female attraction to lure	4.5406	12.41	15	69.7115	125.17	15
456	24	Campbell and Borden	2006	Canada	Integration of visual and olfactory cues of hosts and non-hosts by three bark beetles (Coleoptera: Scolytidae)	British Columbia	North-western North America	Dendroctonus ponderosae	2001	trans-verbenol,exo -brevicomin,myrcene	verbenone+benzyl alcohol+ hexanol	Vb+NHV	Male attraction to lure	Male attraction to lure	10.3806	0.19	14	428.201	713.7	14
457	24	Campbell and Borden	2006	Canada	Integration of visual and olfactory cues of hosts and non-hosts by three bark beetles (Coleoptera: Scolytidae)	British Columbia	North-western North America	Dendroctonus ponderosae	2001	trans-verbenol,exo -brevicomin,myrcene	verbenone+benzyl alcohol+ hexanol	Vb+NHV	Female attraction to lure	Female attraction to lure	10.3986	0.19	14	457.539	559.3	14
458	25	Zhang et al	2007	China	Electrophysiological and behavioral responses of Dendroctonus valens to non-host volatiles.	China	East Asia	Dendroctonus valens	2004	(+)-α-pinene: (-)-β-pinene: (+)-3-carene	Benzyl alcohol	NHV	Attraction to lure	Attraction to lure	53.8241	42.32	10	73.0402	26.91	10
459	25	Zhang et al	2007	China	Electrophysiological and behavioral responses of Dendroctonus valens to non-host volatiles.	China	East Asia	Dendroctonus valens	2004	(+)-α-pinene: (-)-β-pinene: (+)-3-carene	3-octanol	NHV	Attraction to lure	Attraction to lure	47.3231	30.53	10	73.0402	26.91	10
460	25	Zhang et al	2007	China	Electrophysiological and behavioral responses of Dendroctonus valens to non-host volatiles.	China	East Asia	Dendroctonus valens	2004	(+)-α-pinene: (-)-β-pinene: (+)-3-carene	1-hexanol	NHV	Attraction to lure	Attraction to lure	38.2409	21.77	10	73.0402	26.91	10
461	25	Zhang et al	2007	China	Electrophysiological and behavioral responses of Dendroctonus valens to non-host volatiles.	China	East Asia	Dendroctonus valens	2004	(+)-α-pinene: (-)-β-pinene: (+)-3-carene	Hexanal	NHV	Attraction to lure	Attraction to lure	34.5124	21.77	10	73.0402	26.91	10
462	25	Zhang et al	2007	China	Electrophysiological and behavioral responses of Dendroctonus valens to non-host volatiles.	China	East Asia	Dendroctonus valens	2004	(+)-α-pinene: (-)-β-pinene: (+)-3-carene	(E)-2-hexen-1-ol	NHV	Attraction to lure	Attraction to lure	24.8566	16.93	10	73.0402	26.91	10
463	25	Zhang et al	2007	China	Electrophysiological and behavioral responses of Dendroctonus valens to non-host volatiles.	China	East Asia	Dendroctonus valens	2004	(+)-α-pinene: (-)-β-pinene: (+)-3-carene	(Z)-3-hexen-1-ol	NHV	Attraction to lure	Attraction to lure	23.0402	21.46	10	73.0402	26.91	10
464	25	Zhang et al	2007	China	Electrophysiological and behavioral responses of Dendroctonus valens to non-host volatiles.	China	East Asia	Dendroctonus valens	2004	(+)-α-pinene: (-)-β-pinene: (+)-3-carene	1-octen-3-ol	NHV	Attraction to lure	Attraction to lure	22.4665	13.6	10	73.0402	26.91	10
465	26	Zhang et al	2007	Sweden	Electrophysiological and behavioral responses of Ips subelongatus to semiochemicals from its hosts, non-hosts, and conspecifics in China.	China	East Asia	Ips subelongatus	2002	3-methyl-3-buten-1-ol, ipsenol, and ipsdienol	α-pinene, β_x0002_pinene, and para-cymene (pC)	Host Repellent	Attraction to lure	Attraction to lure	2.7303	3.17	7	5.59378	6.28	7
466	26	Zhang et al	2007	Sweden	Electrophysiological and behavioral responses of Ips subelongatus to semiochemicals from its hosts, non-hosts, and conspecifics in China.	China	East Asia	Ips subelongatus	2002	3-methyl-3-buten-1-ol, ipsenol, and ipsdienol	cis-Verbenol	Hetro	Attraction to lure	Attraction to lure	0.421754	1.23	7	5.59378	6.28	7
467	26	Zhang et al	2007	Sweden	Electrophysiological and behavioral responses of Ips subelongatus to semiochemicals from its hosts, non-hosts, and conspecifics in China.	China	East Asia	Ips subelongatus	2002	3-methyl-3-buten-1-ol, ipsenol, and ipsdienol	Verbenone	Vb	Attraction to lure	Attraction to lure	2.46393	0.88	7	5.59378	6.28	7
468	26	Zhang et al	2007	Sweden	Electrophysiological and behavioral responses of Ips subelongatus to semiochemicals from its hosts, non-hosts, and conspecifics in China.	China	East Asia	Ips subelongatus	2002	3-methyl-3-buten-1-ol, ipsenol, and ipsdienol	geranyl acetone	NHV	Attraction to lure	Attraction to lure	3.14095	2.79	7	5.59378	6.28	7
469	26	Zhang et al	2007	Sweden	Electrophysiological and behavioral responses of Ips subelongatus to semiochemicals from its hosts, non-hosts, and conspecifics in China.	China	East Asia	Ips subelongatus	2003	(±)-Ipsenol	3-Methyl-3-buten_x0002_1-ol	Hetro	Attraction to lure	Attraction to lure	25.0272	12.9	10	29.1077	21.51	10
470	26	Zhang et al	2007	Sweden	Electrophysiological and behavioral responses of Ips subelongatus to semiochemicals from its hosts, non-hosts, and conspecifics in China.	China	East Asia	Ips subelongatus	2003	(±)-Ipsenol	Ipsdienol	Hetro	Attraction to lure	Attraction to lure	21.3275	19.1	10	29.1077	21.51	10
471	26	Zhang et al	2007	Sweden	Electrophysiological and behavioral responses of Ips subelongatus to semiochemicals from its hosts, non-hosts, and conspecifics in China.	China	East Asia	Ips subelongatus	2003	(±)-Ipsenol	2-Phenylethanol	Homo	Attraction to lure	Attraction to lure	26.7138	18.07	10	29.1077	21.51	10
472	27	Sullivan et al	2007	USA	Field evaluations of potential aggregation inhibitors for the southern pine beetle, Dendroctonus frontalis (Coleoptera: Curculionidae).	Georgia	South-eastern North America	Dendroctonus frontalis	2001	Frontalin+ α-Pinene	benzaldehyde	NHV	Male attraction to lure	Male attraction to lure	38.1955	2.03	6	30.6767	9.58	6
473	27	Sullivan et al	2007	USA	Field evaluations of potential aggregation inhibitors for the southern pine beetle, Dendroctonus frontalis (Coleoptera: Curculionidae).	Mississippi	South-eastern North America	Dendroctonus frontalis	2001	Frontalin+ α-Pinene	1-Hexanol+cis-3-Hexen-1-ol+ Hexanal+Nonanal	NHV	Male attraction to lure	Male attraction to lure	10.9023	8.84	6	30.6767	9.58	6
474	27	Sullivan et al	2007	USA	Field evaluations of potential aggregation inhibitors for the southern pine beetle, Dendroctonus frontalis (Coleoptera: Curculionidae).	Mississippi	South-eastern North America	Dendroctonus frontalis	2001	Frontalin+ α-Pinene	guaiacol	NHV	Male attraction to lure	Male attraction to lure	16.1654	8.66	6	30.6767	9.58	6
475	27	Sullivan et al	2007	USA	Field evaluations of potential aggregation inhibitors for the southern pine beetle, Dendroctonus frontalis (Coleoptera: Curculionidae).	Mississippi	South-eastern North America	Dendroctonus frontalis	2001	Frontalin+ α-Pinene	benzaldehyde+1-Hexanol+cis-3-Hexen-1-ol+ Hexanal+Nonanal+guaiacol	NHV	Male attraction to lure	Male attraction to lure	2.63158	4.97	6	30.6767	9.58	6
476	27	Sullivan et al	2007	USA	Field evaluations of potential aggregation inhibitors for the southern pine beetle, Dendroctonus frontalis (Coleoptera: Curculionidae).	Mississippi	South-eastern North America	Dendroctonus frontalis	2001	Frontalin+ α-Pinene+benzaldehyde	benzaldehyde+1-Hexanol+cis-3-Hexen-1-ol+ Hexanal+Nonanal+guaiacol	NHV	Male attraction to lure	Male attraction to lure	2.63158	4.97	6	38.1955	2.03	6
477	27	Sullivan et al	2007	USA	Field evaluations of potential aggregation inhibitors for the southern pine beetle, Dendroctonus frontalis (Coleoptera: Curculionidae).	Mississippi	South-eastern North America	Dendroctonus frontalis	2001	Frontalin+ α-Pinene	benzaldehyde	NHV	Female attraction to lure	Female attraction to lure	42.1132	29.76	6	22.1132	16.82	6
478	27	Sullivan et al	2007	USA	Field evaluations of potential aggregation inhibitors for the southern pine beetle, Dendroctonus frontalis (Coleoptera: Curculionidae).	Mississippi	South-eastern North America	Dendroctonus frontalis	2001	Frontalin+ α-Pinene	1-Hexanol+cis-3-Hexen-1-ol+ Hexanal+Nonanal	NHV	Female attraction to lure	Female attraction to lure	19.0189	17.19	6	22.1132	16.82	6
479	27	Sullivan et al	2007	USA	Field evaluations of potential aggregation inhibitors for the southern pine beetle, Dendroctonus frontalis (Coleoptera: Curculionidae).	Mississippi	South-eastern North America	Dendroctonus frontalis	2001	Frontalin+ α-Pinene	guaiacol	NHV	Female attraction to lure	Female attraction to lure	9.88679	7.95	6	22.1132	16.82	6
480	27	Sullivan et al	2007	USA	Field evaluations of potential aggregation inhibitors for the southern pine beetle, Dendroctonus frontalis (Coleoptera: Curculionidae).	Mississippi	South-eastern North America	Dendroctonus frontalis	2001	Frontalin+ α-Pinene	benzaldehyde+1-Hexanol+cis-3-Hexen-1-ol+ Hexanal+Nonanal+guaiacol	NHV	Female attraction to lure	Female attraction to lure	5.58491	10.54	6	22.1132	16.82	6
481	27	Sullivan et al	2007	USA	Field evaluations of potential aggregation inhibitors for the southern pine beetle, Dendroctonus frontalis (Coleoptera: Curculionidae).	Mississippi	South-eastern North America	Dendroctonus frontalis	2001	Frontalin+ α-Pinene+benzaldehyde	benzaldehyde+1-Hexanol+cis-3-Hexen-1-ol+ Hexanal+Nonanal+guaiacol	NHV	Female attraction to lure	Female attraction to lure	5.58491	10.54	6	42.1132	29.76	6
482	27	Sullivan et al	2007	USA	Field evaluations of potential aggregation inhibitors for the southern pine beetle, Dendroctonus frontalis (Coleoptera: Curculionidae).	Mississippi	South-eastern North America	Dendroctonus frontalis	2002	Frontalin+ α-Pinene+benzaldehyde	3-Methylcyclo-hex-2-en-1-ol	Hetro	Male attraction to lure	Male attraction to lure	32.5	10.09	6	31.3971	13.69	6
483	27	Sullivan et al	2007	USA	Field evaluations of potential aggregation inhibitors for the southern pine beetle, Dendroctonus frontalis (Coleoptera: Curculionidae).	Mississippi	South-eastern North America	Dendroctonus frontalis	2002	Frontalin+ α-Pinene+benzaldehyde	1-Hexanol+cis-3-Hexen-1-ol+ Hexanal+Nonanal	NHV	Male attraction to lure	Male attraction to lure	18.3824	8.47	6	31.3971	13.69	6
484	27	Sullivan et al	2007	USA	Field evaluations of potential aggregation inhibitors for the southern pine beetle, Dendroctonus frontalis (Coleoptera: Curculionidae).	Mississippi	South-eastern North America	Dendroctonus frontalis	2002	Frontalin+ α-Pinene+benzaldehyde	1-Hexanol+cis-3-Hexen-1-ol+ Hexanal+Nonanal+3-Methylcyclo-hex-2-en-1-ol	hetro+NHV	Male attraction to lure	Male attraction to lure	16.0294	9.01	6	31.3971	13.69	6
485	27	Sullivan et al	2007	USA	Field evaluations of potential aggregation inhibitors for the southern pine beetle, Dendroctonus frontalis (Coleoptera: Curculionidae).	Georgia	South-eastern North America	Dendroctonus frontalis	2002	Frontalin+ α-Pinene+benzaldehyde	3-Methylcyclo-hex-2-en-1-ol	Hetro	Female attraction to lure	Female attraction to lure	31.7301	9.2	6	37.4724	22.72	6
486	27	Sullivan et al	2007	USA	Field evaluations of potential aggregation inhibitors for the southern pine beetle, Dendroctonus frontalis (Coleoptera: Curculionidae).	Georgia	South-eastern North America	Dendroctonus frontalis	2002	Frontalin+ α-Pinene+benzaldehyde	1-Hexanol+cis-3-Hexen-1-ol+ Hexanal+Nonanal	NHV	Female attraction to lure	Female attraction to lure	18.9202	15.51	6	37.4724	22.72	6
487	27	Sullivan et al	2007	USA	Field evaluations of potential aggregation inhibitors for the southern pine beetle, Dendroctonus frontalis (Coleoptera: Curculionidae).	Georgia	South-eastern North America	Dendroctonus frontalis	2002	Frontalin+ α-Pinene+benzaldehyde	1-Hexanol+cis-3-Hexen-1-ol+ Hexanal+Nonanal+3-Methylcyclo-hex-2-en-1-ol	hetro+NHV	Female attraction to lure	Female attraction to lure	10.3804	8.48	6	37.4724	22.72	6
488	27	Sullivan et al	2007	USA	Field evaluations of potential aggregation inhibitors for the southern pine beetle, Dendroctonus frontalis (Coleoptera: Curculionidae).	Georgia	South-eastern North America	Dendroctonus frontalis	2002	Frontalin+ α-Pinene+benzaldehyde	guaiacol	NHV	Male attraction to lure	Male attraction to lure	38.435	17.09	9	36.8239	18.99	9
489	27	Sullivan et al	2007	USA	Field evaluations of potential aggregation inhibitors for the southern pine beetle, Dendroctonus frontalis (Coleoptera: Curculionidae).	Georgia	South-eastern North America	Dendroctonus frontalis	2002	Frontalin+ α-Pinene+benzaldehyde	3-Methylcyclo-hex-2-en-1-ol	Hetro	Male attraction to lure	Male attraction to lure	22.9574	8.46	9	36.8239	18.99	9
490	27	Sullivan et al	2007	USA	Field evaluations of potential aggregation inhibitors for the southern pine beetle, Dendroctonus frontalis (Coleoptera: Curculionidae).	Georgia	South-eastern North America	Dendroctonus frontalis	2002	Frontalin+ α-Pinene+benzaldehyde	guaiacol	NHV	Female attraction to lure	Female attraction to lure	39.3556	13.64	9	32.8539	19.51	9
491	27	Sullivan et al	2007	USA	Field evaluations of potential aggregation inhibitors for the southern pine beetle, Dendroctonus frontalis (Coleoptera: Curculionidae).	Georgia	South-eastern North America	Dendroctonus frontalis	2002	Frontalin+ α-Pinene+benzaldehyde	3-Methylcyclo-hex-2-en-1-ol	Hetro	Female attraction to lure	Female attraction to lure	25.7192	10.01	9	32.8539	19.51	9
492	27	Sullivan et al	2007	USA	Field evaluations of potential aggregation inhibitors for the southern pine beetle, Dendroctonus frontalis (Coleoptera: Curculionidae).	Georgia	South-eastern North America	Dendroctonus frontalis	2002	Frontalin+ α-Pinene+benzaldehyde	Verbenone	Vb	Male attraction to lure	Male attraction to lure	20.2801	11.86	13	33.8611	16.69	13
493	27	Sullivan et al	2007	USA	Field evaluations of potential aggregation inhibitors for the southern pine beetle, Dendroctonus frontalis (Coleoptera: Curculionidae).	Georgia	South-eastern North America	Dendroctonus frontalis	2002	Frontalin+ α-Pinene+benzaldehyde	Myrtenal	NHV	Male attraction to lure	Male attraction to lure	21.5591	10.1	13	33.8611	16.69	13
494	27	Sullivan et al	2007	USA	Field evaluations of potential aggregation inhibitors for the southern pine beetle, Dendroctonus frontalis (Coleoptera: Curculionidae).	Georgia	South-eastern North America	Dendroctonus frontalis	2002	Frontalin+ α-Pinene+benzaldehyde	Myrtenol	NHV	Male attraction to lure	Male attraction to lure	12.6675	16.91	13	33.8611	16.69	13
495	27	Sullivan et al	2007	USA	Field evaluations of potential aggregation inhibitors for the southern pine beetle, Dendroctonus frontalis (Coleoptera: Curculionidae).	Georgia	South-eastern North America	Dendroctonus frontalis	2002	Frontalin+ α-Pinene+benzaldehyde	2-phenylethanol	Homo	Male attraction to lure	Male attraction to lure	9.74421	9.22	13	33.8611	16.69	13
496	27	Sullivan et al	2007	USA	Field evaluations of potential aggregation inhibitors for the southern pine beetle, Dendroctonus frontalis (Coleoptera: Curculionidae).	Georgia	South-eastern North America	Dendroctonus frontalis	2002	Frontalin+ α-Pinene+benzaldehyde	Verbenone	Vb	Female attraction to lure	Female attraction to lure	25.8182	20.54	13	29.0909	24.04	13
497	27	Sullivan et al	2007	USA	Field evaluations of potential aggregation inhibitors for the southern pine beetle, Dendroctonus frontalis (Coleoptera: Curculionidae).	Georgia	South-eastern North America	Dendroctonus frontalis	2002	Frontalin+ α-Pinene+benzaldehyde	Myrtenal	NHV	Female attraction to lure	Female attraction to lure	20.0606	15.73	13	29.0909	24.04	13
498	27	Sullivan et al	2007	USA	Field evaluations of potential aggregation inhibitors for the southern pine beetle, Dendroctonus frontalis (Coleoptera: Curculionidae).	Georgia	South-eastern North America	Dendroctonus frontalis	2002	Frontalin+ α-Pinene+benzaldehyde	Myrtenol	NHV	Female attraction to lure	Female attraction to lure	10.1212	18.14	13	29.0909	24.04	13
499	27	Sullivan et al	2007	USA	Field evaluations of potential aggregation inhibitors for the southern pine beetle, Dendroctonus frontalis (Coleoptera: Curculionidae).	Georgia	South-eastern North America	Dendroctonus frontalis	2002	Frontalin+ α-Pinene+benzaldehyde	2-phenylethanol	Homo	Female attraction to lure	Female attraction to lure	4.30303	5.9	13	29.0909	24.04	13
500	27	Sullivan et al	2007	USA	Field evaluations of potential aggregation inhibitors for the southern pine beetle, Dendroctonus frontalis (Coleoptera: Curculionidae).	Georgia	South-eastern North America	Dendroctonus frontalis	2003	Frontalin+ α-Pinene+benzaldehyde	Myrtenol	NHV	Male attraction to lure	Male attraction to lure	29.1743	16.44	7	59.5282	15.81	7
501	27	Sullivan et al	2007	USA	Field evaluations of potential aggregation inhibitors for the southern pine beetle, Dendroctonus frontalis (Coleoptera: Curculionidae).	Georgia	South-eastern North America	Dendroctonus frontalis	2003	Frontalin+ α-Pinene+benzaldehyde	2-phenylethanol	Homo	Male attraction to lure	Male attraction to lure	9.2791	6.43	7	59.5282	15.81	7
502	27	Sullivan et al	2007	USA	Field evaluations of potential aggregation inhibitors for the southern pine beetle, Dendroctonus frontalis (Coleoptera: Curculionidae).	Georgia	South-eastern North America	Dendroctonus frontalis	2003	Frontalin+ α-Pinene+benzaldehyde	Myrtenol+2-phenylethanol	Homo+NHV	Male attraction to lure	Male attraction to lure	2.0445	2.08	7	59.5282	15.81	7
503	27	Sullivan et al	2007	USA	Field evaluations of potential aggregation inhibitors for the southern pine beetle, Dendroctonus frontalis (Coleoptera: Curculionidae).	Georgia	South-eastern North America	Dendroctonus frontalis	2003	Frontalin+ α-Pinene+benzaldehyde	Myrtenol	NHV	Female attraction to lure	Female attraction to lure	22.8422	29.8	7	48.8918	31.87	7
504	27	Sullivan et al	2007	USA	Field evaluations of potential aggregation inhibitors for the southern pine beetle, Dendroctonus frontalis (Coleoptera: Curculionidae).	Georgia	South-eastern North America	Dendroctonus frontalis	2003	Frontalin+ α-Pinene+benzaldehyde	2-phenylethanol	Homo	Female attraction to lure	Female attraction to lure	9.15254	44.91	7	48.8918	31.87	7
505	27	Sullivan et al	2007	USA	Field evaluations of potential aggregation inhibitors for the southern pine beetle, Dendroctonus frontalis (Coleoptera: Curculionidae).	Georgia	South-eastern North America	Dendroctonus frontalis	2003	Frontalin+ α-Pinene+benzaldehyde	Myrtenol+2-phenylethanol	Homo+NHV	Female attraction to lure	Female attraction to lure	9.15254	28.63	7	48.8918	31.87	7
506	28	Graves et al	2008	USA	Protection of spruce from colonization by the bark beetle, Ips perturbatus, in Alaska.	Alaska	North-western North America	Ips perturbatus	2004	ipsenol, cis-verbenol, and ipsdienol	verbenone + trans-conophthorin	Vb+NHV	Tree attack	Tree attack	0.4	0.7	10	11.03	4.11	10
507	28	Graves et al	2008	USA	Protection of spruce from colonization by the bark beetle, Ips perturbatus, in Alaska.	Alaska	North-western North America	Ips perturbatus	2005	ipsenol, cis-verbenol, and ipsdienol	verbenone + trans-conophthorin	Vb+NHV	Tree attack	Tree attack	0.0200429	0.1	10	4.5899	3.71	10
508	29	Fettig et al	2009	California	Efficacy of verbenone for protecting ponderosa pine stands from western pine beetle (Coleoptera: Curculionidae: Scolytinae) attack in California.	California	South-western North America	Dendroctonus brevicomis	2002	(±)-Frontalin + (±)-exo-Brevicomin + Myrcene	verbenone	Vb	Tree killed	Tree killed	5.31959	3.74	6	3.69759	3.57	6
509	29	Fettig et al	2009	California	Efficacy of verbenone for protecting ponderosa pine stands from western pine beetle (Coleoptera: Curculionidae: Scolytinae) attack in California.	California	South-western North America	Dendroctonus brevicomis	2003	(±)-Frontalin + (±)-exo-Brevicomin + Myrcene	verbenone	Vb	Tree killed	Tree killed	1.9244	0.74	6	2.32302	1.25	6
510	29	Fettig et al	2009	California	Efficacy of verbenone for protecting ponderosa pine stands from western pine beetle (Coleoptera: Curculionidae: Scolytinae) attack in California.	California	South-western North America	Dendroctonus brevicomis	2004	(±)-Frontalin + (±)-exo-Brevicomin + Myrcene	verbenone	Vb	Tree killed	Tree killed	4.41237	5.69	6	5.12715	3.47	6
511	29	Fettig et al	2009	California	Efficacy of verbenone for protecting ponderosa pine stands from western pine beetle (Coleoptera: Curculionidae: Scolytinae) attack in California.	California	South-western North America	Dendroctonus brevicomis	2002-04	(±)-Frontalin + (±)-exo-Brevicomin + Myrcene	verbenone	Vb	Tree killed	Tree killed	11.2302	7.14	6	10.7216	5.19	6
512	29	Fettig et al	2009	California	Efficacy of verbenone for protecting ponderosa pine stands from western pine beetle (Coleoptera: Curculionidae: Scolytinae) attack in California.	California	South-western North America	Dendroctonus brevicomis	2002	(±)-Frontalin + (±)-exo-Brevicomin + Myrcene	verbenone	Vb	Tree attack	Tree attack	0.298246	0.34	6	0.280702	0.37	6
513	29	Fettig et al	2009	California	Efficacy of verbenone for protecting ponderosa pine stands from western pine beetle (Coleoptera: Curculionidae: Scolytinae) attack in California.	California	South-western North America	Dendroctonus brevicomis	2003	(±)-Frontalin + (±)-exo-Brevicomin + Myrcene	verbenone	Vb	Tree attack	Tree attack	0.642105	0.7	6	0.540351	0.46	6
514	29	Fettig et al	2009	California	Efficacy of verbenone for protecting ponderosa pine stands from western pine beetle (Coleoptera: Curculionidae: Scolytinae) attack in California.	California	South-western North America	Dendroctonus brevicomis	2004	(±)-Frontalin + (±)-exo-Brevicomin + Myrcene	verbenone	Vb	Tree attack	Tree attack	1.72982	2.04	6	0.708772	0.65	6
515	29	Fettig et al	2009	California	Efficacy of verbenone for protecting ponderosa pine stands from western pine beetle (Coleoptera: Curculionidae: Scolytinae) attack in California.	California	South-western North America	Dendroctonus brevicomis	2002-04	(±)-Frontalin + (±)-exo-Brevicomin + Myrcene	verbenone	Vb	Tree attack	Tree attack	2.47368	2.43	6	1.49123	0.84	6
516	29	Fettig et al	2009	California	Efficacy of verbenone for protecting ponderosa pine stands from western pine beetle (Coleoptera: Curculionidae: Scolytinae) attack in California.	California	South-western North America	Dendroctonus brevicomis	2006	(±)-Frontalin + (±)-exo-Brevicomin + Myrcene	verbenone	Vb	Attraction to lure	Attraction to lure	16.3	10.61	50	43.5	45.25	50
517	29	Fettig et al	2009	California	Efficacy of verbenone for protecting ponderosa pine stands from western pine beetle (Coleoptera: Curculionidae: Scolytinae) attack in California.	California	South-western North America	Dendroctonus brevicomis	2006	(±)-Frontalin + (±)-exo-Brevicomin + Myrcene	verbenone	Vb	Attraction to lure	Attraction to lure	18.7	11.31	50	43.5	45.25	50
518	29	Fettig et al	2009	California	Efficacy of verbenone for protecting ponderosa pine stands from western pine beetle (Coleoptera: Curculionidae: Scolytinae) attack in California.	California	South-western North America	Dendroctonus brevicomis	2006	(±)-Frontalin + (±)-exo-Brevicomin + Myrcene	verbenone	Vb	Attraction to lure	Attraction to lure	21.2	13.44	50	43.5	45.25	50
519	29	Fettig et al	2009	California	Efficacy of verbenone for protecting ponderosa pine stands from western pine beetle (Coleoptera: Curculionidae: Scolytinae) attack in California.	California	South-western North America	Dendroctonus brevicomis	2006	(±)-Frontalin + (±)-exo-Brevicomin + Myrcene	verbenone	Vb	Attraction to lure	Attraction to lure	31.4	28.28	50	43.5	45.25	50
520	30	Gillette et al	2009	United States	Aerially applied verbenone-releasing laminated flakes protect Pinus contorta stands from attack by Dendroctonus ponderosae in California and Idaho.	California	South-western North America	Dendroctonus ponderosae	2005	aggregation pheromone	Verbenone	Vb	Tree attack	Tree attack	1.6	1.57	5	5.1	3.58	5
521	30	Gillette et al	2009	United States	Aerially applied verbenone-releasing laminated flakes protect Pinus contorta stands from attack by Dendroctonus ponderosae in California and Idaho.	Idaho	Central western North America	Dendroctonus ponderosae	2005	aggregation pheromone	Verbenone	Vb	Tree attack	Tree attack	1.6	7.03	5	4.6	4.25	5
522	30	Gillette et al	2009	United States	Aerially applied verbenone-releasing laminated flakes protect Pinus contorta stands from attack by Dendroctonus ponderosae in California and Idaho.	California	South-western North America	Dendroctonus ponderosae	2005	aggregation pheromone	Verbenone	Vb	Attraction to lure	Attraction to lure	16.2168	15.58	5	17.6106	17.12	5
523	30	Gillette et al	2009	United States	Aerially applied verbenone-releasing laminated flakes protect Pinus contorta stands from attack by Dendroctonus ponderosae in California and Idaho.	California	South-western North America	Dendroctonus ponderosae	2005	aggregation pheromone	Verbenone	Vb	Attraction to lure	Attraction to lure	5.70796	6.88	5	4.57965	2.03	5
524	30	Gillette et al	2009	United States	Aerially applied verbenone-releasing laminated flakes protect Pinus contorta stands from attack by Dendroctonus ponderosae in California and Idaho.	Idaho	Central western North America	Dendroctonus ponderosae	2005	aggregation pheromone	Verbenone	Vb	Attraction to lure	Attraction to lure	191.639	96.47	5	209.95	113.3	5
525	30	Gillette et al	2009	United States	Aerially applied verbenone-releasing laminated flakes protect Pinus contorta stands from attack by Dendroctonus ponderosae in California and Idaho.	Idaho	Central western North America	Dendroctonus ponderosae	2005	aggregation pheromone	Verbenone	Vb	Attraction to lure	Attraction to lure	89.0468	33.09	5	82.5251	47.68	5
526	30	Gillette et al	2009	United States	Aerially applied verbenone-releasing laminated flakes protect Pinus contorta stands from attack by Dendroctonus ponderosae in California and Idaho.	Idaho	Central western North America	Dendroctonus ponderosae	2005	aggregation pheromone	Verbenone	Vb	Attraction to lure	Attraction to lure	26.5886	23.56	5	61.7057	23.56	5
527	31	Zhang et al	2009	China	Electrophysiological and behavioral responses of Dendroctonus valens (coleoptera: curculionidae: scolytinae) to four bark beetle pheromones.	China	East Asia	Dendroctonus valens	2006	(+)-3-carene	frontalin	Homo	Attraction to lure	Attraction to lure	7.52368	5.16	7	24.8444	16.04	7
528	31	Zhang et al	2009	China	Electrophysiological and behavioral responses of Dendroctonus valens (coleoptera: curculionidae: scolytinae) to four bark beetle pheromones.	China	East Asia	Dendroctonus valens	2006	(+)-3-carene	exo-brevicomin	Hetro	Attraction to lure	Attraction to lure	15.9134	14.61	7	24.8444	16.04	7
529	31	Zhang et al	2009	China	Electrophysiological and behavioral responses of Dendroctonus valens (coleoptera: curculionidae: scolytinae) to four bark beetle pheromones.	China	East Asia	Dendroctonus valens	2006	(+)-3-carene	cis-verbenol_x0002_	Homo	Attraction to lure	Attraction to lure	13.9648	15.18	7	24.8444	16.04	7
530	31	Zhang et al	2009	China	Electrophysiological and behavioral responses of Dendroctonus valens (coleoptera: curculionidae: scolytinae) to four bark beetle pheromones.	China	East Asia	Dendroctonus valens	2006	(+)-3-carene	trans-verbenol	Homo	Attraction to lure	Attraction to lure	26.4141	13.18	7	24.8444	16.04	7
531	31	Zhang et al	2009	China	Electrophysiological and behavioral responses of Dendroctonus valens (coleoptera: curculionidae: scolytinae) to four bark beetle pheromones.	China	East Asia	Dendroctonus valens	2006	(+)-3-carene	frontalin+exo-brevicomin+trans-verbenol	Homo+Hetro	Attraction to lure	Attraction to lure	8.01083	7.73	7	24.8444	16.04	7
532	31	Zhang et al	2009	China	Electrophysiological and behavioral responses of Dendroctonus valens (coleoptera: curculionidae: scolytinae) to four bark beetle pheromones.	China	East Asia	Dendroctonus valens	2007	(+)-3-carene	frontalin	Homo	Attraction to lure	Attraction to lure	1.4295	1.39	5	3.18538	1.9	5
533	31	Zhang et al	2009	China	Electrophysiological and behavioral responses of Dendroctonus valens (coleoptera: curculionidae: scolytinae) to four bark beetle pheromones.	China	East Asia	Dendroctonus valens	2007	(+)-3-carene	exo-brevicomin	Hetro	Attraction to lure	Attraction to lure	1.86684	3.15	5	3.18538	1.9	5
534	31	Zhang et al	2009	China	Electrophysiological and behavioral responses of Dendroctonus valens (coleoptera: curculionidae: scolytinae) to four bark beetle pheromones.	China	East Asia	Dendroctonus valens	2007	(+)-3-carene	cis-verbenol_x0002_	Homo	Attraction to lure	Attraction to lure	1.57963	1.26	5	3.18538	1.9	5
535	31	Zhang et al	2009	China	Electrophysiological and behavioral responses of Dendroctonus valens (coleoptera: curculionidae: scolytinae) to four bark beetle pheromones.	China	East Asia	Dendroctonus valens	2007	(+)-3-carene	trans-verbenol	Homo	Attraction to lure	Attraction to lure	1.14883	1.88	5	3.18538	1.9	5
536	31	Zhang et al	2009	China	Electrophysiological and behavioral responses of Dendroctonus valens (coleoptera: curculionidae: scolytinae) to four bark beetle pheromones.	China	East Asia	Dendroctonus valens	2007	(+)-3-carene	frontalin+exo-brevicomin+trans-verbenol	Homo+Hetro	Attraction to lure	Attraction to lure	1.4295	1.11	5	3.18538	1.9	5
537	32	Zhang et al	2009	USA	Aggregation pheromone of a newly described spruce bark beetle, Ips shangrila Cognato and Sun, from China.	China	East Asia	Ips shangrila	2009	2-Methy-3-buten-2-ol,(+)-Ipsdienol,cis-Verbenol	trans-Verbenol	Homo	Attraction to lure	Attraction to lure	0.392065	0.52	3	11.0338	8.67	3
538	32	Zhang et al	2009	USA	Aggregation pheromone of a newly described spruce bark beetle, Ips shangrila Cognato and Sun, from China.	China	East Asia	Ips shangrila	2009	2-Methy-3-buten-2-ol,(±)-Ipsdienol,cis-Verbenol	trans-Verbenol	Homo	Attraction to lure	Attraction to lure	0.392065	0.52	3	5.3769	5.69	3
539	32	Zhang et al	2009	USA	Aggregation pheromone of a newly described spruce bark beetle, Ips shangrila Cognato and Sun, from China.	China	East Asia	Ips shangrila	2009	2-Methy-3-buten-2-ol,(+)-Ipsdienol,cis-Verbenol	Ipsdienol	Homo	Attraction to lure	Attraction to lure	5.3769	5.69	3	11.0338	8.67	3
540	32	Zhang et al	2009	USA	Aggregation pheromone of a newly described spruce bark beetle, Ips shangrila Cognato and Sun, from China.	China	East Asia	Ips shangrila	2009	2-Methy-3-buten-2-ol,(+)-Ipsdienol,trans-Verbenol	cis-Verbenol	Homo	Attraction to lure	Attraction to lure	0.392065	0.52	3	3.0245	5.21	3
541	32	Zhang et al	2009	USA	Aggregation pheromone of a newly described spruce bark beetle, Ips shangrila Cognato and Sun, from China.	China	East Asia	Ips shangrila	2009	2-Methy-3-buten-2-ol,(±)-Ipsdienol	cis-Verbenol,trans-Verbenol	Homo	Attraction to lure	Attraction to lure	0.392065	0.52	3	1.69895	2.1	3
542	33	Andersson et al	2010	Sweden	Peripheral modulation of pheromone response by inhibitory host compound in a beetle.	Slovakia	Eastern Europe	Ips typographus	2004	commercial pheromone	1,8-cineole	Host Repellent	Attraction to lure	Attraction to lure	469.525	45.55	6	3412.19	2277.42	6
543	33	Andersson et al	2010	Sweden	Peripheral modulation of pheromone response by inhibitory host compound in a beetle.	Slovakia	Eastern Europe	Ips typographus	2004	commercial pheromone	p-cymene	Host Repellent	Attraction to lure	Attraction to lure	1738.64	444.1	6	3412.19	2277.42	6
544	34	Dodds and Miller	2010	US	Test of nonhost angiosperm volatiles and verbenone to protect trap trees for Sirex noctilio (Hymenoptera: Siricidae) from attacks by bark beetles (Coleoptera: Scolytidae) in the northeastern United States.	New York	North-eastern North America	Ips grandicollis	2007	ipsenol	conophthorin	NHV	Attraction to lure	Attraction to lure	28.6	20.8	5	34.1	24.82	5
545	34	Dodds and Miller	2010	US	Test of nonhost angiosperm volatiles and verbenone to protect trap trees for Sirex noctilio (Hymenoptera: Siricidae) from attacks by bark beetles (Coleoptera: Scolytidae) in the northeastern United States.	New York	North-eastern North America	Ips grandicollis	2007	ipsenol	1-hexanol and (Z)-3-hexenol	NHV	Attraction to lure	Attraction to lure	33.8	24.6	5	34.1	24.82	5
546	34	Dodds and Miller	2010	US	Test of nonhost angiosperm volatiles and verbenone to protect trap trees for Sirex noctilio (Hymenoptera: Siricidae) from attacks by bark beetles (Coleoptera: Scolytidae) in the northeastern United States.	New York	North-eastern North America	Ips grandicollis	2007	ipsenol	verbenone	Vb	Attraction to lure	Attraction to lure	81.6	58.14	5	34.1	24.82	5
547	35	Andersson et al	2011	Sweden	Attraction Modulated by Spacing of Pheromone Components and Anti-attractants in a Bark Beetle and a Moth.	Sweden	Scandinavia	Ips typographus	2008	cis-verbenol (cV) and 2-methyl-3-buten-2-ol (MB)	(trans-conophthorin, 3-octanol, 1-octen-3-ol, 1-hexanol, 1,8-cineole, and verbenone	Vb+NHV	Attraction to lure	Attraction to lure	0.0541632	0.02	16	0.271825	0.09	16
548	35	Andersson et al	2011	Sweden	Attraction Modulated by Spacing of Pheromone Components and Anti-attractants in a Bark Beetle and a Moth.	Sweden	Scandinavia	Ips typographus	2008	cis-verbenol (cV) and 2-methyl-3-buten-2-ol (MB)	(trans-conophthorin, 3-octanol, 1-octen-3-ol, 1-hexanol, 1,8-cineole, and verbenone	Vb+NHV	Attraction to lure	Attraction to lure	0.0861228	0.02	16	0.271825	0.09	16
549	35	Andersson et al	2011	Sweden	Attraction Modulated by Spacing of Pheromone Components and Anti-attractants in a Bark Beetle and a Moth.	Sweden	Scandinavia	Ips typographus	2008	cis-verbenol (cV) and 2-methyl-3-buten-2-ol (MB)	(trans-conophthorin, 3-octanol, 1-octen-3-ol, 1-hexanol, 1,8-cineole, and verbenone	Vb+NHV	Attraction to lure	Attraction to lure	0.110345	0.02	16	0.271825	0.09	16
550	35	Andersson et al	2011	Sweden	Attraction Modulated by Spacing of Pheromone Components and Anti-attractants in a Bark Beetle and a Moth.	Sweden	Scandinavia	Ips typographus	2008	cis-verbenol (cV) and 2-methyl-3-buten-2-ol (MB)	(trans-conophthorin, 3-octanol, 1-octen-3-ol, 1-hexanol, 1,8-cineole, and verbenone	Vb+NHV	Attraction to lure	Attraction to lure	0.173591	0.05	16	0.271825	0.09	16
551	35	Andersson et al	2011	Sweden	Attraction Modulated by Spacing of Pheromone Components and Anti-attractants in a Bark Beetle and a Moth.	Sweden	Scandinavia	Ips typographus	2008	cis-verbenol (cV) and 2-methyl-3-buten-2-ol (MB)	(trans-conophthorin, 3-octanol, 1-octen-3-ol, 1-hexanol, 1,8-cineole, and verbenone	Vb+NHV	Attraction to lure	Attraction to lure	0.174601	0.05	16	0.271825	0.09	16
552	35	Andersson et al	2011	Sweden	Attraction Modulated by Spacing of Pheromone Components and Anti-attractants in a Bark Beetle and a Moth.	Sweden	Scandinavia	Ips typographus	2008	cis-verbenol (cV) and 2-methyl-3-buten-2-ol (MB)	(trans-conophthorin, 3-octanol, 1-octen-3-ol, 1-hexanol, 1,8-cineole, and verbenone	Vb+NHV	Attraction to lure	Attraction to lure	0.163162	0.05	16	0.271825	0.09	16
553	35	Andersson et al	2011	Sweden	Attraction Modulated by Spacing of Pheromone Components and Anti-attractants in a Bark Beetle and a Moth.	Sweden	Scandinavia	Ips typographus	2008	cis-verbenol (cV) and 2-methyl-3-buten-2-ol (MB)	(trans-conophthorin, 3-octanol, 1-octen-3-ol, 1-hexanol, 1,8-cineole, and verbenone	Vb+NHV	Attraction to lure	Attraction to lure	0.0554913	0.02	14	0.238921	0.09	14
554	35	Andersson et al	2011	Sweden	Attraction Modulated by Spacing of Pheromone Components and Anti-attractants in a Bark Beetle and a Moth.	Sweden	Scandinavia	Ips typographus	2008	cis-verbenol (cV) and 2-methyl-3-buten-2-ol (MB)	(trans-conophthorin, 3-octanol, 1-octen-3-ol, 1-hexanol, 1,8-cineole, and verbenone	Vb+NHV	Attraction to lure	Attraction to lure	0.142582	0.06	14	0.238921	0.09	14
555	35	Andersson et al	2011	Sweden	Attraction Modulated by Spacing of Pheromone Components and Anti-attractants in a Bark Beetle and a Moth.	Sweden	Scandinavia	Ips typographus	2008	cis-verbenol (cV) and 2-methyl-3-buten-2-ol (MB)	(trans-conophthorin, 3-octanol, 1-octen-3-ol, 1-hexanol, 1,8-cineole, and verbenone	Vb+NHV	Attraction to lure	Attraction to lure	0.185356	0.07	14	0.238921	0.09	14
556	35	Andersson et al	2011	Sweden	Attraction Modulated by Spacing of Pheromone Components and Anti-attractants in a Bark Beetle and a Moth.	Sweden	Scandinavia	Ips typographus	2008	cis-verbenol (cV) and 2-methyl-3-buten-2-ol (MB)	(trans-conophthorin, 3-octanol, 1-octen-3-ol, 1-hexanol, 1,8-cineole, and verbenone	Vb+NHV	Attraction to lure	Attraction to lure	0.189981	0.06	14	0.238921	0.09	14
557	35	Andersson et al	2011	Sweden	Attraction Modulated by Spacing of Pheromone Components and Anti-attractants in a Bark Beetle and a Moth.	Sweden	Scandinavia	Ips typographus	2008	cis-verbenol (cV) and 2-methyl-3-buten-2-ol (MB)	(trans-conophthorin, 3-octanol, 1-octen-3-ol, 1-hexanol, 1,8-cineole, and verbenone	Vb+NHV	Attraction to lure	Attraction to lure	0.225048	0.09	14	0.238921	0.09	14
558	35	Andersson et al	2011	Sweden	Attraction Modulated by Spacing of Pheromone Components and Anti-attractants in a Bark Beetle and a Moth.	Sweden	Scandinavia	Ips typographus	2009	cis-verbenol (cV) and 2-methyl-3-buten-2-ol (MB)	(trans-conophthorin, 3-octanol, 1-octen-3-ol, 1-hexanol, and verbenone	Vb+NHV	Attraction to lure	Attraction to lure	0.236515	0.06	10	0.589167	0.1	10
559	35	Andersson et al	2011	Sweden	Attraction Modulated by Spacing of Pheromone Components and Anti-attractants in a Bark Beetle and a Moth.	Sweden	Scandinavia	Ips typographus	2009	cis-verbenol (cV) and 2-methyl-3-buten-2-ol (MB)	(trans-conophthorin, 3-octanol, 1-octen-3-ol, 1-hexanol, and verbenone	Vb+NHV	Attraction to lure	Attraction to lure	0.294848	0.16	10	0.497955	0.1	10
560	35	Andersson et al	2011	Sweden	Attraction Modulated by Spacing of Pheromone Components and Anti-attractants in a Bark Beetle and a Moth.	Sweden	Scandinavia	Ips typographus	2009	cis-verbenol (cV) and 2-methyl-3-buten-2-ol (MB)	(trans-conophthorin, 3-octanol, 1-octen-3-ol, 1-hexanol, and verbenone	Vb+NHV	Attraction to lure	Attraction to lure	0.318759	0.06	10	0.400303	0.12	10
561	35	Andersson et al	2011	Sweden	Attraction Modulated by Spacing of Pheromone Components and Anti-attractants in a Bark Beetle and a Moth.	Sweden	Scandinavia	Ips typographus	2009	cis-verbenol (cV) and 2-methyl-3-buten-2-ol (MB)	(trans-conophthorin, 3-octanol, 1-octen-3-ol, 1-hexanol, and verbenone	Vb+NHV	Attraction to lure	Attraction to lure	0.206818	0.16	10	0.589167	0.1	10
562	35	Andersson et al	2011	Sweden	Attraction Modulated by Spacing of Pheromone Components and Anti-attractants in a Bark Beetle and a Moth.	Sweden	Scandinavia	Ips typographus	2009	cis-verbenol (cV) and 2-methyl-3-buten-2-ol (MB)	(trans-conophthorin, 3-octanol, 1-octen-3-ol, 1-hexanol, and verbenone	Vb+NHV	Attraction to lure	Attraction to lure	0.238636	0.06	10	0.497955	0.1	10
563	35	Andersson et al	2011	Sweden	Attraction Modulated by Spacing of Pheromone Components and Anti-attractants in a Bark Beetle and a Moth.	Sweden	Scandinavia	Ips typographus	2009	cis-verbenol (cV) and 2-methyl-3-buten-2-ol (MB)	(trans-conophthorin, 3-octanol, 1-octen-3-ol, 1-hexanol, and verbenone	Vb+NHV	Attraction to lure	Attraction to lure	0.303404	0.08	10	0.400303	0.12	10
564	35	Andersson et al	2011	Sweden	Attraction Modulated by Spacing of Pheromone Components and Anti-attractants in a Bark Beetle and a Moth.	Sweden	Scandinavia	Ips typographus	2009	cis-verbenol (cV) and 2-methyl-3-buten-2-ol (MB)	1-hexanol+ trans-conophthorin + verbenone	Vb+NHV	Attraction to lure	Attraction to lure	0.22634	0.13	10	0.544868	0.17	10
565	35	Andersson et al	2011	Sweden	Attraction Modulated by Spacing of Pheromone Components and Anti-attractants in a Bark Beetle and a Moth.	Sweden	Scandinavia	Ips typographus	2009	cis-verbenol (cV) and 2-methyl-3-buten-2-ol (MB)	1-hexanol+ trans-conophthorin + verbenone	Vb+NHV	Attraction to lure	Attraction to lure	0.321708	0.12	10	0.504178	0.15	10
566	35	Andersson et al	2011	Sweden	Attraction Modulated by Spacing of Pheromone Components and Anti-attractants in a Bark Beetle and a Moth.	Sweden	Scandinavia	Ips typographus	2009	cis-verbenol (cV) and 2-methyl-3-buten-2-ol (MB)	(trans-conophthorin, 3-octanol, 1-octen-3-ol, 1-hexanol, and verbenone	Vb+NHV	Attraction to lure	Attraction to lure	0.23842	0.08	10	0.544868	0.17	10
567	35	Andersson et al	2011	Sweden	Attraction Modulated by Spacing of Pheromone Components and Anti-attractants in a Bark Beetle and a Moth.	Sweden	Scandinavia	Ips typographus	2009	cis-verbenol (cV) and 2-methyl-3-buten-2-ol (MB)	(trans-conophthorin, 3-octanol, 1-octen-3-ol, 1-hexanol, and verbenone	Vb+NHV	Attraction to lure	Attraction to lure	0.183742	0.06	10	0.504178	0.15	10
568	36	Etxebeste and Pajares	2011	Spain	Verbenone protects pine trees from colonization by the six-toothed pine bark beetle, Ips sexdentatus Boern. (Col.: Scolytinae)	Spain	Western Europe	Ips sexdentatus	2006	(±)-ipsdienol	trans-Conophthorin	NHV	Attraction to lure	Attraction to lure	138.031	61.8	7	250.193	86.83	7
569	36	Etxebeste and Pajares	2011	Spain	Verbenone protects pine trees from colonization by the six-toothed pine bark beetle, Ips sexdentatus Boern. (Col.: Scolytinae)	Spain	Western Europe	Ips sexdentatus	2006	(±)-ipsdienol	Verbenone	Vb	Attraction to lure	Attraction to lure	68.3398	37.29	7	250.193	86.83	7
570	36	Etxebeste and Pajares	2011	Spain	Verbenone protects pine trees from colonization by the six-toothed pine bark beetle, Ips sexdentatus Boern. (Col.: Scolytinae)	Spain	Western Europe	Ips sexdentatus	2006	(±)-ipsdienol	trans-Conophthorin	NHV	Attraction to lure	Attraction to lure	98.4353	35	7	193.883	50.43	7
571	36	Etxebeste and Pajares	2011	Spain	Verbenone protects pine trees from colonization by the six-toothed pine bark beetle, Ips sexdentatus Boern. (Col.: Scolytinae)	Spain	Western Europe	Ips sexdentatus	2006	(±)-ipsdienol	Verbenone	Vb	Attraction to lure	Attraction to lure	35.9886	12.8	7	193.883	50.43	7
572	36	Etxebeste and Pajares	2011	Spain	Verbenone protects pine trees from colonization by the six-toothed pine bark beetle, Ips sexdentatus Boern. (Col.: Scolytinae)	Spain	Western Europe	Ips sexdentatus	2006	(±)-ipsdienol	verbenone+trans-Conophthorin	Vb+NHV	Attraction to lure	Attraction to lure	20.7681	14.68	7	193.883	50.43	7
573	37	Sullivan et al	2011	USA	Variable responses by southern pine beetle, Dendroctonus frontalis Zimmermann, to the pheromone component endo-brevicomin: influence of enantiomeric composition, release rate, and proximity to infestations.	Mississippi	South-eastern North America	Dendroctonus frontalis	2005	frontalin and pine turpentine	endo-Brevicomin	Homo	Attraction to lure	Attraction to lure	32.9712	23.68	16	23.3866	16.53	16
574	37	Sullivan et al	2011	USA	Variable responses by southern pine beetle, Dendroctonus frontalis Zimmermann, to the pheromone component endo-brevicomin: influence of enantiomeric composition, release rate, and proximity to infestations.	Mississippi	South-eastern North America	Dendroctonus frontalis	2005	frontalin and pine turpentine	endo-Brevicomin	Homo	Attraction to lure	Attraction to lure	23.0032	15.51	16	23.3866	16.53	16
575	37	Sullivan et al	2011	USA	Variable responses by southern pine beetle, Dendroctonus frontalis Zimmermann, to the pheromone component endo-brevicomin: influence of enantiomeric composition, release rate, and proximity to infestations.	Mississippi	South-eastern North America	Dendroctonus frontalis	2005	frontalin and pine turpentine	endo-Brevicomin	Homo	Attraction to lure	Attraction to lure	29.2652	30.33	16	23.3866	16.53	16
576	37	Sullivan et al	2011	USA	Variable responses by southern pine beetle, Dendroctonus frontalis Zimmermann, to the pheromone component endo-brevicomin: influence of enantiomeric composition, release rate, and proximity to infestations.	Mississippi & Georgia	South-eastern North America	Dendroctonus frontalis	2005	frontalin and pine turpentine	endo-Brevicomin	Homo	Attraction to lure	Attraction to lure	22.7476	19.6	16	23.3866	16.53	16
577	37	Sullivan et al	2011	USA	Variable responses by southern pine beetle, Dendroctonus frontalis Zimmermann, to the pheromone component endo-brevicomin: influence of enantiomeric composition, release rate, and proximity to infestations.	Mississippi & Georgia	South-eastern North America	Dendroctonus frontalis	2005	frontalin and pine turpentine	endo-Brevicomin	Homo	Attraction to lure	Attraction to lure	19.9787	23.34	16	23.3866	16.53	16
578	37	Sullivan et al	2011	USA	Variable responses by southern pine beetle, Dendroctonus frontalis Zimmermann, to the pheromone component endo-brevicomin: influence of enantiomeric composition, release rate, and proximity to infestations.	Mississippi & Georgia	South-eastern North America	Dendroctonus frontalis	2005	frontalin and pine turpentine	endo-Brevicomin	Homo	Attraction to lure	Attraction to lure	12.098	7.84	16	23.3866	16.53	16
579	37	Sullivan et al	2011	USA	Variable responses by southern pine beetle, Dendroctonus frontalis Zimmermann, to the pheromone component endo-brevicomin: influence of enantiomeric composition, release rate, and proximity to infestations.	Mississippi & Georgia	South-eastern North America	Dendroctonus frontalis	2005	frontalin and pine turpentine	endo-Brevicomin	Homo	Attraction to lure	Attraction to lure	10.8626	8.01	16	23.3866	16.53	16
580	37	Sullivan et al	2011	USA	Variable responses by southern pine beetle, Dendroctonus frontalis Zimmermann, to the pheromone component endo-brevicomin: influence of enantiomeric composition, release rate, and proximity to infestations.	Mississippi & Georgia	South-eastern North America	Dendroctonus frontalis	2005	frontalin and pine turpentine	endo-Brevicomin	Homo	Attraction to lure	Attraction to lure	26.1555	18.06	16	23.3866	16.53	16
581	37	Sullivan et al	2011	USA	Variable responses by southern pine beetle, Dendroctonus frontalis Zimmermann, to the pheromone component endo-brevicomin: influence of enantiomeric composition, release rate, and proximity to infestations.	Mississippi & Georgia	South-eastern North America	Dendroctonus frontalis	2005	frontalin and pine turpentine	endo-Brevicomin	Homo	Attraction to lure	Attraction to lure	27.7316	17.21	16	23.3866	16.53	16
582	37	Sullivan et al	2011	USA	Variable responses by southern pine beetle, Dendroctonus frontalis Zimmermann, to the pheromone component endo-brevicomin: influence of enantiomeric composition, release rate, and proximity to infestations.	Mississippi	South-eastern North America	Dendroctonus frontalis	2007	frontalin and pine turpentine	endo-Brevicomin	Homo	Attraction to lure	Attraction to lure	26.1981	17.21	16	23.3866	16.53	16
583	37	Sullivan et al	2011	USA	Variable responses by southern pine beetle, Dendroctonus frontalis Zimmermann, to the pheromone component endo-brevicomin: influence of enantiomeric composition, release rate, and proximity to infestations.	Mississippi	South-eastern North America	Dendroctonus frontalis	2007	frontalin and pine turpentine	endo-Brevicomin	Homo	Attraction to lure	Attraction to lure	23.0458	18.57	16	23.3866	16.53	16
584	37	Sullivan et al	2011	USA	Variable responses by southern pine beetle, Dendroctonus frontalis Zimmermann, to the pheromone component endo-brevicomin: influence of enantiomeric composition, release rate, and proximity to infestations.	Mississippi	South-eastern North America	Dendroctonus frontalis	2007	frontalin and pine turpentine	endo-Brevicomin	Homo	Attraction to lure	Attraction to lure	13.2481	0.2	16	23.3866	16.53	16
585	37	Sullivan et al	2011	USA	Variable responses by southern pine beetle, Dendroctonus frontalis Zimmermann, to the pheromone component endo-brevicomin: influence of enantiomeric composition, release rate, and proximity to infestations.	Georgia	South-eastern North America	Dendroctonus frontalis	2007	frontalin and pine turpentine	endo-Brevicomin	Homo	Attraction to lure	Attraction to lure	9.88285	19.94	16	23.3866	16.53	16
586	37	Sullivan et al	2011	USA	Variable responses by southern pine beetle, Dendroctonus frontalis Zimmermann, to the pheromone component endo-brevicomin: influence of enantiomeric composition, release rate, and proximity to infestations.	Georgia	South-eastern North America	Dendroctonus frontalis	2007	frontalin and pine turpentine	endo-Brevicomin	Homo	Attraction to lure	Attraction to lure	11.7146	9.37	16	23.3866	16.53	16
587	37	Sullivan et al	2011	USA	Variable responses by southern pine beetle, Dendroctonus frontalis Zimmermann, to the pheromone component endo-brevicomin: influence of enantiomeric composition, release rate, and proximity to infestations.	Georgia	South-eastern North America	Dendroctonus frontalis	2007	frontalin and pine turpentine	endo-Brevicomin	Homo	Attraction to lure	Attraction to lure	52.9	66	16	168	249.2	16
588	37	Sullivan et al	2011	USA	Variable responses by southern pine beetle, Dendroctonus frontalis Zimmermann, to the pheromone component endo-brevicomin: influence of enantiomeric composition, release rate, and proximity to infestations.	Georgia	South-eastern North America	Dendroctonus frontalis	2007	frontalin and pine turpentine	endo-Brevicomin	Homo	Attraction to lure	Attraction to lure	53.8	102	16	15.1	24.4	16
589	37	Sullivan et al	2011	USA	Variable responses by southern pine beetle, Dendroctonus frontalis Zimmermann, to the pheromone component endo-brevicomin: influence of enantiomeric composition, release rate, and proximity to infestations.	Georgia	South-eastern North America	Dendroctonus frontalis	2007	frontalin and pine turpentine	endo-Brevicomin	Homo	Attraction to lure	Attraction to lure	30.4	35.2	16	9.5	22.4	16
590	37	Sullivan et al	2011	USA	Variable responses by southern pine beetle, Dendroctonus frontalis Zimmermann, to the pheromone component endo-brevicomin: influence of enantiomeric composition, release rate, and proximity to infestations.	Georgia	South-eastern North America	Dendroctonus frontalis	2007	frontalin and pine turpentine	endo-Brevicomin	Homo	Attraction to lure	Attraction to lure	67.3	84.29	8	221	307.73	8
591	37	Sullivan et al	2011	USA	Variable responses by southern pine beetle, Dendroctonus frontalis Zimmermann, to the pheromone component endo-brevicomin: influence of enantiomeric composition, release rate, and proximity to infestations.	Georgia	South-eastern North America	Dendroctonus frontalis	2007	frontalin and pine turpentine	endo-Brevicomin	Homo	Attraction to lure	Attraction to lure	97.8	133.22	8	26.3	30.55	8
592	37	Sullivan et al	2011	USA	Variable responses by southern pine beetle, Dendroctonus frontalis Zimmermann, to the pheromone component endo-brevicomin: influence of enantiomeric composition, release rate, and proximity to infestations.	Georgia	South-eastern North America	Dendroctonus frontalis	2007	frontalin and pine turpentine	endo-Brevicomin	Homo	Attraction to lure	Attraction to lure	34.5	46.1	8	17.3	30.55	8
593	37	Sullivan et al	2011	USA	Variable responses by southern pine beetle, Dendroctonus frontalis Zimmermann, to the pheromone component endo-brevicomin: influence of enantiomeric composition, release rate, and proximity to infestations.	Georgia	South-eastern North America	Dendroctonus frontalis	2007	frontalin and pine turpentine	endo-Brevicomin	Homo	Attraction to lure	Attraction to lure	38.5	42.14	8	114.9	178.47	8
594	37	Sullivan et al	2011	USA	Variable responses by southern pine beetle, Dendroctonus frontalis Zimmermann, to the pheromone component endo-brevicomin: influence of enantiomeric composition, release rate, and proximity to infestations.	Georgia	South-eastern North America	Dendroctonus frontalis	2007	frontalin and pine turpentine	endo-Brevicomin	Homo	Attraction to lure	Attraction to lure	9.7	11.6	8	3.9	7.07	8
595	37	Sullivan et al	2011	USA	Variable responses by southern pine beetle, Dendroctonus frontalis Zimmermann, to the pheromone component endo-brevicomin: influence of enantiomeric composition, release rate, and proximity to infestations.	Georgia	South-eastern North America	Dendroctonus frontalis	2007	frontalin and pine turpentine	endo-Brevicomin	Homo	Attraction to lure	Attraction to lure	26.3	21.78	8	1.6	1.13	8
596	38	Miller and Allison	2011	U.S	Variation in enantiospecific attraction of Ips avulsus (Coleoptera: Curculionidae) to the pheromone ipsdienol in Georgia.	Georgia	South-eastern North America	Ips avulsus	2006	Ipsenol+(±)-ipsdienol	ipsdienol	Homo	Attraction to lure	Attraction to lure	7.96053	3.54	10	43.3553	37.24	10
597	38	Miller and Allison	2011	U.S	Variation in enantiospecific attraction of Ips avulsus (Coleoptera: Curculionidae) to the pheromone ipsdienol in Georgia.	Georgia	South-eastern North America	Ips avulsus	2006	Ipsenol+(±)-ipsdienol	ipsdienol	Homo	Attraction to lure	Attraction to lure	2.17105	2.7	10	43.3553	37.24	10
598	38	Miller and Allison	2011	U.S	Variation in enantiospecific attraction of Ips avulsus (Coleoptera: Curculionidae) to the pheromone ipsdienol in Georgia.	Georgia	South-eastern North America	Ips grandicollis	2006	Ipsenol+(±)-ipsdienol	ipsdienol	Homo	Attraction to lure	Attraction to lure	29.6209	8.99	10	42.8318	12.55	10
599	38	Miller and Allison	2011	U.S	Variation in enantiospecific attraction of Ips avulsus (Coleoptera: Curculionidae) to the pheromone ipsdienol in Georgia.	Georgia	South-eastern North America	Ips grandicollis	2006	Ipsenol+(±)-ipsdienol	ipsdienol	Homo	Attraction to lure	Attraction to lure	32.4052	8.24	10	42.8318	12.55	10
600	38	Miller and Allison	2011	U.S	Variation in enantiospecific attraction of Ips avulsus (Coleoptera: Curculionidae) to the pheromone ipsdienol in Georgia.	Georgia	South-eastern North America	Ips avulsus	2006	α-pinene+(±)-ipsdienol+lanierone	ipsdienol	Homo	Attraction to lure	Attraction to lure	17.0352	20.72	10	617.854	234.13	10
601	38	Miller and Allison	2011	U.S	Variation in enantiospecific attraction of Ips avulsus (Coleoptera: Curculionidae) to the pheromone ipsdienol in Georgia.	Georgia	South-eastern North America	Ips avulsus	2006	α-pinene+(±)-ipsdienol+lanierone	ipsdienol	Homo	Attraction to lure	Attraction to lure	361.016	182.33	10	617.854	234.13	10
602	38	Miller and Allison	2011	U.S	Variation in enantiospecific attraction of Ips avulsus (Coleoptera: Curculionidae) to the pheromone ipsdienol in Georgia.	Georgia	South-eastern North America	Ips avulsus	2006	ipsenol+lanierone+α-pinene+(±)-ipsdienol	ipsdienol	Homo	Attraction to lure	Attraction to lure	26.2774	44.32	10	1019.56	337.93	10
603	38	Miller and Allison	2011	U.S	Variation in enantiospecific attraction of Ips avulsus (Coleoptera: Curculionidae) to the pheromone ipsdienol in Georgia.	Georgia	South-eastern North America	Ips avulsus	2006	ipsenol+lanierone+α-pinene+(±)-ipsdienol	ipsdienol	Homo	Attraction to lure	Attraction to lure	1203.5	276.99	10	1019.56	337.93	10
604	38	Miller and Allison	2011	U.S	Variation in enantiospecific attraction of Ips avulsus (Coleoptera: Curculionidae) to the pheromone ipsdienol in Georgia.	Georgia	South-eastern North America	Ips grandicollis	2006	ipsenol+lanierone+α-pinene+(±)-ipsdienol	ipsdienol	Homo	Attraction to lure	Attraction to lure	1.80976	2.3	10	3.22153	1.97	10
605	38	Miller and Allison	2011	U.S	Variation in enantiospecific attraction of Ips avulsus (Coleoptera: Curculionidae) to the pheromone ipsdienol in Georgia.	Georgia	South-eastern North America	Ips grandicollis	2006	ipsenol+lanierone+α-pinene+(±)-ipsdienol	ipsdienol	Homo	Attraction to lure	Attraction to lure	1.41927	1	10	3.22153	1.97	10
606	39	Fettig et al	2012	California	Responses of Dendroctonus brevicomis (Coleoptera: Curculionidae) in behavioral assays: Implications to development of a semiochemical-based tool for tree protection.	California	South-western North America	Dendroctonus brevicomis	2006	(±)-frontalin, (±)-exo-brevicomin, myrcene	guaiacol, nonanal, (E)-2-hexenal, (E)-2-hexen-1-ol, (Z)-2-hexen-1-ol, and (-)-verbenone	Vb+NHV	Female attraction to lure	Female attraction to lure	24.2057	28.5	30	64.2663	46.07	30
607	39	Fettig et al	2012	California	Responses of Dendroctonus brevicomis (Coleoptera: Curculionidae) in behavioral assays: Implications to development of a semiochemical-based tool for tree protection.	California	South-western North America	Dendroctonus brevicomis	2006	(±)-frontalin, (±)-exo-brevicomin, myrcene	benzaldehyde (B), benzyl alcohol (BA), guaiacol, nonanal, salicylaldehyde (S), (E)-2-hexenal, (E)-2-hexen-1-ol, (Z)-2-hexen-1-ol, and (-)-verbenone	Vb+NHV	Female attraction to lure	Female attraction to lure	20.5144	19.22	30	64.2663	46.07	30
608	39	Fettig et al	2012	California	Responses of Dendroctonus brevicomis (Coleoptera: Curculionidae) in behavioral assays: Implications to development of a semiochemical-based tool for tree protection.	California	South-western North America	Dendroctonus brevicomis	2006	(±)-frontalin, (±)-exo-brevicomin, myrcene	guaiacol, nonanal, salicylaldehyde (S), (E)-2-hexenal, (E)-2-hexen-1-ol, (Z)-2-hexen-1-ol, and (-)-verbenone	Vb+NHV	Female attraction to lure	Female attraction to lure	20.8169	22.54	30	64.2663	46.07	30
609	39	Fettig et al	2012	California	Responses of Dendroctonus brevicomis (Coleoptera: Curculionidae) in behavioral assays: Implications to development of a semiochemical-based tool for tree protection.	California	South-western North America	Dendroctonus brevicomis	2006	(±)-frontalin, (±)-exo-brevicomin, myrcene	benzyl alcohol (BA), guaiacol, nonanal, (E)-2-hexenal, (E)-2-hexen-1-ol, (Z)-2-hexen-1-ol, and (-)-verbenone	Vb+NHV	Female attraction to lure	Female attraction to lure	20.0303	18.89	30	64.2663	46.07	30
610	39	Fettig et al	2012	California	Responses of Dendroctonus brevicomis (Coleoptera: Curculionidae) in behavioral assays: Implications to development of a semiochemical-based tool for tree protection.	California	South-western North America	Dendroctonus brevicomis	2006	(±)-frontalin, (±)-exo-brevicomin, myrcene	benzaldehyde (B),guaiacol, nonanal, salicylaldehyde (S), (E)-2-hexenal, (E)-2-hexen-1-ol, (Z)-2-hexen-1-ol, and (-)-verbenone	Vb+NHV	Female attraction to lure	Female attraction to lure	17.4281	15.91	30	64.2663	46.07	30
611	39	Fettig et al	2012	California	Responses of Dendroctonus brevicomis (Coleoptera: Curculionidae) in behavioral assays: Implications to development of a semiochemical-based tool for tree protection.	California	South-western North America	Dendroctonus brevicomis	2006	(±)-frontalin, (±)-exo-brevicomin, myrcene	benzyl alcohol (BA), guaiacol, nonanal, salicylaldehyde (S), (E)-2-hexenal, (E)-2-hexen-1-ol, (Z)-2-hexen-1-ol, and (-)-verbenone	Vb+NHV	Female attraction to lure	Female attraction to lure	16.7625	13.26	30	64.2663	46.07	30
612	39	Fettig et al	2012	California	Responses of Dendroctonus brevicomis (Coleoptera: Curculionidae) in behavioral assays: Implications to development of a semiochemical-based tool for tree protection.	California	South-western North America	Dendroctonus brevicomis	2006	(±)-frontalin, (±)-exo-brevicomin, myrcene	benzaldehyde (B),guaiacol, nonanal, (E)-2-hexenal, (E)-2-hexen-1-ol, (Z)-2-hexen-1-ol, and (-)-verbenone	Vb+NHV	Female attraction to lure	Female attraction to lure	12.8896	10.94	30	64.2663	46.07	30
613	39	Fettig et al	2012	California	Responses of Dendroctonus brevicomis (Coleoptera: Curculionidae) in behavioral assays: Implications to development of a semiochemical-based tool for tree protection.	California	South-western North America	Dendroctonus brevicomis	2006	(±)-frontalin, (±)-exo-brevicomin, myrcene	benzaldehyde (B), benzyl alcohol (BA), guaiacol, nonanal, (E)-2-hexenal, (E)-2-hexen-1-ol, (Z)-2-hexen-1-ol, and (-)-verbenone	Vb+NHV	Female attraction to lure	Female attraction to lure	10.469	10.27	30	64.2663	46.07	30
614	39	Fettig et al	2012	California	Responses of Dendroctonus brevicomis (Coleoptera: Curculionidae) in behavioral assays: Implications to development of a semiochemical-based tool for tree protection.	California	South-western North America	Dendroctonus brevicomis	2006	(±)-frontalin, (±)-exo-brevicomin, myrcene	guaiacol, nonanal, (E)-2-hexenal, (E)-2-hexen-1-ol, (Z)-2-hexen-1-ol, and (-)-verbenone	Vb+NHV	Male attraction to lure	Male attraction to lure	13.8508	15.24	30	44.2137	33.79	30
615	39	Fettig et al	2012	California	Responses of Dendroctonus brevicomis (Coleoptera: Curculionidae) in behavioral assays: Implications to development of a semiochemical-based tool for tree protection.	California	South-western North America	Dendroctonus brevicomis	2006	(±)-frontalin, (±)-exo-brevicomin, myrcene	benzaldehyde (B), benzyl alcohol (BA), guaiacol, nonanal, salicylaldehyde (S), (E)-2-hexenal, (E)-2-hexen-1-ol, (Z)-2-hexen-1-ol, and (-)-verbenone	Vb+NHV	Male attraction to lure	Male attraction to lure	10.6452	9.28	30	44.2137	33.79	30
616	39	Fettig et al	2012	California	Responses of Dendroctonus brevicomis (Coleoptera: Curculionidae) in behavioral assays: Implications to development of a semiochemical-based tool for tree protection.	California	South-western North America	Dendroctonus brevicomis	2006	(±)-frontalin, (±)-exo-brevicomin, myrcene	guaiacol, nonanal, salicylaldehyde (S), (E)-2-hexenal, (E)-2-hexen-1-ol, (Z)-2-hexen-1-ol, and (-)-verbenone	Vb+NHV	Male attraction to lure	Male attraction to lure	10.2823	13.91	30	44.2137	33.79	30
617	39	Fettig et al	2012	California	Responses of Dendroctonus brevicomis (Coleoptera: Curculionidae) in behavioral assays: Implications to development of a semiochemical-based tool for tree protection.	California	South-western North America	Dendroctonus brevicomis	2006	(±)-frontalin, (±)-exo-brevicomin, myrcene	benzyl alcohol (BA), guaiacol, nonanal, (E)-2-hexenal, (E)-2-hexen-1-ol, (Z)-2-hexen-1-ol, and (-)-verbenone	Vb+NHV	Male attraction to lure	Male attraction to lure	9.25403	9.61	30	44.2137	33.79	30
618	39	Fettig et al	2012	California	Responses of Dendroctonus brevicomis (Coleoptera: Curculionidae) in behavioral assays: Implications to development of a semiochemical-based tool for tree protection.	California	South-western North America	Dendroctonus brevicomis	2006	(±)-frontalin, (±)-exo-brevicomin, myrcene	benzaldehyde (B),guaiacol, nonanal, salicylaldehyde (S), (E)-2-hexenal, (E)-2-hexen-1-ol, (Z)-2-hexen-1-ol, and (-)-verbenone	Vb+NHV	Male attraction to lure	Male attraction to lure	9.19355	8.94	30	44.2137	33.79	30
619	39	Fettig et al	2012	California	Responses of Dendroctonus brevicomis (Coleoptera: Curculionidae) in behavioral assays: Implications to development of a semiochemical-based tool for tree protection.	California	South-western North America	Dendroctonus brevicomis	2006	(±)-frontalin, (±)-exo-brevicomin, myrcene	benzyl alcohol (BA), guaiacol, nonanal, salicylaldehyde (S), (E)-2-hexenal, (E)-2-hexen-1-ol, (Z)-2-hexen-1-ol, and (-)-verbenone	Vb+NHV	Male attraction to lure	Male attraction to lure	7.92339	7.29	30	44.2137	33.79	30
620	39	Fettig et al	2012	California	Responses of Dendroctonus brevicomis (Coleoptera: Curculionidae) in behavioral assays: Implications to development of a semiochemical-based tool for tree protection.	California	South-western North America	Dendroctonus brevicomis	2006	(±)-frontalin, (±)-exo-brevicomin, myrcene	benzaldehyde (B),guaiacol, nonanal, (E)-2-hexenal, (E)-2-hexen-1-ol, (Z)-2-hexen-1-ol, and (-)-verbenone	Vb+NHV	Male attraction to lure	Male attraction to lure	6.83468	5.63	30	44.2137	33.79	30
621	39	Fettig et al	2012	California	Responses of Dendroctonus brevicomis (Coleoptera: Curculionidae) in behavioral assays: Implications to development of a semiochemical-based tool for tree protection.	California	South-western North America	Dendroctonus brevicomis	2006	(±)-frontalin, (±)-exo-brevicomin, myrcene	benzaldehyde (B), benzyl alcohol (BA), guaiacol, nonanal, (E)-2-hexenal, (E)-2-hexen-1-ol, (Z)-2-hexen-1-ol, and (-)-verbenone	Vb+NHV	Male attraction to lure	Male attraction to lure	6.04839	5.63	30	44.2137	33.79	30
622	39	Fettig et al	2012	California	Responses of Dendroctonus brevicomis (Coleoptera: Curculionidae) in behavioral assays: Implications to development of a semiochemical-based tool for tree protection.	California	South-western North America	Dendroctonus brevicomis	2006	(±)-frontalin, (±)-exo-brevicomin, myrcene	guaiacol (G), nonanal, (E)-2-hexenal, (E)-2-hexen-1-ol, (Z)-2- hexen-1-ol, and (-)-verbenone	Vb+NHV	Female attraction to lure	Female attraction to lure	14.6783	9.65	40	48.6577	29.24	40
623	39	Fettig et al	2012	California	Responses of Dendroctonus brevicomis (Coleoptera: Curculionidae) in behavioral assays: Implications to development of a semiochemical-based tool for tree protection.	California	South-western North America	Dendroctonus brevicomis	2006	(±)-frontalin, (±)-exo-brevicomin, myrcene	nonanal, (E)-2-hexenal, (E)-2-hexen-1-ol, (Z)-2- hexen-1-ol, and (-)-verbenone	Vb+NHV	Female attraction to lure	Female attraction to lure	12.2955	7.54	40	48.6577	29.24	40
624	39	Fettig et al	2012	California	Responses of Dendroctonus brevicomis (Coleoptera: Curculionidae) in behavioral assays: Implications to development of a semiochemical-based tool for tree protection.	California	South-western North America	Dendroctonus brevicomis	2006	(±)-frontalin, (±)-exo-brevicomin, myrcene	guaiacol (G), nonanal, (E)-2-hexenal, (E)-2-hexen-1-ol, (Z)-2- hexen-1-ol, and (-)-verbenone	Vb+NHV	Male attraction to lure	Male attraction to lure	8.18074	4.21	40	33.9596	19.55	40
625	39	Fettig et al	2012	California	Responses of Dendroctonus brevicomis (Coleoptera: Curculionidae) in behavioral assays: Implications to development of a semiochemical-based tool for tree protection.	California	South-western North America	Dendroctonus brevicomis	2006	(±)-frontalin, (±)-exo-brevicomin, myrcene	nonanal, (E)-2-hexenal, (E)-2-hexen-1-ol, (Z)-2- hexen-1-ol, and (-)-verbenone	Vb+NHV	Male attraction to lure	Male attraction to lure	7.13436	4.21	40	33.9596	19.55	40
626	39	Fettig et al	2012	California	Responses of Dendroctonus brevicomis (Coleoptera: Curculionidae) in behavioral assays: Implications to development of a semiochemical-based tool for tree protection.	California	South-western North America	Dendroctonus ponderosae	2006	trans-verbenol, (±)-exo-brevicomin, myrcene	guaiacol (G), nonanal, (E)-2-hexenal, (E)-2-hexen-1-ol, (Z)-2- hexen-1-ol, and (-)-verbenone	Vb+NHV	Female attraction to lure	Female attraction to lure	0.451505	0.84	70	24.3311	27.7	70
627	39	Fettig et al	2012	California	Responses of Dendroctonus brevicomis (Coleoptera: Curculionidae) in behavioral assays: Implications to development of a semiochemical-based tool for tree protection.	California	South-western North America	Dendroctonus ponderosae	2006	trans-verbenol, (±)-exo-brevicomin, myrcene	nonanal, (E)-2-hexenal, (E)-2-hexen-1-ol, (Z)-2- hexen-1-ol, and (-)-verbenone	Vb+NHV	Female attraction to lure	Female attraction to lure	0.476589	0.63	70	24.3311	27.7	70
628	39	Fettig et al	2012	California	Responses of Dendroctonus brevicomis (Coleoptera: Curculionidae) in behavioral assays: Implications to development of a semiochemical-based tool for tree protection.	California	South-western North America	Dendroctonus ponderosae	2006	trans-verbenol, (±)-exo-brevicomin, myrcene	guaiacol (G), nonanal, (E)-2-hexenal, (E)-2-hexen-1-ol, (Z)-2- hexen-1-ol, and (-)-verbenone	Vb+NHV	Male attraction to lure	Male attraction to lure	0.677258	1.05	70	23.2525	21.62	70
629	39	Fettig et al	2012	California	Responses of Dendroctonus brevicomis (Coleoptera: Curculionidae) in behavioral assays: Implications to development of a semiochemical-based tool for tree protection.	California	South-western North America	Dendroctonus ponderosae	2006	trans-verbenol, (±)-exo-brevicomin, myrcene	nonanal, (E)-2-hexenal, (E)-2-hexen-1-ol, (Z)-2- hexen-1-ol, and (-)-verbenone	Vb+NHV	Male attraction to lure	Male attraction to lure	0.602007	0.63	70	23.2525	21.62	70
630	39	Fettig et al	2012	California	Responses of Dendroctonus brevicomis (Coleoptera: Curculionidae) in behavioral assays: Implications to development of a semiochemical-based tool for tree protection.	California	South-western North America	Dendroctonus brevicomis	2007	(±)-frontalin, (±)-exo-brevicomin, myrcene	acetophenone	Homo	Female attraction to lure	Female attraction to lure	60.0976	30.23	40	94.5366	41.34	40
631	39	Fettig et al	2012	California	Responses of Dendroctonus brevicomis (Coleoptera: Curculionidae) in behavioral assays: Implications to development of a semiochemical-based tool for tree protection.	California	South-western North America	Dendroctonus brevicomis	2007	(±)-frontalin, (±)-exo-brevicomin, myrcene	verbenone	Vb	Female attraction to lure	Female attraction to lure	32	19.13	40	94.5366	41.34	40
632	39	Fettig et al	2012	California	Responses of Dendroctonus brevicomis (Coleoptera: Curculionidae) in behavioral assays: Implications to development of a semiochemical-based tool for tree protection.	California	South-western North America	Dendroctonus brevicomis	2007	(±)-frontalin, (±)-exo-brevicomin, myrcene	nonanal, (E)-2-hexenal, (E)-2-hexen-1-ol and (Z)-2-hexen-1-ol and (-)-verbenone	Vb+NHV	Female attraction to lure	Female attraction to lure	29.3659	13.57	40	94.5366	41.34	40
633	39	Fettig et al	2012	California	Responses of Dendroctonus brevicomis (Coleoptera: Curculionidae) in behavioral assays: Implications to development of a semiochemical-based tool for tree protection.	California	South-western North America	Dendroctonus brevicomis	2007	(±)-frontalin, (±)-exo-brevicomin, myrcene	acetophenone +verbenone	Vb+hetro	Female attraction to lure	Female attraction to lure	22.2439	12.96	40	94.5366	41.34	40
634	39	Fettig et al	2012	California	Responses of Dendroctonus brevicomis (Coleoptera: Curculionidae) in behavioral assays: Implications to development of a semiochemical-based tool for tree protection.	California	South-western North America	Dendroctonus brevicomis	2007	(±)-frontalin, (±)-exo-brevicomin, myrcene	acetophenone +nonanal, (E)-2-hexenal, (E)-2-hexen-1-ol and (Z)-2-hexen-1-ol and (-)-verbenone	Vb+homo+NHV	Female attraction to lure	Female attraction to lure	13.0732	7.4	40	94.5366	41.34	40
635	39	Fettig et al	2012	California	Responses of Dendroctonus brevicomis (Coleoptera: Curculionidae) in behavioral assays: Implications to development of a semiochemical-based tool for tree protection.	California	South-western North America	Dendroctonus brevicomis	2007	(±)-frontalin, (±)-exo-brevicomin, myrcene	acetophenone	Homo	Male attraction to lure	Male attraction to lure	45.1852	22.25	40	69.8148	31.62	40
636	39	Fettig et al	2012	California	Responses of Dendroctonus brevicomis (Coleoptera: Curculionidae) in behavioral assays: Implications to development of a semiochemical-based tool for tree protection.	California	South-western North America	Dendroctonus brevicomis	2007	(±)-frontalin, (±)-exo-brevicomin, myrcene	verbenone	Vb	Male attraction to lure	Male attraction to lure	21.7593	14.05	40	69.8148	31.62	40
637	39	Fettig et al	2012	California	Responses of Dendroctonus brevicomis (Coleoptera: Curculionidae) in behavioral assays: Implications to development of a semiochemical-based tool for tree protection.	California	South-western North America	Dendroctonus brevicomis	2007	(±)-frontalin, (±)-exo-brevicomin, myrcene	nonanal, (E)-2-hexenal, (E)-2-hexen-1-ol and (Z)-2-hexen-1-ol and (-)-verbenone	Vb+NHV	Male attraction to lure	Male attraction to lure	18.5185	10.54	40	69.8148	31.62	40
638	39	Fettig et al	2012	California	Responses of Dendroctonus brevicomis (Coleoptera: Curculionidae) in behavioral assays: Implications to development of a semiochemical-based tool for tree protection.	California	South-western North America	Dendroctonus brevicomis	2007	(±)-frontalin, (±)-exo-brevicomin, myrcene	acetophenone +verbenone	Vb+hetro	Male attraction to lure	Male attraction to lure	13.7963	6.44	40	69.8148	31.62	40
639	39	Fettig et al	2012	California	Responses of Dendroctonus brevicomis (Coleoptera: Curculionidae) in behavioral assays: Implications to development of a semiochemical-based tool for tree protection.	California	South-western North America	Dendroctonus brevicomis	2007	(±)-frontalin, (±)-exo-brevicomin, myrcene	acetophenone +nonanal, (E)-2-hexenal, (E)-2-hexen-1-ol and (Z)-2-hexen-1-ol and (-)-verbenone	Vb+homo+NHV	Male attraction to lure	Male attraction to lure	7.77778	4.68	40	69.8148	31.62	40
640	39	Fettig et al	2012	California	Responses of Dendroctonus brevicomis (Coleoptera: Curculionidae) in behavioral assays: Implications to development of a semiochemical-based tool for tree protection.	California	South-western North America	Dendroctonus brevicomis	2007	(±)-frontalin, (±)-exo-brevicomin, myrcene	hexanol +(Z)-3-hexen-1-ol	NHV	Female attraction to lure	Female attraction to lure	30.4502	19.52	40	31.3505	15.05	40
641	39	Fettig et al	2012	California	Responses of Dendroctonus brevicomis (Coleoptera: Curculionidae) in behavioral assays: Implications to development of a semiochemical-based tool for tree protection.	California	South-western North America	Dendroctonus brevicomis	2007	(±)-frontalin, (±)-exo-brevicomin, myrcene	verbenone	Vb	Female attraction to lure	Female attraction to lure	14.1158	10.17	40	31.3505	15.05	40
642	39	Fettig et al	2012	California	Responses of Dendroctonus brevicomis (Coleoptera: Curculionidae) in behavioral assays: Implications to development of a semiochemical-based tool for tree protection.	California	South-western North America	Dendroctonus brevicomis	2007	(±)-frontalin, (±)-exo-brevicomin, myrcene	hexanol +(Z)-3-hexen-1-ol+verbenone	Vb+NHV	Female attraction to lure	Female attraction to lure	10.9646	6.71	40	31.3505	15.05	40
643	39	Fettig et al	2012	California	Responses of Dendroctonus brevicomis (Coleoptera: Curculionidae) in behavioral assays: Implications to development of a semiochemical-based tool for tree protection.	California	South-western North America	Dendroctonus brevicomis	2007	(±)-frontalin, (±)-exo-brevicomin, myrcene	nonanal, (E)-2-hexenal, (E)-2-hexen-1-ol and (Z)-2-hexen-1-ol and (-)-verbenone	Vb+NHV	Female attraction to lure	Female attraction to lure	9.58199	5.29	40	31.3505	15.05	40
644	39	Fettig et al	2012	California	Responses of Dendroctonus brevicomis (Coleoptera: Curculionidae) in behavioral assays: Implications to development of a semiochemical-based tool for tree protection.	California	South-western North America	Dendroctonus brevicomis	2007	(±)-frontalin, (±)-exo-brevicomin, myrcene	hexanol +(Z)-3-hexen-1-ol	NHV	Male attraction to lure	Male attraction to lure	29.4231	15.81	40	33.6538	18.24	40
645	39	Fettig et al	2012	California	Responses of Dendroctonus brevicomis (Coleoptera: Curculionidae) in behavioral assays: Implications to development of a semiochemical-based tool for tree protection.	California	South-western North America	Dendroctonus brevicomis	2007	(±)-frontalin, (±)-exo-brevicomin, myrcene	verbenone	Vb	Male attraction to lure	Male attraction to lure	14.5513	9.93	40	33.6538	18.24	40
646	39	Fettig et al	2012	California	Responses of Dendroctonus brevicomis (Coleoptera: Curculionidae) in behavioral assays: Implications to development of a semiochemical-based tool for tree protection.	California	South-western North America	Dendroctonus brevicomis	2007	(±)-frontalin, (±)-exo-brevicomin, myrcene	hexanol +(Z)-3-hexen-1-ol+verbenone	Vb+NHV	Male attraction to lure	Male attraction to lure	9.35897	5.47	40	33.6538	18.24	40
647	39	Fettig et al	2012	California	Responses of Dendroctonus brevicomis (Coleoptera: Curculionidae) in behavioral assays: Implications to development of a semiochemical-based tool for tree protection.	California	South-western North America	Dendroctonus brevicomis	2007	(±)-frontalin, (±)-exo-brevicomin, myrcene	nonanal, (E)-2-hexenal, (E)-2-hexen-1-ol and (Z)-2-hexen-1-ol and (-)-verbenone	Vb+NHV	Male attraction to lure	Male attraction to lure	7.72436	4.26	40	33.6538	18.24	40
648	39	Fettig et al	2012	California	Responses of Dendroctonus brevicomis (Coleoptera: Curculionidae) in behavioral assays: Implications to development of a semiochemical-based tool for tree protection.	California	South-western North America	Dendroctonus brevicomis	2007	(±)-frontalin, (±)-exo-brevicomin, myrcene	acetophenone	Homo	Female attraction to lure	Female attraction to lure	49.6006	33.41	30	81.772	57.68	30
649	39	Fettig et al	2012	California	Responses of Dendroctonus brevicomis (Coleoptera: Curculionidae) in behavioral assays: Implications to development of a semiochemical-based tool for tree protection.	California	South-western North America	Dendroctonus brevicomis	2007	(±)-frontalin, (±)-exo-brevicomin, myrcene	verbenone	Vb	Female attraction to lure	Female attraction to lure	28.976	21.88	30	81.772	57.68	30
650	39	Fettig et al	2012	California	Responses of Dendroctonus brevicomis (Coleoptera: Curculionidae) in behavioral assays: Implications to development of a semiochemical-based tool for tree protection.	California	South-western North America	Dendroctonus brevicomis	2007	(±)-frontalin, (±)-exo-brevicomin, myrcene	acetophenone +verbenone	Vb+hetro	Female attraction to lure	Female attraction to lure	16.1946	17.5	30	81.772	57.68	30
651	39	Fettig et al	2012	California	Responses of Dendroctonus brevicomis (Coleoptera: Curculionidae) in behavioral assays: Implications to development of a semiochemical-based tool for tree protection.	California	South-western North America	Dendroctonus brevicomis	2007	(±)-frontalin, (±)-exo-brevicomin, myrcene	nonanal, (E)-2-hexenal, (E)-2-hexen-1-ol and (Z)-2-hexen-1-ol and (-)-verbenone	Vb+NHV	Female attraction to lure	Female attraction to lure	14.016	9.15	30	81.772	57.68	30
652	39	Fettig et al	2012	California	Responses of Dendroctonus brevicomis (Coleoptera: Curculionidae) in behavioral assays: Implications to development of a semiochemical-based tool for tree protection.	California	South-western North America	Dendroctonus brevicomis	2007	(±)-frontalin, (±)-exo-brevicomin, myrcene	acetophenone +nonanal, (E)-2-hexenal, (E)-2-hexen-1-ol and (Z)-2-hexen-1-ol and (-)-verbenone	Vb+homo+NHV	Female attraction to lure	Female attraction to lure	10.2397	10.34	30	81.772	57.68	30
653	39	Fettig et al	2012	California	Responses of Dendroctonus brevicomis (Coleoptera: Curculionidae) in behavioral assays: Implications to development of a semiochemical-based tool for tree protection.	California	South-western North America	Dendroctonus brevicomis	2007	(±)-frontalin, (±)-exo-brevicomin, myrcene	acetophenone	Homo	Male attraction to lure	Male attraction to lure	37.92	25.41	30	64.72	51.71	30
654	39	Fettig et al	2012	California	Responses of Dendroctonus brevicomis (Coleoptera: Curculionidae) in behavioral assays: Implications to development of a semiochemical-based tool for tree protection.	California	South-western North America	Dendroctonus brevicomis	2007	(±)-frontalin, (±)-exo-brevicomin, myrcene	verbenone	Vb	Male attraction to lure	Male attraction to lure	19.12	12.71	30	64.72	51.71	30
655	39	Fettig et al	2012	California	Responses of Dendroctonus brevicomis (Coleoptera: Curculionidae) in behavioral assays: Implications to development of a semiochemical-based tool for tree protection.	California	South-western North America	Dendroctonus brevicomis	2007	(±)-frontalin, (±)-exo-brevicomin, myrcene	acetophenone +verbenone	Vb+hetro	Male attraction to lure	Male attraction to lure	10.16	11.39	30	64.72	51.71	30
656	39	Fettig et al	2012	California	Responses of Dendroctonus brevicomis (Coleoptera: Curculionidae) in behavioral assays: Implications to development of a semiochemical-based tool for tree protection.	California	South-western North America	Dendroctonus brevicomis	2007	(±)-frontalin, (±)-exo-brevicomin, myrcene	nonanal, (E)-2-hexenal, (E)-2-hexen-1-ol and (Z)-2-hexen-1-ol and (-)-verbenone	Vb+NHV	Male attraction to lure	Male attraction to lure	9.68	6.57	30	64.72	51.71	30
657	39	Fettig et al	2012	California	Responses of Dendroctonus brevicomis (Coleoptera: Curculionidae) in behavioral assays: Implications to development of a semiochemical-based tool for tree protection.	California	South-western North America	Dendroctonus brevicomis	2007	(±)-frontalin, (±)-exo-brevicomin, myrcene	acetophenone +nonanal, (E)-2-hexenal, (E)-2-hexen-1-ol and (Z)-2-hexen-1-ol and (-)-verbenone	Vb+hetro+NHV	Male attraction to lure	Male attraction to lure	6.64	8.33	30	64.72	51.71	30
658	39	Fettig et al	2012	California	Responses of Dendroctonus brevicomis (Coleoptera: Curculionidae) in behavioral assays: Implications to development of a semiochemical-based tool for tree protection.	California	South-western North America	Dendroctonus brevicomis	2007	(±)-frontalin, (±)-exo-brevicomin, myrcene	hexanol + (Z)-3-hexen-1-ol	NHV	Female attraction to lure	Female attraction to lure	101.111	83.04	30	112.63	92.21	30
659	39	Fettig et al	2012	California	Responses of Dendroctonus brevicomis (Coleoptera: Curculionidae) in behavioral assays: Implications to development of a semiochemical-based tool for tree protection.	California	South-western North America	Dendroctonus brevicomis	2007	(±)-frontalin, (±)-exo-brevicomin, myrcene	verbenone	Vb	Female attraction to lure	Female attraction to lure	72.0675	69.56	30	112.63	92.21	30
660	39	Fettig et al	2012	California	Responses of Dendroctonus brevicomis (Coleoptera: Curculionidae) in behavioral assays: Implications to development of a semiochemical-based tool for tree protection.	California	South-western North America	Dendroctonus brevicomis	2007	(±)-frontalin, (±)-exo-brevicomin, myrcene	verbenone	Vb	Female attraction to lure	Female attraction to lure	46.6667	33.97	30	112.63	92.21	30
661	39	Fettig et al	2012	California	Responses of Dendroctonus brevicomis (Coleoptera: Curculionidae) in behavioral assays: Implications to development of a semiochemical-based tool for tree protection.	California	South-western North America	Dendroctonus brevicomis	2007	(±)-frontalin, (±)-exo-brevicomin, myrcene	nonanal, (E)-2-hexenal, (E)-2-hexen-1-ol and (Z)-2-hexen-1-ol and (-)-verbenone	Vb+NHV	Female attraction to lure	Female attraction to lure	26.1885	18.33	30	112.63	92.21	30
662	39	Fettig et al	2012	California	Responses of Dendroctonus brevicomis (Coleoptera: Curculionidae) in behavioral assays: Implications to development of a semiochemical-based tool for tree protection.	California	South-western North America	Dendroctonus brevicomis	2007	(±)-frontalin, (±)-exo-brevicomin, myrcene	hexanol + (Z)-3-hexen-1-ol	NHV	Male attraction to lure	Male attraction to lure	57.5238	58.95	30	67.5238	50.6	30
663	39	Fettig et al	2012	California	Responses of Dendroctonus brevicomis (Coleoptera: Curculionidae) in behavioral assays: Implications to development of a semiochemical-based tool for tree protection.	California	South-western North America	Dendroctonus brevicomis	2007	(±)-frontalin, (±)-exo-brevicomin, myrcene	verbenone	Vb	Male attraction to lure	Male attraction to lure	35.8095	32.34	30	67.5238	50.6	30
664	39	Fettig et al	2012	California	Responses of Dendroctonus brevicomis (Coleoptera: Curculionidae) in behavioral assays: Implications to development of a semiochemical-based tool for tree protection.	California	South-western North America	Dendroctonus brevicomis	2007	(±)-frontalin, (±)-exo-brevicomin, myrcene	verbenone	Vb	Male attraction to lure	Male attraction to lure	21.8095	13.56	30	67.5238	50.6	30
665	39	Fettig et al	2012	California	Responses of Dendroctonus brevicomis (Coleoptera: Curculionidae) in behavioral assays: Implications to development of a semiochemical-based tool for tree protection.	California	South-western North America	Dendroctonus brevicomis	2007	(±)-frontalin, (±)-exo-brevicomin, myrcene	nonanal, (E)-2-hexenal, (E)-2-hexen-1-ol and (Z)-2-hexen-1-ol and (-)-verbenone	Vb+NHV	Male attraction to lure	Male attraction to lure	12.9524	11.48	30	67.5238	50.6	30
666	39	Fettig et al	2012	California	Responses of Dendroctonus brevicomis (Coleoptera: Curculionidae) in behavioral assays: Implications to development of a semiochemical-based tool for tree protection.	California	South-western North America	Dendroctonus brevicomis	2009	(±)-frontalin, (±)-exo-brevicomin, myrcene	nonanal, (E)-2-hexenal, (E)-2-hexen-1-ol and (Z)-2-hexen-1-ol and (-)-verbenone	Vb+NHV	Female attraction to lure	Female attraction to lure	19.0889	24.05	56	69.4679	106.03	56
667	39	Fettig et al	2012	California	Responses of Dendroctonus brevicomis (Coleoptera: Curculionidae) in behavioral assays: Implications to development of a semiochemical-based tool for tree protection.	California	South-western North America	Dendroctonus brevicomis	2009	(±)-frontalin, (±)-exo-brevicomin, myrcene	acetophenone, (E)-2-hexen-1-ol + (Z)-2-hexen-1-ol, and (-)- verbenone	Vb+hetro+NHV	Female attraction to lure	Female attraction to lure	9.18367	8.35	56	69.4679	106.03	56
668	39	Fettig et al	2012	California	Responses of Dendroctonus brevicomis (Coleoptera: Curculionidae) in behavioral assays: Implications to development of a semiochemical-based tool for tree protection.	California	South-western North America	Dendroctonus brevicomis	2009	(±)-frontalin, (±)-exo-brevicomin, myrcene	(E)-2-hexen-1-ol+(Z)-2-hexen-1-ol	NHV	Female attraction to lure	Female attraction to lure	7.80612	8.84	56	69.4679	106.03	56
669	39	Fettig et al	2012	California	Responses of Dendroctonus brevicomis (Coleoptera: Curculionidae) in behavioral assays: Implications to development of a semiochemical-based tool for tree protection.	California	South-western North America	Dendroctonus brevicomis	2009	(±)-frontalin, (±)-exo-brevicomin, myrcene	nonanal, (E)-2-hexenal, (E)-2-hexen-1-ol and (Z)-2-hexen-1-ol and (-)-verbenone	Vb+NHV	Male attraction to lure	Male attraction to lure	10.4618	13.97	56	46.2582	75.33	56
670	39	Fettig et al	2012	California	Responses of Dendroctonus brevicomis (Coleoptera: Curculionidae) in behavioral assays: Implications to development of a semiochemical-based tool for tree protection.	California	South-western North America	Dendroctonus brevicomis	2009	(±)-frontalin, (±)-exo-brevicomin, myrcene	acetophenone, (E)-2-hexen-1-ol + (Z)-2-hexen-1-ol, and (-)- verbenone	Vb+hetro+NHV	Male attraction to lure	Male attraction to lure	4.86334	3.81	56	46.2582	75.33	56
671	39	Fettig et al	2012	California	Responses of Dendroctonus brevicomis (Coleoptera: Curculionidae) in behavioral assays: Implications to development of a semiochemical-based tool for tree protection.	California	South-western North America	Dendroctonus brevicomis	2009	(±)-frontalin, (±)-exo-brevicomin, myrcene	(E)-2-hexen-1-ol:(Z)-2-hexen-1-ol	NHV	Male attraction to lure	Male attraction to lure	4.75024	5.5	56	46.2582	75.33	56
672	40	Gillette et al	2012	California	The Push–Pull tactic for mitigation of mountain Pine Beetle (Coleoptera: Curculionidae) damage in lodgepole and whitebark pines.	California	South-western North America	Dendroctonus ponderosae	2008	trans-verbenol,exo-brevicomin	Verbenone	Vb	Attraction to lure	Attraction to lure	21.9857	15.38	5	75.4145	79.37	5
673	40	Gillette et al	2012	California	The Push–Pull tactic for mitigation of mountain Pine Beetle (Coleoptera: Curculionidae) damage in lodgepole and whitebark pines.	California	South-western North America	Dendroctonus ponderosae	2008	trans-verbenol,exo-brevicomin	Verbenone	Vb	Attraction to lure	Attraction to lure	18.0553	19.77	5	50.3582	62.62	5
674	40	Gillette et al	2012	California	The Push–Pull tactic for mitigation of mountain Pine Beetle (Coleoptera: Curculionidae) damage in lodgepole and whitebark pines.	California	South-western North America	Dendroctonus ponderosae	2008	trans-verbenol,exo-brevicomin	Verbenone	Vb	Attraction to lure	Attraction to lure	8.59775	6.32	5	17.4411	10.44	5
675	40	Gillette et al	2012	California	The Push–Pull tactic for mitigation of mountain Pine Beetle (Coleoptera: Curculionidae) damage in lodgepole and whitebark pines.	Washington	North-western North America	Dendroctonus ponderosae	2010	trans-verbenol,exo-brevicomin, myrecebe, and terpinolene	Verbenone+1-hexanol and Z-3-hexenol	Vb+NHV	Attraction to lure	Attraction to lure	10.3947	13.56	3	51.0526	10.37	3
676	40	Gillette et al	2012	California	The Push–Pull tactic for mitigation of mountain Pine Beetle (Coleoptera: Curculionidae) damage in lodgepole and whitebark pines.	Washington	North-western North America	Dendroctonus ponderosae	2010	trans-verbenol,exo-brevicomin	Verbenone+1-hexanol and Z-3-hexenol	Vb+NHV	Attraction to lure	Attraction to lure	5.65789	7.29	3	27.7632	11.96	3
677	40	Gillette et al	2012	California	The Push–Pull tactic for mitigation of mountain Pine Beetle (Coleoptera: Curculionidae) damage in lodgepole and whitebark pines.	California	South-western North America	Dendroctonus ponderosae	2008	trans-verbenol,exo-brevicomin	Verbenone	Vb	Attraction to lure	Attraction to lure	70.6905	88.6168	5	185.171	68.9903	5
678	40	Gillette et al	2012	California	The Push–Pull tactic for mitigation of mountain Pine Beetle (Coleoptera: Curculionidae) damage in lodgepole and whitebark pines.	Washington	North-western North America	Dendroctonus ponderosae	2010	trans-verbenol,exo-brevicomin	Verbenone+1-hexanol and Z-3-hexenol	Vb+NHV	Attraction to lure	Attraction to lure	31.7561	6.98338	3	117.951	13.3202	3
679	41	Strom et al	2013	USA	Attractant and disruptant semiochemicals for Dendroctonus jeffreyi (Coleoptera: Curculionidae: Scolytinae).	California	South-western North America	Dendroctonus jeffreyi	2007	n-heptane : heptanol	Verbenone and blend of cis-3-Hexenol and 1-Hexanol	Vb+NHV	Attraction to lure	Attraction to lure	14.4	10.74	12	70.7	51.62	12
680	41	Strom et al	2013	USA	Attractant and disruptant semiochemicals for Dendroctonus jeffreyi (Coleoptera: Curculionidae: Scolytinae).	California	South-western North America	Dendroctonus jeffreyi	2007	n-heptane : heptanol	Verbenone and blend of cis-3-Hexenol and 1-Hexanol	Vb+NHV	Female attraction to lure	Female attraction to lure	35.5	19.05	12	27.7	12.47	12
681	41	Strom et al	2013	USA	Attractant and disruptant semiochemicals for Dendroctonus jeffreyi (Coleoptera: Curculionidae: Scolytinae).	California	South-western North America	Dendroctonus jeffreyi	2008	n-heptane : heptanol	Verbenone	Vb	Attraction to lure	Attraction to lure	98.8	43.83	5	445.4	474.49	5
682	41	Strom et al	2013	USA	Attractant and disruptant semiochemicals for Dendroctonus jeffreyi (Coleoptera: Curculionidae: Scolytinae).	California	South-western North America	Dendroctonus jeffreyi	2008	n-heptane : heptanol	Verbenone and blend of cis-3-Hexenol and 1-Hexanol	Vb+NHV	Attraction to lure	Attraction to lure	102.4	33.09	5	445.4	474.49	5
683	41	Strom et al	2013	USA	Attractant and disruptant semiochemicals for Dendroctonus jeffreyi (Coleoptera: Curculionidae: Scolytinae).	California	South-western North America	Dendroctonus jeffreyi	2008	n-heptane : heptanol	Verbenone, 600-mg frontalin, and blend of cis-3-Hexenol and 1-Hexanol	Vb+homo+NHV	Attraction to lure	Attraction to lure	1.4	2.01	5	445.4	474.49	5
684	41	Strom et al	2013	USA	Attractant and disruptant semiochemicals for Dendroctonus jeffreyi (Coleoptera: Curculionidae: Scolytinae).	California	South-western North America	Dendroctonus jeffreyi	2008	n-heptane : heptanol	Verbenone	Vb	Female attraction to lure	Female attraction to lure	45.3	18.78	5	51	9.84	5
685	41	Strom et al	2013	USA	Attractant and disruptant semiochemicals for Dendroctonus jeffreyi (Coleoptera: Curculionidae: Scolytinae).	California	South-western North America	Dendroctonus jeffreyi	2008	n-heptane : heptanol	Verbenone and blend of cis-3-Hexenol and 1-Hexanol	Vb+NHV	Female attraction to lure	Female attraction to lure	57	6.04	5	51	9.84	5
686	41	Strom et al	2013	USA	Attractant and disruptant semiochemicals for Dendroctonus jeffreyi (Coleoptera: Curculionidae: Scolytinae).	California	South-western North America	Dendroctonus valens	2008	n-heptane : heptanol	Verbenone	Vb	Attraction to lure	Attraction to lure	1	0.67	5	14.6	10.29	5
687	41	Strom et al	2013	USA	Attractant and disruptant semiochemicals for Dendroctonus jeffreyi (Coleoptera: Curculionidae: Scolytinae).	California	South-western North America	Dendroctonus valens	2008	n-heptane : heptanol	Verbenone, 600-mg frontalin, and blend of cis-3-Hexenol and 1-Hexanol	Vb+hetro+NHV	Attraction to lure	Attraction to lure	0.2	0.67	5	14.6	10.29	5
688	41	Strom et al	2013	USA	Attractant and disruptant semiochemicals for Dendroctonus jeffreyi (Coleoptera: Curculionidae: Scolytinae).	California	South-western North America	Dendroctonus jeffreyi	2009	n-heptane : heptanol	frontalin	Homo	Attraction to lure	Attraction to lure	8	6.61	6	168.3	83.04	6
689	41	Strom et al	2013	USA	Attractant and disruptant semiochemicals for Dendroctonus jeffreyi (Coleoptera: Curculionidae: Scolytinae).	California	South-western North America	Dendroctonus jeffreyi	2009	n-heptane : heptanol	frontalin	Homo	Attraction to lure	Attraction to lure	4	4.41	6	168.3	83.04	6
690	41	Strom et al	2013	USA	Attractant and disruptant semiochemicals for Dendroctonus jeffreyi (Coleoptera: Curculionidae: Scolytinae).	California	South-western North America	Dendroctonus jeffreyi	2009	n-heptane : heptanol	Verbenone, 600-mg frontalin, and blend of cis-3-Hexenol and 1-Hexanol	Vb+homo+NHV	Attraction to lure	Attraction to lure	1.7	2.69	6	168.3	83.04	6
691	41	Strom et al	2013	USA	Attractant and disruptant semiochemicals for Dendroctonus jeffreyi (Coleoptera: Curculionidae: Scolytinae).	California	South-western North America	Dendroctonus valens	2009	n-heptane : heptanol	frontalin	Hetro	Attraction to lure	Attraction to lure	10	9.06	6	5.7	6.37	6
692	41	Strom et al	2013	USA	Attractant and disruptant semiochemicals for Dendroctonus jeffreyi (Coleoptera: Curculionidae: Scolytinae).	California	South-western North America	Dendroctonus valens	2009	n-heptane : heptanol	frontalin	Hetro	Attraction to lure	Attraction to lure	8.2	10.53	6	5.7	6.37	6
693	42	Gillette et al	2014	California	Efficacy of verbenone and green leaf volatiles for protecting whitebark and limber pines from attack by mountain pine beetle (Coleoptera: Curculionidae: Scolytinae).	Montana	Central western North America	Dendroctonus ponderosae	2010	trans-verbenol,exo-brevicomin	Verbenone	Vb	Attraction to lure	Attraction to lure	14.2167	3.24	4	32.6734	19.7	4
694	42	Gillette et al	2014	California	Efficacy of verbenone and green leaf volatiles for protecting whitebark and limber pines from attack by mountain pine beetle (Coleoptera: Curculionidae: Scolytinae).	Montana	Central western North America	Dendroctonus ponderosae	2010	trans-verbenol,exo-brevicomin	Verbenone	Vb	Attraction to lure	Attraction to lure	10.9743	2.99	4	61.6056	53.62	4
695	42	Gillette et al	2014	California	Efficacy of verbenone and green leaf volatiles for protecting whitebark and limber pines from attack by mountain pine beetle (Coleoptera: Curculionidae: Scolytinae).	Montana	Central western North America	Dendroctonus ponderosae	2010	trans-verbenol,exo-brevicomin	Verbenone	Vb	Tree attack	Tree attack	13.33	1.13	30	66.67	1.57	30
696	42	Gillette et al	2014	California	Efficacy of verbenone and green leaf volatiles for protecting whitebark and limber pines from attack by mountain pine beetle (Coleoptera: Curculionidae: Scolytinae).	Montana	Central western North America	Dendroctonus ponderosae	2010	trans-verbenol,exo-brevicomin	Verbenone+N-hexyl-alcohol and cis-3-hexen-1-ol	Vb+NHV	Tree attack	Tree attack	10	2.33	30	66.67	1.57	30
697	42	Gillette et al	2014	California	Efficacy of verbenone and green leaf volatiles for protecting whitebark and limber pines from attack by mountain pine beetle (Coleoptera: Curculionidae: Scolytinae).	Montana	Central western North America	Dendroctonus ponderosae	2010	trans-verbenol,exo-brevicomin	Verbenone	Vb	Tree attack	Tree attack	3.33	0.6	30	3.33	0.6	30
698	42	Gillette et al	2014	California	Efficacy of verbenone and green leaf volatiles for protecting whitebark and limber pines from attack by mountain pine beetle (Coleoptera: Curculionidae: Scolytinae).	Montana	Central western North America	Dendroctonus ponderosae	2010	trans-verbenol,exo-brevicomin	Verbenone+N-hexyl-alcohol and cis-3-hexen-1-ol	Vb+NHV	Tree attack	Tree attack	3.33	0.6	30	3.33	0.6	30
699	42	Gillette et al	2014	California	Efficacy of verbenone and green leaf volatiles for protecting whitebark and limber pines from attack by mountain pine beetle (Coleoptera: Curculionidae: Scolytinae).	Colorado	Central western North America	Dendroctonus ponderosae	2010	trans-verbenol,exo-brevicomin	Verbenone	Vb	Tree attack	Tree attack	24.14	1.48	29	86.67	1.33	30
700	42	Gillette et al	2014	California	Efficacy of verbenone and green leaf volatiles for protecting whitebark and limber pines from attack by mountain pine beetle (Coleoptera: Curculionidae: Scolytinae).	Colorado	Central western North America	Dendroctonus ponderosae	2010	trans-verbenol,exo-brevicomin	Verbenone+N-hexyl-alcohol and cis-3-hexen-1-ol	Vb+NHV	Tree attack	Tree attack	36.66	1.66	30	86.67	1.33	30
701	42	Gillette et al	2014	California	Efficacy of verbenone and green leaf volatiles for protecting whitebark and limber pines from attack by mountain pine beetle (Coleoptera: Curculionidae: Scolytinae).	Washington	North-western North America	Dendroctonus ponderosae	2010	trans-verbenol,exo-brevicomin	Verbenone	Vb	Tree attack	Tree attack	0.34	0.68	92	13.67	23.8	184
702	43	Unelius et al	2014	Sweden	Non-host volatile blend optimization for forest protection against the european spruce bark beetle, Ips typographus.	Sweden	Scandinavia	Ips typographus	2006	2-methyl-3-buten-2-ol+cis-verbenol	verbenone	Vb	Attraction to lure	Attraction to lure	0.183936	0.12	21	0.660241	0.17	21
703	43	Unelius et al	2014	Sweden	Non-host volatile blend optimization for forest protection against the european spruce bark beetle, Ips typographus.	Sweden	Scandinavia	Ips typographus	2006	2-methyl-3-buten-2-ol+cis-verbenol	1-hexanol+verbenone	Vb+NHV	Attraction to lure	Attraction to lure	0.0248996	0.03	21	0.660241	0.17	21
704	43	Unelius et al	2014	Sweden	Non-host volatile blend optimization for forest protection against the european spruce bark beetle, Ips typographus.	Sweden	Scandinavia	Ips typographus	2006	2-methyl-3-buten-2-ol+cis-verbenol	trans-conophthorin+1-hexanol+verbenone	Vb+NHV	Attraction to lure	Attraction to lure	0.011245	0.01	21	0.660241	0.17	21
705	43	Unelius et al	2014	Sweden	Non-host volatile blend optimization for forest protection against the european spruce bark beetle, Ips typographus.	Sweden	Scandinavia	Ips typographus	2006	2-methyl-3-buten-2-ol+cis-verbenol	trans-conophthorin+1-hexanol+verbenone	Vb+NHV	Attraction to lure	Attraction to lure	0.011245	0.01	21	0.660241	0.17	21
706	43	Unelius et al	2014	Sweden	Non-host volatile blend optimization for forest protection against the european spruce bark beetle, Ips typographus.	Sweden	Scandinavia	Ips typographus	2006	2-methyl-3-buten-2-ol+cis-verbenol	trans-conophthorin+1-hexanol+verbenone	Vb+NHV	Attraction to lure	Attraction to lure	0.0104418	0.03	21	0.660241	0.17	21
707	43	Unelius et al	2014	Sweden	Non-host volatile blend optimization for forest protection against the european spruce bark beetle, Ips typographus.	Sweden	Scandinavia	Ips typographus	2006	2-methyl-3-buten-2-ol+cis-verbenol	trans-conophthorin+1-hexanol+(3Z)-hexen-1-ol+(2E)-hexen-1-ol+verbenone	Vb+NHV	Attraction to lure	Attraction to lure	0.0104418	0.03	21	0.660241	0.17	21
708	43	Unelius et al	2014	Sweden	Non-host volatile blend optimization for forest protection against the european spruce bark beetle, Ips typographus.	Sweden	Scandinavia	Ips typographus	2007	2-methyl-3-buten-2-ol+cis-verbenol	verbenone	Vb	Attraction to lure	Attraction to lure	0.261215	0.19	80	0.335514	0.2	80
709	43	Unelius et al	2014	Sweden	Non-host volatile blend optimization for forest protection against the european spruce bark beetle, Ips typographus.	Sweden	Scandinavia	Ips typographus	2007	2-methyl-3-buten-2-ol+cis-verbenol	1-hexanol+verbenone	Vb+NHV	Attraction to lure	Attraction to lure	0.118224	0.1	81	0.335514	0.2	81
710	43	Unelius et al	2014	Sweden	Non-host volatile blend optimization for forest protection against the european spruce bark beetle, Ips typographus.	Sweden	Scandinavia	Ips typographus	2007	2-methyl-3-buten-2-ol+cis-verbenol	1-hexanol+verbenone	Vb+NHV	Attraction to lure	Attraction to lure	0.1	0.11	79	0.335514	0.2	79
711	43	Unelius et al	2014	Sweden	Non-host volatile blend optimization for forest protection against the european spruce bark beetle, Ips typographus.	Sweden	Scandinavia	Ips typographus	2007	2-methyl-3-buten-2-ol+cis-verbenol	trans-conophthorin+1-hexanol+verbenone	Vb+NHV	Attraction to lure	Attraction to lure	0.0953271	0.1	81	0.335514	0.2	81
712	43	Unelius et al	2014	Sweden	Non-host volatile blend optimization for forest protection against the european spruce bark beetle, Ips typographus.	Sweden	Scandinavia	Ips typographus	2007	2-methyl-3-buten-2-ol+cis-verbenol	trans-conophthorin+1-hexanol+verbenone	Vb+NHV	Attraction to lure	Attraction to lure	0.0336449	0.05	81	0.335514	0.2	81
713	43	Unelius et al	2014	Sweden	Non-host volatile blend optimization for forest protection against the european spruce bark beetle, Ips typographus.	Sweden	Scandinavia	Ips typographus	2007	2-methyl-3-buten-2-ol+cis-verbenol	Technical grade trans-conophthorin+trans-conophthorin+1-hexanol+verbenone	Vb+NHV	Attraction to lure	Attraction to lure	0.0439252	0.06	81	0.335514	0.2	81
714	43	Unelius et al	2014	Sweden	Non-host volatile blend optimization for forest protection against the european spruce bark beetle, Ips typographus.	Sweden	Scandinavia	Ips typographus	2007	2-methyl-3-buten-2-ol+cis-verbenol	Technical grade trans-conophthorin+trans-conophthorin+1-hexanol+verbenone	Vb+NHV	Attraction to lure	Attraction to lure	0.0205607	0.03	81	0.335514	0.2	81
715	43	Unelius et al	2014	Sweden	Non-host volatile blend optimization for forest protection against the european spruce bark beetle, Ips typographus.	Sweden	Scandinavia	Ips typographus	2008	2-methyl-3-buten-2-ol+cis-verbenol	1-hexanol+verbenone	Vb+NHV	Attraction to lure	Attraction to lure	0.178476	0.09	15	0.40532	0.13	15
716	43	Unelius et al	2014	Sweden	Non-host volatile blend optimization for forest protection against the european spruce bark beetle, Ips typographus.	Sweden	Scandinavia	Ips typographus	2008	2-methyl-3-buten-2-ol+cis-verbenol	dehydro-conophthorin+1-hexanol+verbenone	Vb+NHV	Attraction to lure	Attraction to lure	0.142684	0.08	15	0.40532	0.13	15
717	43	Unelius et al	2014	Sweden	Non-host volatile blend optimization for forest protection against the european spruce bark beetle, Ips typographus.	Sweden	Scandinavia	Ips typographus	2008	2-methyl-3-buten-2-ol+cis-verbenol	trans-conophthorin+1-hexanol+verbenone	Vb+NHV	Attraction to lure	Attraction to lure	0.0652963	0.05	15	0.40532	0.13	15
718	44	Fettig et al	2015	California	A novel semiochemical tool for protecting Pinus contorta from mortality attributed to Dendroctonus ponderosae (Coleoptera: Curculionidae).	Wyoming	Central western North America	Dendroctonus ponderosae	2012-2013	trans-verbenol and exo-brevicomin	verbenone	Vb	Tree killed	Tree killed	0.842825	0.27	30	23.4396	14.72	30
719	44	Fettig et al	2015	California	A novel semiochemical tool for protecting Pinus contorta from mortality attributed to Dendroctonus ponderosae (Coleoptera: Curculionidae).	Idaho	Central western North America	Dendroctonus ponderosae	2012-2013	trans-verbenol and exo-brevicomin	verbenone	Vb	Tree colonization	Tree attack	3.273	4.39	5	11.3183	5.19	5
720	44	Fettig et al	2015	California	A novel semiochemical tool for protecting Pinus contorta from mortality attributed to Dendroctonus ponderosae (Coleoptera: Curculionidae).	Idaho	Central western North America	Dendroctonus ponderosae	2012-2013	trans-verbenol and exo-brevicomin	verbenone	Vb	Tree colonization	Tree attack	4.00151	3.19	5	11.3183	5.19	5
721	44	Fettig et al	2015	California	A novel semiochemical tool for protecting Pinus contorta from mortality attributed to Dendroctonus ponderosae (Coleoptera: Curculionidae).	Idaho	Central western North America	Dendroctonus ponderosae	2012-2013	trans-verbenol and exo-brevicomin	verbenone	Vb	Tree killed	Tree killed	1.46757	2.17	5	7.97134	5.71	5
722	44	Fettig et al	2015	California	A novel semiochemical tool for protecting Pinus contorta from mortality attributed to Dendroctonus ponderosae (Coleoptera: Curculionidae).	Idaho	Central western North America	Dendroctonus ponderosae	2012-2013	trans-verbenol and exo-brevicomin	verbenone	Vb	Tree killed	Tree killed	1.75264	2.08	5	7.97134	5.71	5
723	44	Fettig et al	2015	California	A novel semiochemical tool for protecting Pinus contorta from mortality attributed to Dendroctonus ponderosae (Coleoptera: Curculionidae).	Utah	South-western North America	Dendroctonus ponderosae	2013	trans-verbenol and exo-brevicomin	verbenone	Vb	Attraction to lure	Attraction to lure	15.1	11.09	48	34.5	26.33	48
724	44	Fettig et al	2015	California	A novel semiochemical tool for protecting Pinus contorta from mortality attributed to Dendroctonus ponderosae (Coleoptera: Curculionidae).	Utah	South-western North America	Dendroctonus ponderosae	2013	trans-verbenol and exo-brevicomin	verbenone	Vb	Attraction to lure	Attraction to lure	13.3	10.39	48	34.5	26.33	48
725	44	Fettig et al	2015	California	A novel semiochemical tool for protecting Pinus contorta from mortality attributed to Dendroctonus ponderosae (Coleoptera: Curculionidae).	Utah	South-western North America	Dendroctonus ponderosae	2013	trans-verbenol and exo-brevicomin	verbenone	Vb	Attraction to lure	Attraction to lure	18.4	15.24	48	34.5	26.33	48
726	44	Fettig et al	2015	California	A novel semiochemical tool for protecting Pinus contorta from mortality attributed to Dendroctonus ponderosae (Coleoptera: Curculionidae).	Utah	South-western North America	Dendroctonus ponderosae	2013	trans-verbenol and exo-brevicomin	verbenone	Vb	Attraction to lure	Attraction to lure	25.1	22.86	48	34.5	26.33	48
727	45	Nin-o-Dominguez et al	2016	Mexico	Responses by Dendroctonus frontalis and Dendroctonus mesoamericanus (Coleoptera: Curculionidae) to semiochemical lures in Chiapas, Mexico: possible roles of pheromones during joint host attacks.	Mexico	South-western North America	Dendroctonus frontalis	2013	Turpentine+Frontalin+endo-Brevicomin	Ipsdienol	Homo	Female attraction to lure	Female attraction to lure	1.08	0.76	3	8.30571	3.3	3
728	45	Nin-o-Dominguez et al	2016	Mexico	Responses by Dendroctonus frontalis and Dendroctonus mesoamericanus (Coleoptera: Curculionidae) to semiochemical lures in Chiapas, Mexico: possible roles of pheromones during joint host attacks.	Mexico	South-western North America	Dendroctonus frontalis	2013	Turpentine+Frontalin	Ipsdienol	Homo	Female attraction to lure	Female attraction to lure	0.128571	0.09	3	0.771429	0.4	3
729	45	Nin-o-Dominguez et al	2016	Mexico	Responses by Dendroctonus frontalis and Dendroctonus mesoamericanus (Coleoptera: Curculionidae) to semiochemical lures in Chiapas, Mexico: possible roles of pheromones during joint host attacks.	Mexico	South-western North America	Dendroctonus frontalis	2013	Turpentine+Frontalin+endo-Brevicomin	Ipsdienol	Homo	Male attraction to lure	Male attraction to lure	3.06	1.47	3	11.5457	3.79	3
730	45	Nin-o-Dominguez et al	2016	Mexico	Responses by Dendroctonus frontalis and Dendroctonus mesoamericanus (Coleoptera: Curculionidae) to semiochemical lures in Chiapas, Mexico: possible roles of pheromones during joint host attacks.	Mexico	South-western North America	Dendroctonus frontalis	2013	Turpentine+Frontalin	Ipsdienol	Homo	Male attraction to lure	Male attraction to lure	0.308571	0.36	3	3.00857	1.11	3
731	45	Nin-o-Dominguez et al	2016	Mexico	Responses by Dendroctonus frontalis and Dendroctonus mesoamericanus (Coleoptera: Curculionidae) to semiochemical lures in Chiapas, Mexico: possible roles of pheromones during joint host attacks.	Mexico	South-western North America	Dendroctonus frontalis	2013	Turpentine+endo-Brevicomin	Ipsdienol	Homo	Female attraction to lure	Female attraction to lure	0.04	0.12	9	0.04	0.12	9
732	45	Nin-o-Dominguez et al	2016	Mexico	Responses by Dendroctonus frontalis and Dendroctonus mesoamericanus (Coleoptera: Curculionidae) to semiochemical lures in Chiapas, Mexico: possible roles of pheromones during joint host attacks.	Mexico	South-western North America	Dendroctonus frontalis	2013	Turpentine+endo-Brevicomin+Frontalin	Ipsdienol	Homo	Female attraction to lure	Female attraction to lure	0.3	0.3	9	1.7	1.5	9
733	45	Nin-o-Dominguez et al	2016	Mexico	Responses by Dendroctonus frontalis and Dendroctonus mesoamericanus (Coleoptera: Curculionidae) to semiochemical lures in Chiapas, Mexico: possible roles of pheromones during joint host attacks.	Mexico	South-western North America	Dendroctonus frontalis	2013	Turpentine+Frontalin	Ipsdienol	Homo	Male attraction to lure	Male attraction to lure	0.07	0.15	9	0.52	0.57	9
734	45	Nin-o-Dominguez et al	2016	Mexico	Responses by Dendroctonus frontalis and Dendroctonus mesoamericanus (Coleoptera: Curculionidae) to semiochemical lures in Chiapas, Mexico: possible roles of pheromones during joint host attacks.	Mexico	South-western North America	Dendroctonus frontalis	2013	Turpentine+endo-Brevicomin	Ipsdienol	Homo	Male attraction to lure	Male attraction to lure	0.04	0.12	9	0.07	0.15	9
735	45	Nin-o-Dominguez et al	2016	Mexico	Responses by Dendroctonus frontalis and Dendroctonus mesoamericanus (Coleoptera: Curculionidae) to semiochemical lures in Chiapas, Mexico: possible roles of pheromones during joint host attacks.	Mexico	South-western North America	Dendroctonus frontalis	2013	Turpentine+endo-Brevicomin+Frontalin	Ipsdienol	Homo	Male attraction to lure	Male attraction to lure	0.89	1.14	9	5	2.7	9
736	45	Nin-o-Dominguez et al	2016	Mexico	Responses by Dendroctonus frontalis and Dendroctonus mesoamericanus (Coleoptera: Curculionidae) to semiochemical lures in Chiapas, Mexico: possible roles of pheromones during joint host attacks.	Mexico	South-western North America	Dendroctonus mesoamericanus	2013	Turpentine+Frontalin	Ipsdienol	Homo	Female attraction to lure	Female attraction to lure	0.04	0.12	9	0.04	0.12	9
737	45	Nin-o-Dominguez et al	2016	Mexico	Responses by Dendroctonus frontalis and Dendroctonus mesoamericanus (Coleoptera: Curculionidae) to semiochemical lures in Chiapas, Mexico: possible roles of pheromones during joint host attacks.	Mexico	South-western North America	Dendroctonus mesoamericanus	2013	Turpentine+endo-Brevicomin+Frontalin	Ipsdienol	Homo	Male attraction to lure	Male attraction to lure	0.04	0.12	9	0.07	0.15	9
738	45	Nin-o-Dominguez et al	2016	Mexico	Responses by Dendroctonus frontalis and Dendroctonus mesoamericanus (Coleoptera: Curculionidae) to semiochemical lures in Chiapas, Mexico: possible roles of pheromones during joint host attacks.	Mexico	South-western North America	Dendroctonus frontalis	2013	Turpentine+endo-Brevicomin+Frontalin	Ipsdienol	Homo	Female attraction to lure	Female attraction to lure	0.2	0.22	5	1.5	1.34	5
739	45	Nin-o-Dominguez et al	2016	Mexico	Responses by Dendroctonus frontalis and Dendroctonus mesoamericanus (Coleoptera: Curculionidae) to semiochemical lures in Chiapas, Mexico: possible roles of pheromones during joint host attacks.	Mexico	South-western North America	Dendroctonus frontalis	2013	Turpentine+endo-Brevicomin+Frontalin	Ipsdienol	Homo	Female attraction to lure	Female attraction to lure	0.8	0.89	5	1.5	1.34	5
740	45	Nin-o-Dominguez et al	2016	Mexico	Responses by Dendroctonus frontalis and Dendroctonus mesoamericanus (Coleoptera: Curculionidae) to semiochemical lures in Chiapas, Mexico: possible roles of pheromones during joint host attacks.	Mexico	South-western North America	Dendroctonus frontalis	2013	Turpentine+endo-Brevicomin+Frontalin	Ipsdienol	Homo	Male attraction to lure	Male attraction to lure	0.7	0.67	5	3.5	2.24	5
741	45	Nin-o-Dominguez et al	2016	Mexico	Responses by Dendroctonus frontalis and Dendroctonus mesoamericanus (Coleoptera: Curculionidae) to semiochemical lures in Chiapas, Mexico: possible roles of pheromones during joint host attacks.	Mexico	South-western North America	Dendroctonus frontalis	2013	Turpentine+endo-Brevicomin+Frontalin	Ipsdienol	Homo	Male attraction to lure	Male attraction to lure	0.4	3.35	5	3.5	2.24	5
742	45	Nin-o-Dominguez et al	2016	Mexico	Responses by Dendroctonus frontalis and Dendroctonus mesoamericanus (Coleoptera: Curculionidae) to semiochemical lures in Chiapas, Mexico: possible roles of pheromones during joint host attacks.	Mexico	South-western North America	Dendroctonus frontalis	2013	Turpentine+endo-Brevicomin+Frontalin	Ipsdienol	Homo	Male attraction to lure	Male attraction to lure	3.3	3.35	5	3.5	2.24	5
743	45	Nin-o-Dominguez et al	2016	Mexico	Responses by Dendroctonus frontalis and Dendroctonus mesoamericanus (Coleoptera: Curculionidae) to semiochemical lures in Chiapas, Mexico: possible roles of pheromones during joint host attacks.	Mexico	South-western North America	Dendroctonus mesoamericanus	2013	Turpentine+endo-Brevicomin+Frontalin	Ipsdienol	Homo	Female attraction to lure	Female attraction to lure	0.2	0.45	5	0.2	0.22	5
744	45	Nin-o-Dominguez et al	2016	Mexico	Responses by Dendroctonus frontalis and Dendroctonus mesoamericanus (Coleoptera: Curculionidae) to semiochemical lures in Chiapas, Mexico: possible roles of pheromones during joint host attacks.	Mexico	South-western North America	Dendroctonus mesoamericanus	2013	Turpentine+endo-Brevicomin+Frontalin	Ipsdienol	Homo	Male attraction to lure	Male attraction to lure	0.4	0.45	5	0.2	0.22	5
745	45	Nin-o-Dominguez et al	2016	Mexico	Responses by Dendroctonus frontalis and Dendroctonus mesoamericanus (Coleoptera: Curculionidae) to semiochemical lures in Chiapas, Mexico: possible roles of pheromones during joint host attacks.	Mexico	South-western North America	Dendroctonus mesoamericanus	2013	Turpentine+Frontalin+endo-Brevicomin	Ipsdienol	Homo	Attraction to lure	Attraction to lure	0.210085	0.15	3	0.0523091	0.05	3
746	46	Hansen et al	2019	USA	Advances in semiochemical repellents to mitigate host mortality from the spruce beetle (Coleoptera: Curculionidae).	Utah	South-western North America	Dendroctonus rufipennis	2013	Frontalin + (MCOL)1-methyl-2-cyclohexen-1-ol+host terpene blend	Verbenone	Vb	Attraction to lure	Attraction to lure	6.15	0.37	8	6.17	0.37	8
747	46	Hansen et al	2019	USA	Advances in semiochemical repellents to mitigate host mortality from the spruce beetle (Coleoptera: Curculionidae).	Utah	South-western North America	Dendroctonus rufipennis	2013	Frontalin + (MCOL)1-methyl-2-cyclohexen-1-ol+host terpene blend	cis-Carveol	Host Repellent	Attraction to lure	Attraction to lure	6.25	0.34	8	6.17	0.37	8
748	46	Hansen et al	2019	USA	Advances in semiochemical repellents to mitigate host mortality from the spruce beetle (Coleoptera: Curculionidae).	Utah	South-western North America	Dendroctonus rufipennis	2013	Frontalin + (MCOL)1-methyl-2-cyclohexen-1-ol+host terpene blend	Carvone	Host Repellent	Attraction to lure	Attraction to lure	6.03	0.34	8	6.17	0.37	8
749	46	Hansen et al	2019	USA	Advances in semiochemical repellents to mitigate host mortality from the spruce beetle (Coleoptera: Curculionidae).	Utah	South-western North America	Dendroctonus rufipennis	2013	Frontalin + (MCOL)1-methyl-2-cyclohexen-1-ol+host terpene blend	Piperitone	Host Repellent	Attraction to lure	Attraction to lure	5.98	0.34	8	6.17	0.37	8
750	46	Hansen et al	2019	USA	Advances in semiochemical repellents to mitigate host mortality from the spruce beetle (Coleoptera: Curculionidae).	Utah	South-western North America	Dendroctonus rufipennis	2013	Frontalin + (MCOL)1-methyl-2-cyclohexen-1-ol+host terpene blend	Isophorone plus sulcatone	NHV	Attraction to lure	Attraction to lure	5.15	0.37	8	6.17	0.37	8
751	46	Hansen et al	2019	USA	Advances in semiochemical repellents to mitigate host mortality from the spruce beetle (Coleoptera: Curculionidae).	Utah	South-western North America	Dendroctonus rufipennis	2014	Frontalin + (MCOL)1-methyl-2-cyclohexen-1-ol+host terpene blend	Limonene epoxide	Host Repellent	Attraction to lure	Attraction to lure	5.01	0.74	8	5.07	0.74	8
752	46	Hansen et al	2019	USA	Advances in semiochemical repellents to mitigate host mortality from the spruce beetle (Coleoptera: Curculionidae).	Utah	South-western North America	Dendroctonus rufipennis	2014	Frontalin + (MCOL)1-methyl-2-cyclohexen-1-ol+host terpene blend	Eucarvone	Host Repellent	Attraction to lure	Attraction to lure	5.19	0.74	8	5.07	0.74	8
753	46	Hansen et al	2019	USA	Advances in semiochemical repellents to mitigate host mortality from the spruce beetle (Coleoptera: Curculionidae).	Utah	South-western North America	Dendroctonus rufipennis	2014	Frontalin + (MCOL)1-methyl-2-cyclohexen-1-ol+host terpene blend	Pentyl furan	Host Repellent	Attraction to lure	Attraction to lure	5.14	0.74	8	5.07	0.74	8
754	46	Hansen et al	2019	USA	Advances in semiochemical repellents to mitigate host mortality from the spruce beetle (Coleoptera: Curculionidae).	Utah	South-western North America	Dendroctonus rufipennis	2014	Frontalin + (MCOL)1-methyl-2-cyclohexen-1-ol+host terpene blend	Carene oxide	Host Repellent	Attraction to lure	Attraction to lure	5.12	0.74	8	5.07	0.74	8
755	46	Hansen et al	2019	USA	Advances in semiochemical repellents to mitigate host mortality from the spruce beetle (Coleoptera: Curculionidae).	Utah	South-western North America	Dendroctonus rufipennis	2014	Frontalin + (MCOL)1-methyl-2-cyclohexen-1-ol+host terpene blend	cis-Carveol	Host Repellent	Attraction to lure	Attraction to lure	5.11	0.74	8	5.07	0.74	8
756	46	Hansen et al	2019	USA	Advances in semiochemical repellents to mitigate host mortality from the spruce beetle (Coleoptera: Curculionidae).	Utah	South-western North America	Dendroctonus rufipennis	2014	Frontalin + (MCOL)1-methyl-2-cyclohexen-1-ol+host terpene blend	3-Pinene-2-ol	Host Repellent	Attraction to lure	Attraction to lure	5.09	0.74	8	5.07	0.74	8
757	46	Hansen et al	2019	USA	Advances in semiochemical repellents to mitigate host mortality from the spruce beetle (Coleoptera: Curculionidae).	Utah	South-western North America	Dendroctonus rufipennis	2014	Frontalin + (MCOL)1-methyl-2-cyclohexen-1-ol+host terpene blend	Carvone	Host Repellent	Attraction to lure	Attraction to lure	5.15	0.28	8	5.22	0.28	8
758	46	Hansen et al	2019	USA	Advances in semiochemical repellents to mitigate host mortality from the spruce beetle (Coleoptera: Curculionidae).	Utah	South-western North America	Dendroctonus rufipennis	2014	Frontalin + (MCOL)1-methyl-2-cyclohexen-1-ol+host terpene blend	Celery ketone	Host Repellent	Attraction to lure	Attraction to lure	5.27	0.74	8	5.22	0.28	8
759	46	Hansen et al	2019	USA	Advances in semiochemical repellents to mitigate host mortality from the spruce beetle (Coleoptera: Curculionidae).	Utah	South-western North America	Dendroctonus rufipennis	2015	Frontalin + (MCOL)1-methyl-2-cyclohexen-1-ol+host terpene blend	Nopol	Host Repellent	Attraction to lure	Attraction to lure	5.38	0.57	10	5.5	0.57	10
760	46	Hansen et al	2019	USA	Advances in semiochemical repellents to mitigate host mortality from the spruce beetle (Coleoptera: Curculionidae).	Utah	South-western North America	Dendroctonus rufipennis	2015	Frontalin + (MCOL)1-methyl-2-cyclohexen-1-ol+host terpene blend	Terpene-4-ol	Host Repellent	Attraction to lure	Attraction to lure	5.24	0.57	10	5.5	0.57	10
761	46	Hansen et al	2019	USA	Advances in semiochemical repellents to mitigate host mortality from the spruce beetle (Coleoptera: Curculionidae).	Utah	South-western North America	Dendroctonus rufipennis	2015	Frontalin + (MCOL)1-methyl-2-cyclohexen-1-ol+host terpene blend	Isophorone plus sulcatone	NHV	Attraction to lure	Attraction to lure	4.18	0.57	10	5.5	0.57	10
762	46	Hansen et al	2019	USA	Advances in semiochemical repellents to mitigate host mortality from the spruce beetle (Coleoptera: Curculionidae).	Utah	South-western North America	Dendroctonus rufipennis	2015	Frontalin + (MCOL)1-methyl-2-cyclohexen-1-ol+host terpene blend	MCH	Homo	Attraction to lure	Attraction to lure	2.26	0.57	10	5.5	0.57	10
763	46	Hansen et al	2019	USA	Advances in semiochemical repellents to mitigate host mortality from the spruce beetle (Coleoptera: Curculionidae).	Utah	South-western North America	Dendroctonus rufipennis	2015	Frontalin + (MCOL)1-methyl-2-cyclohexen-1-ol+host terpene blend	MCH plus isophorone plus sulcatone	Homo+NHV	Attraction to lure	Attraction to lure	1.94	0.6	10	5.5	0.57	10
764	46	Hansen et al	2019	USA	Advances in semiochemical repellents to mitigate host mortality from the spruce beetle (Coleoptera: Curculionidae).	Utah	South-western North America	Dendroctonus rufipennis	2015	Frontalin + (MCOL)1-methyl-2-cyclohexen-1-ol+host terpene blend	Sulcatol	NHV	Attraction to lure	Attraction to lure	4.97	0.35	10	5	0.35	10
765	46	Hansen et al	2019	USA	Advances in semiochemical repellents to mitigate host mortality from the spruce beetle (Coleoptera: Curculionidae).	Utah	South-western North America	Dendroctonus rufipennis	2015	Frontalin + (MCOL)1-methyl-2-cyclohexen-1-ol+host terpene blend	Cymene-8-ol	NHV	Attraction to lure	Attraction to lure	4.87	0.35	10	5	0.35	10
766	46	Hansen et al	2019	USA	Advances in semiochemical repellents to mitigate host mortality from the spruce beetle (Coleoptera: Curculionidae).	Utah	South-western North America	Dendroctonus rufipennis	2015	Frontalin + (MCOL)1-methyl-2-cyclohexen-1-ol+host terpene blend	Methylbutenol	NHV	Attraction to lure	Attraction to lure	5	0.35	10	5	0.35	10
767	46	Hansen et al	2019	USA	Advances in semiochemical repellents to mitigate host mortality from the spruce beetle (Coleoptera: Curculionidae).	Utah	South-western North America	Dendroctonus rufipennis	2015	Frontalin + (MCOL)1-methyl-2-cyclohexen-1-ol+host terpene blend	linalool, β-carophyllene, and Z3-hexenol	NHV	Attraction to lure	Attraction to lure	3.37	0.35	10	5	0.35	10
768	46	Hansen et al	2019	USA	Advances in semiochemical repellents to mitigate host mortality from the spruce beetle (Coleoptera: Curculionidae).	Utah	South-western North America	Dendroctonus rufipennis	2015	Frontalin + (MCOL)1-methyl-2-cyclohexen-1-ol+ α-pinene	MCH (400 mg × 10)	Homo	Attraction to lure	Attraction to lure	2.29	0.59	8	5.08	0.51	8
769	46	Hansen et al	2019	USA	Advances in semiochemical repellents to mitigate host mortality from the spruce beetle (Coleoptera: Curculionidae).	Utah	South-western North America	Dendroctonus rufipennis	2015	Frontalin + (MCOL)1-methyl-2-cyclohexen-1-ol+ α-pinene	MCH with leaf alcohols	NHV	Attraction to lure	Attraction to lure	1.88	0.59	8	5.08	0.51	8
770	46	Hansen et al	2019	USA	Advances in semiochemical repellents to mitigate host mortality from the spruce beetle (Coleoptera: Curculionidae).	Colorado	Central western North America	Dendroctonus rufipennis	2017	Frontalin + (MCOL)1-methyl-2-cyclohexen-1-ol+ α-pinene	β-Caryophyllene	NHV	Attraction to lure	Attraction to lure	5.02	0.42	8	5.22	0.42	8
771	46	Hansen et al	2019	USA	Advances in semiochemical repellents to mitigate host mortality from the spruce beetle (Coleoptera: Curculionidae).	Colorado	Central western North America	Dendroctonus rufipennis	2017	Frontalin + (MCOL)1-methyl-2-cyclohexen-1-ol+ α-pinene	Linalool + β-caryophyllene	NHV	Attraction to lure	Attraction to lure	4.79	0.42	8	5.22	0.42	8
772	46	Hansen et al	2019	USA	Advances in semiochemical repellents to mitigate host mortality from the spruce beetle (Coleoptera: Curculionidae).	Colorado	Central western North America	Dendroctonus rufipennis	2017	Frontalin + (MCOL)1-methyl-2-cyclohexen-1-ol+ α-pinene	Linalool	NHV	Attraction to lure	Attraction to lure	4.77	0.42	8	5.22	0.42	8
773	46	Hansen et al	2019	USA	Advances in semiochemical repellents to mitigate host mortality from the spruce beetle (Coleoptera: Curculionidae).	Colorado	Central western North America	Dendroctonus rufipennis	2017	Frontalin + (MCOL)1-methyl-2-cyclohexen-1-ol+ α-pinene	MCH (reduced)	Homo	Attraction to lure	Attraction to lure	3.38	0.42	8	5.22	0.42	8
774	46	Hansen et al	2019	USA	Advances in semiochemical repellents to mitigate host mortality from the spruce beetle (Coleoptera: Curculionidae).	Utah	South-western North America	Dendroctonus rufipennis	2017	Frontalin + (MCOL)1-methyl-2-cyclohexen-1-ol+ α-pinene	Linaloo	NHV	Attraction to lure	Attraction to lure	5.65	0.28	8	5.69	0.28	8
775	46	Hansen et al	2019	USA	Advances in semiochemical repellents to mitigate host mortality from the spruce beetle (Coleoptera: Curculionidae).	Utah	South-western North America	Dendroctonus rufipennis	2017	Frontalin + (MCOL)1-methyl-2-cyclohexen-1-ol+ α-pinene	MCH (reduced)	Homo	Attraction to lure	Attraction to lure	4.01	0.28	8	5.69	0.28	8
776	46	Hansen et al	2019	USA	Advances in semiochemical repellents to mitigate host mortality from the spruce beetle (Coleoptera: Curculionidae).	Utah	South-western North America	Dendroctonus rufipennis	2017	Frontalin + (MCOL)1-methyl-2-cyclohexen-1-ol+ α-pinene	β-Caryophyllene	NHV	Attraction to lure	Attraction to lure	5.93	0.28	8	5.69	0.28	8
777	46	Hansen et al	2019	USA	Advances in semiochemical repellents to mitigate host mortality from the spruce beetle (Coleoptera: Curculionidae).	Utah	South-western North America	Dendroctonus rufipennis	2017	Frontalin + (MCOL)1-methyl-2-cyclohexen-1-ol+ α-pinene	Leaf alcohol	NHV	Attraction to lure	Attraction to lure	5.91	0.28	8	5.69	0.28	8
778	46	Hansen et al	2019	USA	Advances in semiochemical repellents to mitigate host mortality from the spruce beetle (Coleoptera: Curculionidae).	Utah	South-western North America	Dendroctonus rufipennis	2017	Frontalin + (MCOL)1-methyl-2-cyclohexen-1-ol+ α-pinene	MCH + linalool + β-caryophyllene	Homo+NHV	Attraction to lure	Attraction to lure	3.96	0.34	8	6.26	0.34	8
779	46	Hansen et al	2019	USA	Advances in semiochemical repellents to mitigate host mortality from the spruce beetle (Coleoptera: Curculionidae).	Utah	South-western North America	Dendroctonus rufipennis	2017	Frontalin + (MCOL)1-methyl-2-cyclohexen-1-ol+ α-pinene	MCH + linalool + leaf alcohol	Homo+NHV	Attraction to lure	Attraction to lure	3.9	0.34	8	6.26	0.34	8
780	46	Hansen et al	2019	USA	Advances in semiochemical repellents to mitigate host mortality from the spruce beetle (Coleoptera: Curculionidae).	Utah	South-western North America	Dendroctonus rufipennis	2017	Frontalin + (MCOL)1-methyl-2-cyclohexen-1-ol+ α-pinene	MCH + β-caryophyllene + alcohol	Homo+NHV	Attraction to lure	Attraction to lure	3.89	0.34	8	6.26	0.34	8
781	46	Hansen et al	2019	USA	Advances in semiochemical repellents to mitigate host mortality from the spruce beetle (Coleoptera: Curculionidae).	Utah	South-western North America	Dendroctonus rufipennis	2017	Frontalin + (MCOL)1-methyl-2-cyclohexen-1-ol+ α-pinene	MCH + AKB (linalool, β-caryophyllene, Z3-hexenol)	Homo+NHV	Attraction to lure	Attraction to lure	3.5	0.34	8	6.26	0.34	8
782	47	Fettig and Munson	2020	California	Efficacy of verbenone and a blend of verbenone and nonhost volatiles for protecting lodgepole pine from mountain pine beetle (Coleoptera: Curculionidae)	Utah	South-western North America	Dendroctonus ponderosae	2008	trans-verbenol and exo-brevicomin	Verbenone	Vb	Tree attack	Tree attack	0.665188	1.48	25	49.2239	43.24	25
783	47	Fettig and Munson	2020	California	Efficacy of verbenone and a blend of verbenone and nonhost volatiles for protecting lodgepole pine from mountain pine beetle (Coleoptera: Curculionidae)	Utah	South-western North America	Dendroctonus ponderosae	2008	trans-verbenol and exo-brevicomin	verbenone, acetophenone, and (E)-2-hexen-1-ol+(Z)-2-hexen-1-ol	Vb+hetro+NHV	Tree attack	Tree attack	0.517369	1.48	25	49.2239	43.24	25
784	47	Fettig and Munson	2020	California	Efficacy of verbenone and a blend of verbenone and nonhost volatiles for protecting lodgepole pine from mountain pine beetle (Coleoptera: Curculionidae)	Utah	South-western North America	Dendroctonus ponderosae	2008	trans-verbenol and exo-brevicomin	Verbenone	Vb	Tree attack	Tree attack	5.91279	14.41	25	66.371	55.8	25
785	47	Fettig and Munson	2020	California	Efficacy of verbenone and a blend of verbenone and nonhost volatiles for protecting lodgepole pine from mountain pine beetle (Coleoptera: Curculionidae)	Utah	South-western North America	Dendroctonus ponderosae	2008	trans-verbenol and exo-brevicomin	verbenone, acetophenone, and (E)-2-hexen-1-ol+(Z)-2-hexen-1-ol	Vb+hetro+NHV	Tree attack	Tree attack	5.69106	14.41	25	66.371	55.8	25
786	47	Fettig and Munson	2020	California	Efficacy of verbenone and a blend of verbenone and nonhost volatiles for protecting lodgepole pine from mountain pine beetle (Coleoptera: Curculionidae)	Idaho	Central western North America	Dendroctonus ponderosae	2011-13	trans-verbenol and exo-brevicomin	Verbenone	Vb	Tree killed	Tree killed	3.31836	2.86	5	10.096	5.82	5
787	47	Fettig and Munson	2020	California	Efficacy of verbenone and a blend of verbenone and nonhost volatiles for protecting lodgepole pine from mountain pine beetle (Coleoptera: Curculionidae)	Idaho	Central western North America	Dendroctonus ponderosae	2011-13	trans-verbenol and exo-brevicomin	verbenone, acetophenone, and (E)-2-hexen-1-ol+(Z)-2-hexen-1-ol	Vb+hetro+NHV	Tree killed	Tree killed	2.91712	1.82	5	10.096	5.82	5
788	48	Munro et al	2020	USA	Electrophysiological and behavioral responses Dendroctonus frontalis and D. terebrans (Coleoptera: Curculionidae) to resin odors of host pines (Pinus spp.).	Georgia	South-eastern North America	Dendroctonus frontalis	2018	frontalin, endo-brevicomin,+ exo-brevicomin	low 1,4 cineola	Host Repellent	Attraction to lure	Attraction to lure	0.272975	6.18	32	1.36488	10.81	32
789	48	Munro et al	2020	USA	Electrophysiological and behavioral responses Dendroctonus frontalis and D. terebrans (Coleoptera: Curculionidae) to resin odors of host pines (Pinus spp.).	Georgia	South-eastern North America	Dendroctonus frontalis	2018	frontalin, endo-brevicomin,+ exo-brevicomin	high 1,4 cineola	Host Repellent	Attraction to lure	Attraction to lure	0.760778	0.28	32	1.36488	10.81	32
790	48	Munro et al	2020	USA	Electrophysiological and behavioral responses Dendroctonus frontalis and D. terebrans (Coleoptera: Curculionidae) to resin odors of host pines (Pinus spp.).	Georgia	South-eastern North America	Dendroctonus frontalis	2018	frontalin, endo-brevicomin,+ exo-brevicomin	Eucalyptol	Host Repellent	Attraction to lure	Attraction to lure	2.1838	9.27	32	1.36488	10.81	32
791	48	Munro et al	2020	USA	Electrophysiological and behavioral responses Dendroctonus frontalis and D. terebrans (Coleoptera: Curculionidae) to resin odors of host pines (Pinus spp.).	Georgia	South-eastern North America	Dendroctonus frontalis	2018	frontalin, endo-brevicomin,+ exo-brevicomin	Myrcene	Host Repellent	Attraction to lure	Attraction to lure	0.455063	3.86	32	1.36488	10.81	32
792	48	Munro et al	2020	USA	Electrophysiological and behavioral responses Dendroctonus frontalis and D. terebrans (Coleoptera: Curculionidae) to resin odors of host pines (Pinus spp.).	Georgia	South-eastern North America	Dendroctonus frontalis	2018	frontalin, endo-brevicomin,+ exo-brevicomin	β-pinene	Host Repellent	Attraction to lure	Attraction to lure	34.6679	77.21	32	1.36488	10.81	32
793	48	Munro et al	2020	USA	Electrophysiological and behavioral responses Dendroctonus frontalis and D. terebrans (Coleoptera: Curculionidae) to resin odors of host pines (Pinus spp.).	Georgia	South-eastern North America	Dendroctonus frontalis	2018	frontalin, endo-brevicomin,+ exo-brevicomin	α-pinene	Host Repellent	Attraction to lure	Attraction to lure	165.969	262.51	32	1.36488	10.81	32
794	48	Munro et al	2020	USA	Electrophysiological and behavioral responses Dendroctonus frontalis and D. terebrans (Coleoptera: Curculionidae) to resin odors of host pines (Pinus spp.).	Georgia	South-eastern North America	Dendroctonus frontalis	2018	frontalin, endo-brevicomin,+ exo-brevicomin	4-allylanisole	Host Repellent	Attraction to lure	Attraction to lure	181.256	506.49	32	1.36488	10.81	32
795	48	Munro et al	2020	USA	Electrophysiological and behavioral responses Dendroctonus frontalis and D. terebrans (Coleoptera: Curculionidae) to resin odors of host pines (Pinus spp.).	Georgia	South-eastern North America	Dendroctonus terebrans	2018	frontalin, endo-brevicomin,+ exo-brevicomin	low 1,4 cineola	Host Repellent	Attraction to lure	Attraction to lure	0.683929	1.22	32	0.0928571	0.28	32
796	48	Munro et al	2020	USA	Electrophysiological and behavioral responses Dendroctonus frontalis and D. terebrans (Coleoptera: Curculionidae) to resin odors of host pines (Pinus spp.).	Georgia	South-eastern North America	Dendroctonus terebrans	2018	frontalin, endo-brevicomin,+ exo-brevicomin	high 1,4 cineola	Host Repellent	Attraction to lure	Attraction to lure	0.748214	1.64	32	0.0928571	0.28	32
797	48	Munro et al	2020	USA	Electrophysiological and behavioral responses Dendroctonus frontalis and D. terebrans (Coleoptera: Curculionidae) to resin odors of host pines (Pinus spp.).	Georgia	South-eastern North America	Dendroctonus terebrans	2018	frontalin, endo-brevicomin,+ exo-brevicomin	Eucalyptol	Host Repellent	Attraction to lure	Attraction to lure	0.183929	0.41	32	0.0928571	0.28	32
798	48	Munro et al	2020	USA	Electrophysiological and behavioral responses Dendroctonus frontalis and D. terebrans (Coleoptera: Curculionidae) to resin odors of host pines (Pinus spp.).	Georgia	South-eastern North America	Dendroctonus terebrans	2018	frontalin, endo-brevicomin,+ exo-brevicomin	Myrcene	Host Repellent	Attraction to lure	Attraction to lure	0.375	0.62	32	0.0928571	0.28	32
799	48	Munro et al	2020	USA	Electrophysiological and behavioral responses Dendroctonus frontalis and D. terebrans (Coleoptera: Curculionidae) to resin odors of host pines (Pinus spp.).	Georgia	South-eastern North America	Dendroctonus terebrans	2018	frontalin, endo-brevicomin,+ exo-brevicomin	β-pinene	Host Repellent	Attraction to lure	Attraction to lure	0.873214	1.24	32	0.0928571	0.28	32
800	48	Munro et al	2020	USA	Electrophysiological and behavioral responses Dendroctonus frontalis and D. terebrans (Coleoptera: Curculionidae) to resin odors of host pines (Pinus spp.).	Georgia	South-eastern North America	Dendroctonus terebrans	2018	frontalin, endo-brevicomin,+ exo-brevicomin	α-pinene	Host Repellent	Attraction to lure	Attraction to lure	1.56071	2.23	32	0.0928571	0.28	32
801	48	Munro et al	2020	USA	Electrophysiological and behavioral responses Dendroctonus frontalis and D. terebrans (Coleoptera: Curculionidae) to resin odors of host pines (Pinus spp.).	Georgia	South-eastern North America	Dendroctonus terebrans	2018	frontalin, endo-brevicomin,+ exo-brevicomin	4-allylanisole	Host Repellent	Attraction to lure	Attraction to lure	0.717857	1.01	32	0.0928571	0.28	32
802	48	Munro et al	2020	USA	Electrophysiological and behavioral responses Dendroctonus frontalis and D. terebrans (Coleoptera: Curculionidae) to resin odors of host pines (Pinus spp.).	Georgia	South-eastern North America	Dendroctonus frontalis	2018	frontalin, endo-brevicomin,+ exo-brevicomin+α-pinene	Eucalyptol	Host Repellent	Attraction to lure	Attraction to lure	70.7885	44.08	20	54.5699	34.06	20
803	48	Munro et al	2020	USA	Electrophysiological and behavioral responses Dendroctonus frontalis and D. terebrans (Coleoptera: Curculionidae) to resin odors of host pines (Pinus spp.).	Georgia	South-eastern North America	Dendroctonus frontalis	2018	frontalin, endo-brevicomin,+ exo-brevicomin+α-pinene	high 1,4 cineola	Host Repellent	Attraction to lure	Attraction to lure	65.3226	42.88	20	54.5699	34.06	20
804	48	Munro et al	2020	USA	Electrophysiological and behavioral responses Dendroctonus frontalis and D. terebrans (Coleoptera: Curculionidae) to resin odors of host pines (Pinus spp.).	Georgia	South-eastern North America	Dendroctonus frontalis	2018	frontalin, endo-brevicomin,+ exo-brevicomin+α-pinene	low 1,4 cineola	Host Repellent	Attraction to lure	Attraction to lure	70.2509	55.3	20	54.5699	34.06	20
805	48	Munro et al	2020	USA	Electrophysiological and behavioral responses Dendroctonus frontalis and D. terebrans (Coleoptera: Curculionidae) to resin odors of host pines (Pinus spp.).	Georgia	South-eastern North America	Dendroctonus frontalis	2018	frontalin, endo-brevicomin,+ exo-brevicomin+α-pinene	Myrcene	Host Repellent	Attraction to lure	Attraction to lure	37.276	22.84	20	54.5699	34.06	20
806	48	Munro et al	2020	USA	Electrophysiological and behavioral responses Dendroctonus frontalis and D. terebrans (Coleoptera: Curculionidae) to resin odors of host pines (Pinus spp.).	Georgia	South-eastern North America	Dendroctonus terebrans	2018	frontalin, endo-brevicomin,+ exo-brevicomin+α-pinene	Eucalyptol	Host Repellent	Attraction to lure	Attraction to lure	2.53805	2.34	20	0.99115	1.44	20
807	48	Munro et al	2020	USA	Electrophysiological and behavioral responses Dendroctonus frontalis and D. terebrans (Coleoptera: Curculionidae) to resin odors of host pines (Pinus spp.).	Georgia	South-eastern North America	Dendroctonus terebrans	2018	frontalin, endo-brevicomin,+ exo-brevicomin+α-pinene	high 1,4 cineola	Host Repellent	Attraction to lure	Attraction to lure	2.29735	2.06	20	0.99115	1.44	20
808	48	Munro et al	2020	USA	Electrophysiological and behavioral responses Dendroctonus frontalis and D. terebrans (Coleoptera: Curculionidae) to resin odors of host pines (Pinus spp.).	Georgia	South-eastern North America	Dendroctonus terebrans	2018	frontalin, endo-brevicomin,+ exo-brevicomin+α-pinene	low 1,4 cineola	Host Repellent	Attraction to lure	Attraction to lure	1.74867	1.46	20	0.99115	1.44	20
809	48	Munro et al	2020	USA	Electrophysiological and behavioral responses Dendroctonus frontalis and D. terebrans (Coleoptera: Curculionidae) to resin odors of host pines (Pinus spp.).	Georgia	South-eastern North America	Dendroctonus terebrans	2018	frontalin, endo-brevicomin,+ exo-brevicomin+α-pinene	Myrcene	Host Repellent	Attraction to lure	Attraction to lure	0.697345	1.2	20	0.99115	1.44	20
810	49	Audley et al	2022	Western United States	MCH-based semiochemical repellents for protecting Engelmann spruce trees from Dendroctonus rufipennis (Coleoptera: Curculionidae).	Wyoming	Central western North America	Dendroctonus rufipennis	2019	frontalin	MCH (3-methyl-2-cyclohexen-1-one)	Homo	Tree colonization	Tree attack	24.5294	20.04	13	80.3824	18.45	13
811	49	Audley et al	2022	Western United States	MCH-based semiochemical repellents for protecting Engelmann spruce trees from Dendroctonus rufipennis (Coleoptera: Curculionidae).	Wyoming	Central western North America	Dendroctonus rufipennis	2019	frontalin	3.5 AKB[MCH+AKB (Linalool + β-caryophyllene + ( Z)-3-hexanol)]	Homo+NHV	Tree colonization	Tree attack	17.1176	18.77	13	80.3824	18.45	13
812	49	Audley et al	2022	Western United States	MCH-based semiochemical repellents for protecting Engelmann spruce trees from Dendroctonus rufipennis (Coleoptera: Curculionidae).	Wyoming	Central western North America	Dendroctonus rufipennis	2019	frontalin	3.5PLUS [MCH (3.5 g a.i.) + Acetophenone + GLV (( E)-2-hexen-1-ol + ( Z)-2-hexen-1-ol)]	Homo+NHV	Tree colonization	Tree attack	14.4706	17.82	13	80.3824	18.45	13
813	49	Audley et al	2022	Western United States	MCH-based semiochemical repellents for protecting Engelmann spruce trees from Dendroctonus rufipennis (Coleoptera: Curculionidae).	Wyoming	Central western North America	Dendroctonus rufipennis	2019	frontalin	MCH (3-methyl-2-cyclohexen-1-one)	Homo	Tree colonization	Tree attack	21	19.41	13	80.3824	18.45	13
814	49	Audley et al	2022	Western United States	MCH-based semiochemical repellents for protecting Engelmann spruce trees from Dendroctonus rufipennis (Coleoptera: Curculionidae).	Wyoming	Central western North America	Dendroctonus rufipennis	2019	frontalin	7 AKB[MCH+AKB (Linalool + β-caryophyllene + ( Z)-3-hexanol)]	Homo+NHV	Tree colonization	Tree attack	12.4412	28	13	80.3824	18.45	13
815	49	Audley et al	2022	Western United States	MCH-based semiochemical repellents for protecting Engelmann spruce trees from Dendroctonus rufipennis (Coleoptera: Curculionidae).	Wyoming	Central western North America	Dendroctonus rufipennis	2019	frontalin	7PLUS [MCH (3.5 g a.i.) + Acetophenone + GLV (( E)-2-hexen-1-ol + ( Z)-2-hexen-1-ol)]	Homo+NHV	Tree colonization	Tree attack	15.8824	23.54	13	80.3824	18.45	13
816	49	Audley et al	2022	Western United States	MCH-based semiochemical repellents for protecting Engelmann spruce trees from Dendroctonus rufipennis (Coleoptera: Curculionidae).	Wyoming	Central western North America	Dendroctonus rufipennis	2019	frontalin	MCH (3-methyl-2-cyclohexen-1-one)	Homo	Tree killed	Tree killed	3.36502	6.99	13	42.6616	19.12	13
817	49	Audley et al	2022	Western United States	MCH-based semiochemical repellents for protecting Engelmann spruce trees from Dendroctonus rufipennis (Coleoptera: Curculionidae).	Wyoming	Central western North America	Dendroctonus rufipennis	2019	frontalin	3.5 AKB[MCH+AKB (Linalool + β-caryophyllene + ( Z)-3-hexanol)]	Homo+NHV	Tree killed	Tree killed	1.08365	4.11	13	42.6616	19.12	13
818	49	Audley et al	2022	Western United States	MCH-based semiochemical repellents for protecting Engelmann spruce trees from Dendroctonus rufipennis (Coleoptera: Curculionidae).	Wyoming	Central western North America	Dendroctonus rufipennis	2019	frontalin	3.5PLUS [MCH (3.5 g a.i.) + Acetophenone + GLV (( E)-2-hexen-1-ol + ( Z)-2-hexen-1-ol)]	Homo+NHV	Tree killed	Tree killed	3.02281	6.79	13	42.6616	19.12	13
819	49	Audley et al	2022	Western United States	MCH-based semiochemical repellents for protecting Engelmann spruce trees from Dendroctonus rufipennis (Coleoptera: Curculionidae).	Wyoming	Central western North America	Dendroctonus rufipennis	2019	frontalin	MCH (3-methyl-2-cyclohexen-1-one)	Homo	Tree killed	Tree killed	1.48289	5.76	13	42.6616	19.12	13
820	49	Audley et al	2022	Western United States	MCH-based semiochemical repellents for protecting Engelmann spruce trees from Dendroctonus rufipennis (Coleoptera: Curculionidae).	Wyoming	Central western North America	Dendroctonus rufipennis	2019	frontalin	7 AKB[MCH+AKB (Linalool + β-caryophyllene + ( Z)-3-hexanol)]	Homo+NHV	Tree killed	Tree killed	1.88213	5.76	13	42.6616	19.12	13
821	49	Audley et al	2022	Western United States	MCH-based semiochemical repellents for protecting Engelmann spruce trees from Dendroctonus rufipennis (Coleoptera: Curculionidae).	Wyoming	Central western North America	Dendroctonus rufipennis	2019	frontalin	7PLUS [MCH (3.5 g a.i.) + Acetophenone + GLV (( E)-2-hexen-1-ol + ( Z)-2-hexen-1-ol)]	Homo+NHV	Tree killed	Tree killed	4.61977	9.87	13	42.6616	19.12	13
822	50	Jirosova et al	2022	Czech Republic,	Anti-attractant activity of (+)-trans-4-thujanol for Eurasian spruce bark beetle Ips typographus: Novel potency for females.	Czech Republic	Eastern Europe	Ips typographus	2017	lure at low dose [2-methyl-3-buten-2-ol + (S)-cis-verbenol]	trans-4-thujanol	Host Repellent	Female attraction to lure	Female attraction to lure	29.8	32.18	14	22.8	27.69	14
823	50	Jirosova et al	2022	Czech Republic,	Anti-attractant activity of (+)-trans-4-thujanol for Eurasian spruce bark beetle Ips typographus: Novel potency for females.	Czech Republic	Eastern Europe	Ips typographus	2017	lure at low dose [2-methyl-3-buten-2-ol + (S)-cis-verbenol]	trans-4-thujanol	Host Repellent	Female attraction to lure	Female attraction to lure	8	12.35	14	22.8	27.69	14
824	50	Jirosova et al	2022	Czech Republic,	Anti-attractant activity of (+)-trans-4-thujanol for Eurasian spruce bark beetle Ips typographus: Novel potency for females.	Czech Republic	Eastern Europe	Ips typographus	2017	lure at low dose [2-methyl-3-buten-2-ol + (S)-cis-verbenol]	trans-4-thujanol	Host Repellent	Female attraction to lure	Female attraction to lure	5.1	5.99	14	22.8	27.69	14
825	50	Jirosova et al	2022	Czech Republic,	Anti-attractant activity of (+)-trans-4-thujanol for Eurasian spruce bark beetle Ips typographus: Novel potency for females.	Czech Republic	Eastern Europe	Ips typographus	2017	lure at low dose [2-methyl-3-buten-2-ol + (S)-cis-verbenol]	1,8-cineole	Host Repellent	Female attraction to lure	Female attraction to lure	3.3	3.74	14	22.8	27.69	14
826	50	Jirosova et al	2022	Czech Republic,	Anti-attractant activity of (+)-trans-4-thujanol for Eurasian spruce bark beetle Ips typographus: Novel potency for females.	Czech Republic	Eastern Europe	Ips typographus	2017	lure at low dose [2-methyl-3-buten-2-ol + (S)-cis-verbenol]	trans-4-thujanol	Host Repellent	Male attraction to lure	Male attraction to lure	13.4	14.22	14	12.8	19.46	14
827	50	Jirosova et al	2022	Czech Republic,	Anti-attractant activity of (+)-trans-4-thujanol for Eurasian spruce bark beetle Ips typographus: Novel potency for females.	Czech Republic	Eastern Europe	Ips typographus	2017	lure at low dose [2-methyl-3-buten-2-ol + (S)-cis-verbenol]	trans-4-thujanol	Host Repellent	Male attraction to lure	Male attraction to lure	4.9	6.73	14	12.8	19.46	14
828	50	Jirosova et al	2022	Czech Republic,	Anti-attractant activity of (+)-trans-4-thujanol for Eurasian spruce bark beetle Ips typographus: Novel potency for females.	Slovak Republic	Eastern Europe	Ips typographus	2017	lure at low dose [2-methyl-3-buten-2-ol + (S)-cis-verbenol]	trans-4-thujanol	Host Repellent	Male attraction to lure	Male attraction to lure	3.2	4.12	14	12.8	19.46	14
829	50	Jirosova et al	2022	Czech Republic,	Anti-attractant activity of (+)-trans-4-thujanol for Eurasian spruce bark beetle Ips typographus: Novel potency for females.	Slovak Republic	Eastern Europe	Ips typographus	2017	lure at low dose [2-methyl-3-buten-2-ol + (S)-cis-verbenol]	1,8-cineole	Host Repellent	Male attraction to lure	Male attraction to lure	1.6	1.87	14	12.8	19.46	14
830	50	Jirosova et al	2022	Czech Republic,	Anti-attractant activity of (+)-trans-4-thujanol for Eurasian spruce bark beetle Ips typographus: Novel potency for females.	Slovak Republic	Eastern Europe	Ips typographus	2017	lure at low dose [2-methyl-3-buten-2-ol + (S)-cis-verbenol]	trans-4-thujanol	Host Repellent	Female attraction to lure	Female attraction to lure	69.8	115.6	5	28.4	26.39	5
831	50	Jirosova et al	2022	Czech Republic,	Anti-attractant activity of (+)-trans-4-thujanol for Eurasian spruce bark beetle Ips typographus: Novel potency for females.	Slovak Republic	Eastern Europe	Ips typographus	2017	lure at low dose [2-methyl-3-buten-2-ol + (S)-cis-verbenol]	trans-4-thujanol	Host Repellent	Female attraction to lure	Female attraction to lure	14.6	22.14	5	28.4	26.39	5
832	50	Jirosova et al	2022	Czech Republic,	Anti-attractant activity of (+)-trans-4-thujanol for Eurasian spruce bark beetle Ips typographus: Novel potency for females.	Slovak Republic	Eastern Europe	Ips typographus	2017	lure at low dose [2-methyl-3-buten-2-ol + (S)-cis-verbenol]	trans-4-thujanol	Host Repellent	Female attraction to lure	Female attraction to lure	6.2	10.51	5	28.4	26.39	5
833	50	Jirosova et al	2022	Czech Republic,	Anti-attractant activity of (+)-trans-4-thujanol for Eurasian spruce bark beetle Ips typographus: Novel potency for females.	Slovak Republic	Eastern Europe	Ips typographus	2017	lure at low dose [2-methyl-3-buten-2-ol + (S)-cis-verbenol]	1,8-cineole	Host Repellent	Female attraction to lure	Female attraction to lure	8.8	11.4	5	28.4	26.39	5
834	50	Jirosova et al	2022	Czech Republic,	Anti-attractant activity of (+)-trans-4-thujanol for Eurasian spruce bark beetle Ips typographus: Novel potency for females.	Slovak Republic	Eastern Europe	Ips typographus	2017	lure at low dose [2-methyl-3-buten-2-ol + (S)-cis-verbenol]	trans-4-thujanol	Host Repellent	Male attraction to lure	Male attraction to lure	16.2	24.82	5	10.4	8.27	5
835	50	Jirosova et al	2022	Czech Republic,	Anti-attractant activity of (+)-trans-4-thujanol for Eurasian spruce bark beetle Ips typographus: Novel potency for females.	Slovak Republic	Eastern Europe	Ips typographus	2017	lure at low dose [2-methyl-3-buten-2-ol + (S)-cis-verbenol]	trans-4-thujanol	Host Repellent	Male attraction to lure	Male attraction to lure	4.6	8.05	5	10.4	8.27	5
836	50	Jirosova et al	2022	Czech Republic,	Anti-attractant activity of (+)-trans-4-thujanol for Eurasian spruce bark beetle Ips typographus: Novel potency for females.	Czech Republic	Eastern Europe	Ips typographus	2017	lure at low dose [2-methyl-3-buten-2-ol + (S)-cis-verbenol]	trans-4-thujanol	Host Repellent	Male attraction to lure	Male attraction to lure	2	4.02	5	10.4	8.27	5
837	50	Jirosova et al	2022	Czech Republic,	Anti-attractant activity of (+)-trans-4-thujanol for Eurasian spruce bark beetle Ips typographus: Novel potency for females.	Czech Republic	Eastern Europe	Ips typographus	2017	lure at low dose [2-methyl-3-buten-2-ol + (S)-cis-verbenol]	1,8-cineole	Host Repellent	Male attraction to lure	Male attraction to lure	2.2	4.47	5	10.4	8.27	5
838	50	Jirosova et al	2022	Czech Republic,	Anti-attractant activity of (+)-trans-4-thujanol for Eurasian spruce bark beetle Ips typographus: Novel potency for females.	Czech Republic	Eastern Europe	Ips typographus	2017	lure at high dose [2-methyl-3-buten-2-ol + (S)-cis-verbenol]	trans-4-thujanol	Host Repellent	Female attraction to lure	Female attraction to lure	149.1	143.31	14	158.3	145.55	14
839	50	Jirosova et al	2022	Czech Republic,	Anti-attractant activity of (+)-trans-4-thujanol for Eurasian spruce bark beetle Ips typographus: Novel potency for females.	Czech Republic	Eastern Europe	Ips typographus	2017	lure at high dose [2-methyl-3-buten-2-ol + (S)-cis-verbenol]	trans-4-thujanol	Host Repellent	Female attraction to lure	Female attraction to lure	94	138.44	14	158.3	145.55	14
840	50	Jirosova et al	2022	Czech Republic,	Anti-attractant activity of (+)-trans-4-thujanol for Eurasian spruce bark beetle Ips typographus: Novel potency for females.	Czech Republic	Eastern Europe	Ips typographus	2017	lure at high dose [2-methyl-3-buten-2-ol + (S)-cis-verbenol]	trans-4-thujanol	Host Repellent	Female attraction to lure	Female attraction to lure	33.2	59.49	14	158.3	145.55	14
841	50	Jirosova et al	2022	Czech Republic,	Anti-attractant activity of (+)-trans-4-thujanol for Eurasian spruce bark beetle Ips typographus: Novel potency for females.	Czech Republic	Eastern Europe	Ips typographus	2017	lure at high dose [2-methyl-3-buten-2-ol + (S)-cis-verbenol]	1,8-cineole	Host Repellent	Female attraction to lure	Female attraction to lure	60.4	73.34	14	158.3	145.55	14
842	50	Jirosova et al	2022	Czech Republic,	Anti-attractant activity of (+)-trans-4-thujanol for Eurasian spruce bark beetle Ips typographus: Novel potency for females.	Czech Republic	Eastern Europe	Ips typographus	2017	lure at high dose [2-methyl-3-buten-2-ol + (S)-cis-verbenol]	trans-4-thujanol	Host Repellent	Male attraction to lure	Male attraction to lure	61.8	63.98	14	72.9	88.68	14
843	50	Jirosova et al	2022	Czech Republic,	Anti-attractant activity of (+)-trans-4-thujanol for Eurasian spruce bark beetle Ips typographus: Novel potency for females.	Czech Republic	Eastern Europe	Ips typographus	2017	lure at high dose [2-methyl-3-buten-2-ol + (S)-cis-verbenol]	trans-4-thujanol	Host Repellent	Male attraction to lure	Male attraction to lure	29.2	39.29	14	72.9	88.68	14
844	50	Jirosova et al	2022	Czech Republic,	Anti-attractant activity of (+)-trans-4-thujanol for Eurasian spruce bark beetle Ips typographus: Novel potency for females.	Slovak Republic	Eastern Europe	Ips typographus	2017	lure at high dose [2-methyl-3-buten-2-ol + (S)-cis-verbenol]	trans-4-thujanol	Host Repellent	Male attraction to lure	Male attraction to lure	12.2	23.57	14	72.9	88.68	14
845	50	Jirosova et al	2022	Czech Republic,	Anti-attractant activity of (+)-trans-4-thujanol for Eurasian spruce bark beetle Ips typographus: Novel potency for females.	Slovak Republic	Eastern Europe	Ips typographus	2017	lure at high dose [2-methyl-3-buten-2-ol + (S)-cis-verbenol]	1,8-cineole	Host Repellent	Male attraction to lure	Male attraction to lure	19.9	22.45	14	72.9	88.68	14
846	50	Jirosova et al	2022	Czech Republic,	Anti-attractant activity of (+)-trans-4-thujanol for Eurasian spruce bark beetle Ips typographus: Novel potency for females.	Slovak Republic	Eastern Europe	Ips typographus	2017	lure at high dose [2-methyl-3-buten-2-ol + (S)-cis-verbenol]	trans-4-thujanol	Host Repellent	Female attraction to lure	Female attraction to lure	851.8	796.93	5	324.2	302.09	5
847	50	Jirosova et al	2022	Czech Republic,	Anti-attractant activity of (+)-trans-4-thujanol for Eurasian spruce bark beetle Ips typographus: Novel potency for females.	Slovak Republic	Eastern Europe	Ips typographus	2017	lure at high dose [2-methyl-3-buten-2-ol + (S)-cis-verbenol]	trans-4-thujanol	Host Repellent	Female attraction to lure	Female attraction to lure	41.2	52.1	5	324.2	302.09	5
848	50	Jirosova et al	2022	Czech Republic,	Anti-attractant activity of (+)-trans-4-thujanol for Eurasian spruce bark beetle Ips typographus: Novel potency for females.	Slovak Republic	Eastern Europe	Ips typographus	2017	lure at high dose [2-methyl-3-buten-2-ol + (S)-cis-verbenol]	trans-4-thujanol	Host Repellent	Female attraction to lure	Female attraction to lure	18.8	30.63	5	324.2	302.09	5
849	50	Jirosova et al	2022	Czech Republic,	Anti-attractant activity of (+)-trans-4-thujanol for Eurasian spruce bark beetle Ips typographus: Novel potency for females.	Slovak Republic	Eastern Europe	Ips typographus	2017	lure at high dose [2-methyl-3-buten-2-ol + (S)-cis-verbenol]	1,8-cineole	Host Repellent	Female attraction to lure	Female attraction to lure	107.2	69.54	5	324.2	302.09	5
850	50	Jirosova et al	2022	Czech Republic,	Anti-attractant activity of (+)-trans-4-thujanol for Eurasian spruce bark beetle Ips typographus: Novel potency for females.	Slovak Republic	Eastern Europe	Ips typographus	2017	lure at high dose [2-methyl-3-buten-2-ol + (S)-cis-verbenol]	trans-4-thujanol	Host Repellent	Male attraction to lure	Male attraction to lure	87.8	104.42	5	38.4	29.74	5
851	50	Jirosova et al	2022	Czech Republic,	Anti-attractant activity of (+)-trans-4-thujanol for Eurasian spruce bark beetle Ips typographus: Novel potency for females.	Slovak Republic	Eastern Europe	Ips typographus	2017	lure at high dose [2-methyl-3-buten-2-ol + (S)-cis-verbenol]	trans-4-thujanol	Host Repellent	Male attraction to lure	Male attraction to lure	9.6	13.19	5	38.4	29.74	5
852	50	Jirosova et al	2022	Czech Republic,	Anti-attractant activity of (+)-trans-4-thujanol for Eurasian spruce bark beetle Ips typographus: Novel potency for females.	Slovak Republic	Eastern Europe	Ips typographus	2017	lure at high dose [2-methyl-3-buten-2-ol + (S)-cis-verbenol]	trans-4-thujanol	Host Repellent	Male attraction to lure	Male attraction to lure	7	12.3	5	38.4	29.74	5
853	50	Jirosova et al	2022	Czech Republic,	Anti-attractant activity of (+)-trans-4-thujanol for Eurasian spruce bark beetle Ips typographus: Novel potency for females.	Slovak Republic	Eastern Europe	Ips typographus	2017	lure at high dose [2-methyl-3-buten-2-ol + (S)-cis-verbenol]	1,8-cineole	Host Repellent	Male attraction to lure	Male attraction to lure	16.4	12.52	5	38.4	29.74	5
854	51	Lindmark et al	2022	Sweden	Protecting forest edges using trap logs – Limited effects of associated push-pull strategies targeting Ips typographus.	Sweden	Scandinavia	Ips typographus	year 1	cis-Verbenol,Ipsdienol	conophthorin (tC) and 1-hexanol	NHV	Tree colonization	Tree attack	308.177	122.147	3	399.659	78.7053	3
855	51	Lindmark et al	2022	Sweden	Protecting forest edges using trap logs – Limited effects of associated push-pull strategies targeting Ips typographus.	Sweden	Scandinavia	Ips typographus	year 2	cis-Verbenol,Ipsdienol	conophthorin (tC), 1-octanol, 1-hexanol and verbenone	Vb+NHV	Tree colonization	Tree attack	171.21	51.1073	4	169.165	82.7939	4
856	51	Lindmark et al	2022	Sweden	Protecting forest edges using trap logs – Limited effects of associated push-pull strategies targeting Ips typographus.	Sweden	Scandinavia	Ips typographus	year 1	cis-Verbenol,Ipsdienol	conophthorin (tC) and 1-hexanol	NHV	Tree colonization	Tree attack	363	138.2	3	427	106.7	3
857	51	Lindmark et al	2022	Sweden	Protecting forest edges using trap logs – Limited effects of associated push-pull strategies targeting Ips typographus.	Sweden	Scandinavia	Ips typographus	year 2	cis-Verbenol,Ipsdienol	conophthorin (tC), 1-octanol, 1-hexanol and verbenone	Vb+NHV	Tree colonization	Tree attack	188	52.9	4	168	69.9	4
858	52	Sullivan and Brownie	2022	USA	The role of wind and semiochemicals in mediating switching behavior in the southern pine beetle (coleoptera: curculionidae: scolytinae).	Mississippi	South-eastern North America	Dendroctonus frontalis	2008	frontalin+endo-brevicomin+turpentine	Verbenone	Vb	Attraction to lure	Attraction to lure	11.9	45.77	61	17	64.51	61
859	52	Sullivan and Brownie	2022	USA	The role of wind and semiochemicals in mediating switching behavior in the southern pine beetle (coleoptera: curculionidae: scolytinae).	Mississippi	South-eastern North America	Dendroctonus frontalis	2008	frontalin+endo-brevicomin+turpentine	Verbenone	Vb	Attraction to lure	Attraction to lure	6.99	18.98	61	17	64.51	61
860	52	Sullivan and Brownie	2022	USA	The role of wind and semiochemicals in mediating switching behavior in the southern pine beetle (coleoptera: curculionidae: scolytinae).	Mississippi	South-eastern North America	Dendroctonus frontalis	2008	frontalin+endo-brevicomin+turpentine	Verbenone	Vb	Female attraction to lure	Female attraction to lure	5.9	22.42	61	7.86	27.96	61
861	52	Sullivan and Brownie	2022	USA	The role of wind and semiochemicals in mediating switching behavior in the southern pine beetle (coleoptera: curculionidae: scolytinae).	Mississippi	South-eastern North America	Dendroctonus frontalis	2008	frontalin+endo-brevicomin+turpentine	Verbenone	Vb	Female attraction to lure	Female attraction to lure	3.64	9.92	61	7.86	27.96	61
862	52	Sullivan and Brownie	2022	USA	The role of wind and semiochemicals in mediating switching behavior in the southern pine beetle (coleoptera: curculionidae: scolytinae).	Mississippi	South-eastern North America	Dendroctonus frontalis	2008	frontalin+endo-brevicomin+turpentine	Verbenone	Vb	Male attraction to lure	Male attraction to lure	6.01	23.43	61	9.36	37.02	61
863	52	Sullivan and Brownie	2022	USA	The role of wind and semiochemicals in mediating switching behavior in the southern pine beetle (coleoptera: curculionidae: scolytinae).	Mississippi	South-eastern North America	Dendroctonus frontalis	2008	frontalin+endo-brevicomin+turpentine	Verbenone	Vb	Male attraction to lure	Male attraction to lure	3.35	9.22	61	9.36	37.02	61
